# Supplementary material for: Bright Luminescence by Combining Chiral [2.2]Paracyclophane with a Boron–Nitrogen‐Doped Polyaromatic Hydrocarbon Building Block
Source: PubMed Central journal article supplement — Chemistry. 2022 Jan 20;28(11):e202104161. doi: 10.1002/chem.202104161 (PMC9306876; doi:10.1002/chem.202104161), 2022-01-20
Supplement: CHEM-28-0-s001.pdf [file CHEM-28-0-s001.pdf]

# Chemistry–A European Journal

Supporting Information

## **Bright Luminescence by Combining Chiral [2.2]Paracyclophane with a Boron–Nitrogen-Doped Polyaromatic Hydrocarbon Building Block**

Mario R. Rapp, Wolfgang Leis, Francesco Zinna, Lorenzo Di Bari, Tamara Arnold,  
Bernd Speiser, Michael Seitz, and Holger F. Bettinger\*

## Table of Contents

|                                                                     |    |
|---------------------------------------------------------------------|----|
| 1. Materials and Synthesis                                          | 2  |
| 2. Spectra: NMR & mass                                              | 11 |
| 3. Optical Spectra: UV/Vis, Emission, Excitation, Emission lifetime | 36 |
| 4. Electrochemical studies                                          | 41 |
| 5. Computational studies                                            | 44 |
| 6. Cartesian Coordinates                                            | 78 |

## 1. Materials and Synthesis

**General.** Unless otherwise indicated, all reactions were carried out under dry and inert conditions by heating all glassware with a heat gun under vacuum and purging with argon. All chemicals and solvents were purchased from commercial suppliers in anhydrous form or were dried by known methods or, in the cases of CH<sub>2</sub>Cl<sub>2</sub>, THF and toluene taken from a MBRAUN SPS 800 solvent purification system. Solvents were degassed by the freeze-pump-thaw method. TLC was done using precoated polyester sheets (40 × 80 mm) from Machery-Nagel (POLYGAM® SIL G/UV254) with 0.2 mm silica gel 60 with fluorescent indicator. A UV light source from Köhler (254 nm and 366 nm) was used for visualization. NMR spectroscopy was done on a Bruker Avance III 400 spectrometer (equipped with a dual (<sup>1</sup>H/<sup>13</sup>C) probe head. Chemical shifts  $\delta$  are given in ppm, coupling constants  $J$  in hertz (Hz) and standard abbreviations are designated to the multiplicities of the signals. The spectra were calibrated with the solvent residual signals. High resolution mass spectrometry was done with electron spray ionization time of flight mass spectrometry (ESI-TOF-MS) on a maXis 4G Bruker system. UV/Vis absorption spectra were recorded on a PerkinElmer Lambda 1050 spectrometer with a PerkinElmer 3D WB Det Module in 1.0 cm quartz cuvettes, and samples were analyzed in CH<sub>2</sub>Cl<sub>2</sub> at room temperature. Agglomeration experiments of higher concentrated samples up to  $c = 1.00 \cdot 10^{-3}$  M were measured in a measuring cell with 100-1000  $\mu$ m optical path. Steady-state excitation and emission spectra were recorded on a Horiba Fluorolog-3 DF spectrofluorimeter equipped with a 450 W Xe lamp, and samples were analysed in CH<sub>2</sub>Cl<sub>2</sub> at room temperature. Emission was monitored at a 90° angle using a Hamamatsu R2658P PMT (UV/Vis/NIR, 200 nm <  $\lambda_{em}$  < 1000 nm) detector. Spectral selection was achieved by the double grating monochromator 320DFX for excitation (1200 grooves/nm, blazed at 330 nm) and the single grating emission monochromator iHR550 for the visible path (1200 grooves/nm, blazed at 500 nm). To avoid higher order excitation light, long pass filter plates were used when needed. For the lifetime measurements, a pulsed LED (Horiba DeltaDiode-310,  $\lambda_{em} = 308 \pm 10$  nm, pulse width  $\sim 1$  ns FWHM,  $P_{avg} = 5$   $\mu$ W) was used. Lifetime data analysis (least square fitting, statistical parameters, etc.) was performed using the software package DAS from Horiba. Lifetimes were determined from the decay curves by an iterative reconvolution fitting method using appropriate multi-exponential functions and taking into account the instruments response function. The instrument used for determination of fluorescence quantum yields of **6**, **7m** and **7p** was a PTI Quantamaster QM4 equipped with a 75 W continuous Xe short arc lamp as excitation source. Spectral selection was achieved by single grating monochromators (excitation: 1200 grooves/mm, 300 nm blaze; UV-Vis emission: 1200 grooves/mm, 500 nm blaze). Samples of **6**, **7m** and **7p** in CH<sub>2</sub>Cl<sub>2</sub> were measured with an excitation wavelength  $\lambda_{ex} = 345$  nm (quinine sulfate in 0.1 M aqueous H<sub>2</sub>SO<sub>4</sub> as reference with a fluorescence quantum yield of  $\Phi = 0.546^{[1]}$ ). All measurements were done in spectroscopy grade solvents. Circular dichroism (CD) spectra were recorded on a JASCO J-710 spectropolarimeter with CH<sub>2</sub>Cl<sub>2</sub> as a solvent at room temperature. Circular polarized luminescence (CPL) spectra were recorded on a home-build spectrofluorimeter, which is a converted decommissioned circular dichroism spectropolarimeter (Jasco J500-C spectropolarimeter, 1981).<sup>[2]</sup> A 365 nm LED was used as the excitation source, employing a 90° geometry and the excitation light was linearly polarized parallel to the detection direction. Luminescence dissymmetry factor ( $g_{lum}$ ) was calculated as  $2(I_L - I_R)/(I_L + I_R)$ , where  $I_L$  and  $I_R$  are left and right circularly polarized components of the emission. Specific rotations ( $[\alpha]_D^{20}$ ) were measured with a Polarimeter 341 from Perkin-Elmer.

**Materials.** The synthesis and full characterization of compounds **1**, **2**, 4,7,12,15-tetrabromo[2.2]paracyclophane, and rac-**5** have been reported previously.<sup>[3-5]</sup> 4,7,12,15-tetra(trimethylsilylethynyl)[2.2]paracyclophane was prepared following a modified literature

procedure,<sup>[5]</sup> using CuI/Pd<sub>2</sub>(dba)<sub>3</sub> with (*t*-Bu)<sub>3</sub>PH·BF<sub>4</sub> as catalysts instead of CuI/Pd(PPh<sub>3</sub>)<sub>4</sub>, resulting in the formation of fewer side-products and higher yield. Enantiopure (R)-**5** and (S)-**5** were prepared according to a procedure by Morisaki et al.<sup>[6]</sup>

## Synthetic Procedures.

### 4,7,12,15-Tetra(trimethylsilylethynyl)[2.2]paracyclophane

4,7,12,15-Tetrabromo[2.2]paracyclophane (2.50 g, 4.77 mmol, 1.00 eq), CuI (182 mg, 0.95 mmol 0.20 eq), Pd<sub>2</sub>(dba)<sub>3</sub> (440 mg, 0.48 mmol 0.10 eq.) and (*t*-Bu)<sub>3</sub>PH·BF<sub>4</sub> (554 mg, 1.91 mmol, 0.40 eq) are suspended in dry, degassed THF/Et<sub>3</sub>N (100 ml, 1:1 v/v). Trimethylsilylacetylene (8.15 ml, 57.3 mmol, 12.00 eq) is added and the reaction mixture is heated to 50 °C. After stirring for 18 h, the mixture is allowed to cool to r.t. and all volatiles are removed under reduced pressure. The residue is suspended in CH<sub>2</sub>Cl<sub>2</sub> and filtered through a Celite plug. The filtrate is evaporated to dryness and the crude product is purified by silica column chromatography (CHCl<sub>3</sub>/pentane 1:20) yielding the product as a yellow solid (2.42 g, 4.08 mmol, 86 %).

<sup>1</sup>H NMR (CDCl<sub>3</sub>, 400 MHz): δ 6.98 (s, 4H), 3.43-3.33 (m, 4H), 2.96-2.86 (m, 4H), 0.31 (s, 36H) ppm.

<sup>13</sup>C{<sup>1</sup>H} NMR (CDCl<sub>3</sub>, 101 MHz): δ 142.3, 134.6, 125.3, 104.9, 99.6, 32.3, 0.2 ppm.

The signals are according to the literature.<sup>[5]</sup>

### 1-(2-Hydroxyphenyl)-NBN-benzo[*f,g*]tetracene, **3o**

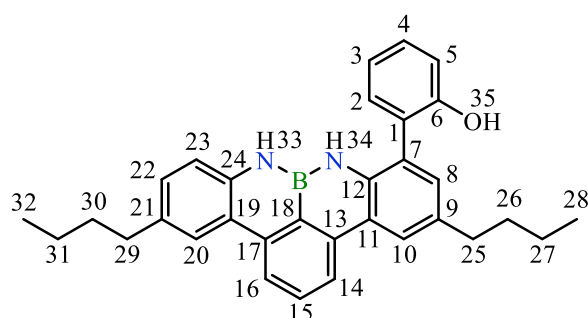

1-Bromo-NBN-benzo[*f,g*]tetracene (**2**) (500 mg, 1.09 mmol, 1.00 eq), 2-hydroxyphenylboronic acid pinacol ester (335 mg, 1.52 mmol, 1.40 eq) and Pd(PPh<sub>3</sub>)<sub>4</sub> (126 mg, 0.11 mmol, 0.10 eq) are suspended in deoxygenated THF (5 mL) and aqueous, deoxygenated 2M K<sub>2</sub>CO<sub>3</sub> (2.18 mL, 4.36 mmol, 4.00 eq). The mixture is heated to 75 °C for 40-48 h and is allowed to cool to

r.t.. The suspension is poured into water (25 mL) and the aqueous phase is extracted with CH<sub>2</sub>Cl<sub>2</sub> (3 x 20 mL). The combined organic phases are washed with brine (20 mL), dried over MgSO<sub>4</sub> and filtered. The solvent is evaporated under reduced pressure and the crude product is purified by silica gel column chromatography (EA/hexane 2:7, R<sub>f</sub> = 0.61 in EA/hexane 1:2) yielding **3o** as a colorless, foam-like solid (509 mg, 1.08 mmol, 99 %); mp 67-68 °C. Small impurities remain in the isolated product that are related to the starting material hydroxyphenylboronic acid pinacol ester or compounds with a similar substitution pattern on the benzene ring and are best removed in the following synthesis step by triflation of the hydroxyl group of **3o** and subsequent column chromatography.

<sup>1</sup>H NMR (400 MHz, CD<sub>2</sub>Cl<sub>2</sub>): δ 8.24 (d, <sup>3</sup>J = 8.0 Hz, 1H, H-14), 8.20 (d, <sup>3</sup>J = 8.0 Hz, 1H, H-16), 8.17 (d, <sup>4</sup>J = 1.9 Hz, 1H, H-10), 8.04 (d, <sup>4</sup>J = 1.9 Hz, 1H, H-20), 7.83 (vt, <sup>3</sup>J = 8.0 Hz, 1H, H-15), 7.41 (ddd, <sup>3</sup>J = 8.2 Hz, <sup>3</sup>J = 7.4 Hz, <sup>4</sup>J = 1.7 Hz, 1H, H-4), 7.33 (dd, <sup>3</sup>J = 7.8 Hz, <sup>4</sup>J = 1.7 Hz, 1H, H-2), 7.18-7.06 (m, 4H, H-3, H-5, H-8, H-22), 6.91 (d, <sup>3</sup>J = 8.1 Hz, 1H, H-23), 6.31 (s, 1H, NH-34), 6.28 (s, 1H, NH-33), 5.13 (s, 1H, OH-35), 2.77-2.65 (m, 4H, H-25, H-29), 1.75-1.60 (m, 4H, H-26, H-30), 1.49-1.35 (m, 4H, H-27, H-31), 1.01-0.92 (m, 6H, H-28, H-32) ppm.

$^{13}\text{C}\{^1\text{H}\}$  NMR (101 MHz,  $\text{CD}_2\text{Cl}_2$ ):  $\delta$  154.1 (C-6), 139.6 (C-17), 139.5 (C-13), 139.0 (C-24), 137.3 (C-12), 134.9 (C-9), 134.8 (C-21), 131.9 (C-2), 131.5 (C-15), 131.2 (C-8), 130.6 (C-4), 129.4 (C-22), 127.6 (C-18, determined via 2D spectra), 125.2 (C-10), 125.0 (C-1), 124.4 (C-20), 124.3 (C-7), 123.2 (C-11), 122.2 (C-19), 121.7 (C-3), 119.6 (C-16), 119.5 (C-14), 118.6 (C-23), 116.5 (C-5), 35.8 (C-29), 35.8 (C-25), 34.8 (C-30), 34.7 (C-26), 23.0 (C-31), 23.0 (C-27), 14.4 (C-28, C-32) ppm.

$^{11}\text{B}\{^1\text{H}\}$  NMR (128 MHz,  $\text{CD}_2\text{Cl}_2$ ):  $\delta$  26.9 ppm.

HRMS (ESI):  $m/z$   $[\text{M}-\text{H}]^-$  calculated for  $\text{C}_{32}\text{H}_{32}\text{BN}_2\text{O}$ : 471.26187; found: 471.26209 ( $\Delta$ : 0.45 ppm).

### 1-(3-Hydroxyphenyl)-NBN-benzo[*f,g*]tetracene, **3m**

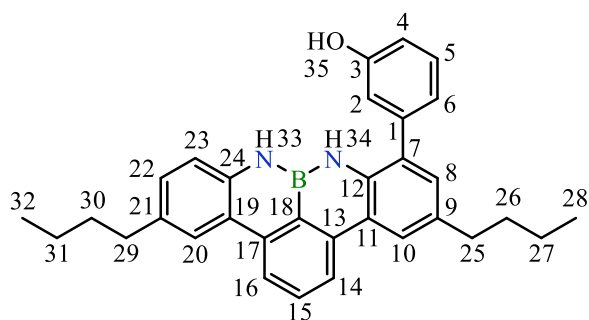

1-Bromo-NBN-benzo[*f,g*]tetracene (**2**) (565 mg, 1.23 mmol, 1.00 eq), 3-hydroxyphenylboronic acid pinacol ester (379 mg, 1.72 mmol, 1.40 eq) and  $\text{Pd}(\text{PPh}_3)_4$  (142 mg, 0.12 mmol, 0.10 eq) are suspended in deoxygenated THF (6 mL) and aqueous, deoxygenated 2M  $\text{K}_2\text{CO}_3$  (2.46 mL, 4.92 mmol, 4.00 eq). The mixture is heated to 75 °C for 40-48 h and is allowed to cool to r.t.. The suspension is poured into water

(25 mL) and the aqueous phase is extracted with  $\text{CH}_2\text{Cl}_2$  (3 x 20 mL). The combined organic phases are washed with brine (20 mL), dried over  $\text{MgSO}_4$  and filtered. The solvent is evaporated under reduced pressure and the crude product is purified by silica gel column chromatography (EA/hexane 2:7,  $R_f$  = 0.65 in EA/hexane 1:2) yielding **3m** as a colorless, highly viscous oil (575 mg, 1.22 mmol, 99 %). Small impurities remain in the isolated product that are related to the starting material hydroxyphenylboronic acid pinacol ester or compounds with a similar substitution pattern on the benzene ring and are best removed in the following synthesis step by triflation of the hydroxyl group of **3m** and subsequent column chromatography.

$^1\text{H}$  NMR (400 MHz,  $\text{CD}_2\text{Cl}_2$ ):  $\delta$  8.23 (d,  $^3J$  = 8.0 Hz, 1H, H-14), 8.18 (d,  $^3J$  = 8.0 Hz, 1H, H-16), 8.10 (d,  $^4J$  = 1.3 Hz, 1H, H-10), 8.04 (d,  $^4J$  = 1.1 Hz, 1H, H-20), 7.82 (vt,  $^3J$  = 8.0 Hz, 1H, H-15), 7.42 (vt,  $^3J$  = 7.8 Hz, 1H, H-5), 7.12 (m, 2H, H-8 + H-22), 7.08 (dvt,  $^3J$  = 7.8 Hz,  $^4J$  = 1.0 Hz, 1H, H-6), 6.99 (dd,  $^4J$  = 2.5 Hz,  $^4J$  = 1.0 Hz, 1H, H-2), 6.95 (ddd,  $^3J$  = 7.8 Hz,  $^4J$  = 2.5 Hz,  $^4J$  = 1.0 Hz, 1H, H-4), 6.90 (d,  $^3J$  = 8.1 Hz, 1H, H-23), 6.69 (s, 1H, NH-34), 6.26 (s, 1H, NH-33), 5.63 (s, 1H, OH-35), 2.78-2.65 (m, 4H, H-25 + H-29), 1.76-1.61 (m, 4H, H-26 + H-30), 1.50-1.36 (m, 4H, H-27 + H-31), 1.03-0.93 (m, 6H, H-28 + H-32) ppm.

$^{13}\text{C}\{^1\text{H}\}$  NMR (101 MHz,  $\text{CD}_2\text{Cl}_2$ ):  $\delta$  157.0 (C-3), 141.6 (C-1), 139.8 (C-13), 139.6 (C-17), 139.2 (C-24), 136.3 (C-12), 134.7 (C-21), 134.1 (C-9), 131.4 (C-15), 131.0 (C-5), 130.7 (C-7), 130.4 (C-8), 129.3 (C-22), 127.4 (C-18), 124.4 (C-20), 124.1 (C-10), 122.5 (C-11), 122.5 (C-6), 122.2 (C-19), 119.6 (C-14), 119.3 (C-16), 118.5 (C-23), 117.1 (C-2), 115.1 (C-4), 35.8 (C-29 + C-25), 34.8 (C-30), 34.7 (C-26), 23.0 (C-31), 23.0 (C-27), 14.4 (C-32), 14.4 (C-28) ppm.

$^{11}\text{B}\{^1\text{H}\}$  NMR (128 MHz,  $\text{CD}_2\text{Cl}_2$ ):  $\delta$  26.7 ppm.

HRMS (ESI):  $m/z$   $[\text{M}-\text{H}]^-$  calculated for  $\text{C}_{32}\text{H}_{32}\text{BN}_2\text{O}$ : 471.26187; found: 471.26254 ( $\Delta$ : 1.41 ppm).

### 1-(4-Hydroxyphenyl)-NBN-benzo[*f,g*]tetracene, **3p**

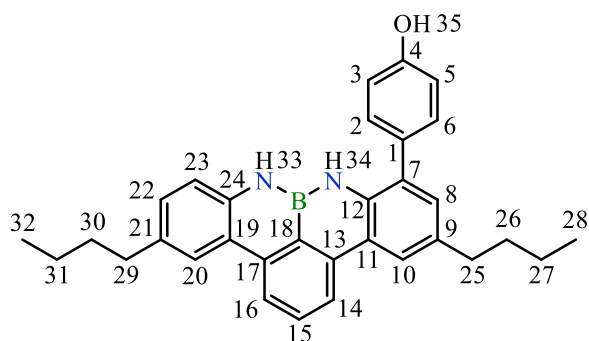

(25 mL) and the aqueous phase is extracted with CH<sub>2</sub>Cl<sub>2</sub> (3 x 20 mL). The combined organic phases are washed with brine (20 mL), dried over MgSO<sub>4</sub> and filtered. The solvent is evaporated under reduced pressure and the crude product is purified by silica gel column chromatography (EA/hexane 2:7, R<sub>f</sub> = 0.58 in EA/hexane 1:2) yielding **3p** as a colorless, foam-like solid (444 mg, 0.940 mmol, 86 %); mp 159-162 °C (decomposition). Small impurities remain in the isolated product that are related to the starting material hydroxyphenylboronic acid pinacol ester or compounds with a similar substitution pattern on the benzene ring and are best removed in the following synthesis step by triflation of the hydroxyl group of **3p** and subsequent column chromatography.

<sup>1</sup>H NMR (400 MHz, CD<sub>2</sub>Cl<sub>2</sub>): δ 8.23 (d, <sup>3</sup>J = 8.0 Hz, 1H, H-14), 8.18 (d, <sup>3</sup>J = 8.0 Hz, 1H, H-16), 8.08 (d, <sup>4</sup>J = 1.8 Hz, 1H, H-10), 8.04 (d, <sup>4</sup>J = 1.8 Hz, 1H, H-20), 7.82 (vt, <sup>3</sup>J = 8.0 Hz, 1H, H-15), 7.42-7.36 (m, 2H, H-2 + H-6), 7.13 (dd, <sup>3</sup>J = 8.1 Hz, <sup>4</sup>J = 1.8 Hz, 1H, H-22), 7.09 (d, <sup>4</sup>J = 1.8 Hz, 1H, H-6), 7.04-6.99 (m, 2H, H-3 + H-5), 6.92 (d, <sup>3</sup>J = 8.1 Hz, 1H, H-23), 6.62 (s, 1H, NH-34), 6.24 (s, 1H, NH-33), 5.18 (s, 1H, OH-35), 2.77-2.64 (m, 4H, H-25 + H-29), 1.75-1.60 (m, 4H, H-26 + H-30), 1.50-1.35 (m, 4H, H-27 + H-31), 1.02-0.92 (m, 6H, H-28 + H-32) ppm.

<sup>13</sup>C{<sup>1</sup>H} NMR (101 MHz, CD<sub>2</sub>Cl<sub>2</sub>): δ 155.9 (C-4), 139.9 (C-13), 139.6 (C-17), 139.2 (C-24), 136.4 (C-12), 134.7 (C-9), 134.1 (C-21), 132.1 (C-1), 131.6 (C-6), 131.4 (C-15), 130.7 (C-8), 130.7 (C-7), 129.3 (C-22), 127.4 (C-18, determined via 2D spectra), 124.4 (C-20), 123.7 (C-10), 122.4 (C-11), 122.2 (C-19), 119.5 (C-14), 119.2 (C-16), 118.5 (C-23), 116.5 (C-3 + C-5), 35.8 (C-29), 35.8 (C-25), 34.8 (C-30), 34.8 (C-26), 23.0 (C-31), 23.0 (C-27), 14.4 (C-32), 14.4 (C-28) ppm.

<sup>11</sup>B{<sup>1</sup>H} NMR (128 MHz, CD<sub>2</sub>Cl<sub>2</sub>): δ 26.8 ppm.

HRMS (ESI): *m/z* [M-H]<sup>-</sup> calculated for C<sub>32</sub>H<sub>32</sub>BN<sub>2</sub>O: 471.26187; found: 471.26231 (Δ: 0.92 ppm).

### 1-(2-(Trifluoromethylsulfonyl)phenyl)-NBN-benzo[*f,g*]tetracene, **4o**

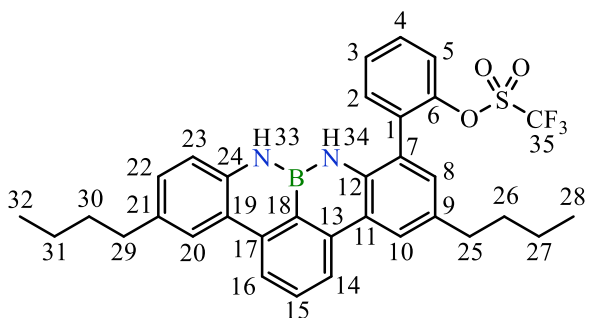

1-(2-Hydroxyphenyl)-NBN-benzo[*f,g*]tetracene (**3o**) (507 mg, 1.07 mmol, 1.00 eq) is dissolved in anhydrous CH<sub>2</sub>Cl<sub>2</sub> (35 mL). Anhydrous pyridine (0.89 mL, 11.1 mmol, 10.3 eq) is added and the solution is cooled to 0 °C. Trifluoromethanesulfonic anhydride (0.44 mL, 2.61 mmol, 2.43 eq) is added dropwise under stirring and the mixture is allowed to warm to r.t.. The reaction is stopped after 2 h by addition of aqueous HCl (3N, 30 mL)

and is extracted with CH<sub>2</sub>Cl<sub>2</sub> (1 x 20 mL, 2 x 10 mL). The combined org. phases are washed with aqueous HCl (1N, 20 mL), sat. aqueous NaHCO<sub>3</sub> (20 mL) and brine (20 mL), dried over MgSO<sub>4</sub> and filtered. The solvent is evaporated under reduced pressure and the crude product is purified by silica gel column chromatography (CHCl<sub>3</sub>/hexane 2:3, R<sub>f</sub> = 0.27) yielding **4o** as a colorless, foam-like solid (587 mg, 0.97 mmol, 90 %); mp 61-62 °C.

<sup>1</sup>H NMR (400 MHz, CD<sub>2</sub>Cl<sub>2</sub>): δ 8.24 (d, <sup>3</sup>J = 8.0 Hz, 1H, H-14), 8.20 (d, <sup>3</sup>J = 8.0 Hz, 1H, H-16), 8.17 (d, <sup>4</sup>J = 1.7 Hz, 1H, H-10), 8.04 (d, <sup>4</sup>J = 1.6 Hz, 1H, H-20), 7.83 (vt, <sup>3</sup>J = 8.0 Hz, 1H, H-15), 7.65-7.57 (m, 3H, H-2, H-3, H-4), 7.56-7.49 (m, 1H, H-5), 7.13 (dd, <sup>3</sup>J = 8.1 Hz, <sup>4</sup>J = 1.6 Hz, 1H, H-22), 7.11 (d, <sup>4</sup>J = 1.7 Hz, 1H, H-8), 6.92 (d, <sup>3</sup>J = 8.1 Hz, 1H, H-23), 6.26 (s, 1H, NH-34), 6.15 (s, 1H, NH-33), 2.80-2.62 (m, 4H, H-25, H-29), 1.76-1.61 (m, 4H, H-26, H-30), 1.49-1.34 (m, 4H, H-27, H-31), 1.00-0.92 (m, 6H, H-28, H-32) ppm.

<sup>13</sup>C{<sup>1</sup>H} NMR (101 MHz, CD<sub>2</sub>Cl<sub>2</sub>): δ 148.5 (C-6), 139.6 (C-17), 139.5 (C-13), 139.0 (C-24), 136.9 (C-12), 134.9 (C-21), 134.1 (C-9), 133.8 (C-2), 133.3 (C-1), 131.5 (C-15), 131.2 (C-8), 130.7 (C-4), 129.7 (C-3), 129.3 (C-22), 127.5 (C-18, determined via 2D spectra), 125.3 (C-10), 124.4 (C-20), 123.8 (C-7), 123.1 (C-11), 122.2 (C-19), 119.6 (C-16), 119.5 (C-14), 118.9 (q, <sup>1</sup>J<sub>CF</sub> = 320 Hz, C-35), 118.6 (C-23), 35.8 (C-29), 35.7 (C-25), 34.8 (C-30), 34.6 (C-26), 23.0 (C-31), 22.8 (C-27), 14.4 (C-32), 14.3 (C-28) ppm.

<sup>11</sup>B{<sup>1</sup>H} NMR (128 MHz, CD<sub>2</sub>Cl<sub>2</sub>): δ 26.8 ppm.

<sup>19</sup>F{<sup>1</sup>H} NMR (376 MHz, CD<sub>2</sub>Cl<sub>2</sub>): δ -74.6 ppm.

HRMS (ESI): *m/z* [M+Na]<sup>+</sup> calculated for C<sub>33</sub>H<sub>32</sub>BF<sub>3</sub>N<sub>2</sub>NaO<sub>3</sub>S: 627.20767; found: 627.20835 (Δ: 1.07 ppm).

### 1-(3-(Trifluoromethylsulfonyl)phenyl)-NBN-benzo[*f,g*]tetracene, **4m**

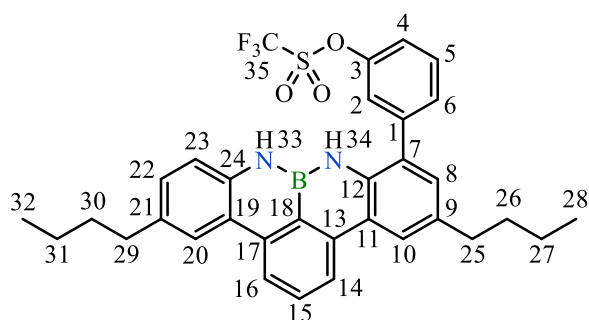

1-(3-Hydroxyphenyl)-NBN-benzo[*f,g*]tetracene (**3m**) (525 mg, 1.11 mmol, 1.00 eq) is dissolved in anhydrous CH<sub>2</sub>Cl<sub>2</sub> (35 mL). Anhydrous pyridine (0.98 mL, 11.4 mmol, 10.3 eq) is added and the solution is cooled to 0 °C. Trifluoromethanesulfonyl anhydride (0.45 mL, 2.70 mmol, 2.43 eq) is added dropwise under stirring and the mixture is allowed to warm to r.t.. The reaction is stopped after 2 h by addition of aqueous HCl (3N, 40 mL) and is

extracted with CH<sub>2</sub>Cl<sub>2</sub> (1 x 30 mL, 2 x 20 mL). The combined org. phases are washed with aqueous HCl (1N, 30 mL), sat. aqueous NaHCO<sub>3</sub> (30 mL) and brine (30 mL), dried over MgSO<sub>4</sub> and filtered. The solvent is evaporated under reduced pressure and the crude product is purified by silica gel column chromatography (CHCl<sub>3</sub>/hexane 2:3, R<sub>f</sub> = 0.58 in CHCl<sub>3</sub>/hexane 1:1) yielding **4m** as a yellow, highly viscous oil (598 mg, 0.99 mmol, 89 %).

<sup>1</sup>H NMR (400 MHz, CD<sub>2</sub>Cl<sub>2</sub>): δ 8.24 (d, <sup>3</sup>J = 8.0 Hz, 1H, H-14), 8.20 (d, <sup>3</sup>J = 8.0 Hz, 1H, H-16), 8.14 (d, <sup>4</sup>J = 1.6 Hz, 1H, H-10), 8.05 (d, <sup>4</sup>J = 1.4 Hz, 1H, H-20), 7.83 (vt, <sup>3</sup>J = 8.0 Hz, 1H, H-15), 7.67 (vt, <sup>3</sup>J = 7.9 Hz, 1H, H-5), 7.61 (ddd, <sup>3</sup>J = 7.9 Hz, <sup>4</sup>J = 1.6 Hz, <sup>4</sup>J = 1.0 Hz, 1H, H-6), 7.50 (dd, <sup>4</sup>J = 2.6 Hz, <sup>4</sup>J = 1.6 Hz, 1H, H-2), 7.40 (ddd, <sup>3</sup>J = 7.9 Hz, <sup>4</sup>J = 2.6 Hz, <sup>4</sup>J = 1.0 Hz, 1H, H-4), 7.14 (dd, <sup>3</sup>J = 8.1 Hz, <sup>4</sup>J = 1.8 Hz, 1H, H-22), 7.12 (d, <sup>4</sup>J = 1.8 Hz, 1H, H-8), 6.95 (d, <sup>3</sup>J = 8.1 Hz, 1H, H-23), 6.50 (s, 1H, NH-34), 6.26 (s, 1H, NH-33), 2.78-2.65 (m, 4H, H-25, H-29), 1.76-1.61 (m, 4H, H-26, H-30), 1.50-1.35 (m, 4H, H-27, H-31), 1.02-0.93 (m, 6H, H-28, H-32) ppm.



$^{13}\text{C}\{^1\text{H}\}$  NMR (101 MHz,  $\text{CD}_2\text{Cl}_2$ ):  $\delta$  150.6 (C-3), 142.7 (C-1), 139.6 (C-17), 139.5 (C-13), 139.0 (C-24), 136.1 (C-12), 134.9 (C-21), 134.5 (C-9), 131.7 (C-5), 131.5 (C-15), 130.6 (C-6), 130.4 (C-8), 129.4 (C-22), 128.7 (C-7), 127.4 (C-18, determined via 2D spectra), 124.9 (C-10), 124.4 (C-20), 123.4 (C-2), 123.0 (C-11), 122.2 (C-19), 120.9 (C-4), 119.6 (C-14), 119.6 (C-16), 119.4 (q,  $^1J_{\text{CF}} = 321$  Hz, C-35), 118.6 (C-23), 35.8 (C-29), 35.8 (C-25), 34.8 (C-30), 34.7 (C-26), 23.0 (C-31), 23.0 (C-27), 14.4 (C-28, C-32) ppm.

$^{11}\text{B}\{^1\text{H}\}$  NMR (128 MHz,  $\text{CD}_2\text{Cl}_2$ ):  $\delta$  26.8 ppm.

$^{19}\text{F}\{^1\text{H}\}$  NMR (376 MHz,  $\text{CD}_2\text{Cl}_2$ ):  $\delta$  -73.1 ppm.

HRMS (ESI):  $m/z$   $[\text{M}+\text{Na}]^+$  calculated for  $\text{C}_{33}\text{H}_{32}\text{BF}_3\text{N}_2\text{NaO}_3\text{S}$ : 627.20767; found: 627.20855 ( $\Delta$ : 1.39 ppm).

### 1-(4-(Trifluoromethylsulfonyl)phenyl)-NBN-benzo[*f,g*]tetracene, **4p**

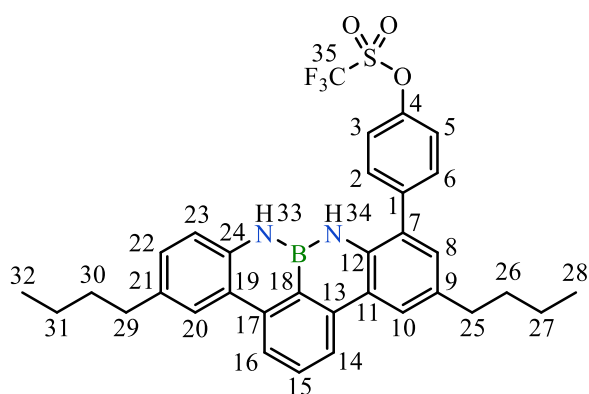

1-(4-Hydroxyphenyl)-NBN-benzo[*f,g*]tetracene (**3p**) (405 mg, 0.86 mmol, 1.00 eq) is dissolved in anhydrous  $\text{CH}_2\text{Cl}_2$  (30 mL). Anhydrous pyridine (0.71 mL, 8.83 mmol, 10.3 eq) is added and the solution is cooled to 0 °C. Trifluoromethanesulfonyl anhydride (0.35 mL, 2.08 mmol, 2.43 eq) is added drop-wise under stirring and the mixture is allowed to warm to r.t.. The reaction is stopped after 2 h by addition of aqueous HCl (3N, 30 mL) and is extracted with  $\text{CH}_2\text{Cl}_2$  (1 x 25 mL, 2 x 15 mL).

The combined org. phases are washed with aqueous HCl (1N, 25 mL), sat. aqueous  $\text{NaHCO}_3$  (25 mL) and brine (25 mL), dried over  $\text{MgSO}_4$  and filtered. The solvent is evaporated under reduced pressure and the crude product is purified by silica gel column chromatography ( $\text{CHCl}_3$ /hexane 1:2,  $R_f = 0.28$ ) yielding **4p** as a colorless, crystalline solid (463 mg, 0.77 mmol, 89 %); mp 161-162 °C.

$^1\text{H}$  NMR (400 MHz,  $\text{CD}_2\text{Cl}_2$ ):  $\delta$  8.24 (d,  $^3J = 8.0$  Hz, 1H, H-14), 8.20 (d,  $^3J = 8.0$  Hz, 1H, H-16), 8.14 (d,  $^4J = 1.6$  Hz, 1H, H-10), 8.05 (d,  $^4J = 1.4$  Hz, 1H, H-20), 7.83 (vt,  $^3J = 8.0$  Hz, 1H, H-15), 7.67 (vt,  $^3J = 7.9$  Hz, 1H, H-5), 7.61 (ddd,  $^3J = 7.9$  Hz,  $^4J = 1.6$  Hz,  $^4J = 1.0$  Hz, 1H, H-6), 7.50 (dd,  $^4J = 2.6$  Hz,  $^4J = 1.6$  Hz, 1H, H-2), 7.40 (ddd,  $^3J = 7.9$  Hz,  $^4J = 2.6$  Hz,  $^4J = 1.0$  Hz, 1H, H-4), 7.14 (dd,  $^3J = 8.1$  Hz,  $^4J = 1.8$  Hz, 1H, H-22), 7.12 (d,  $^4J = 1.8$  Hz, 1H, H-8), 6.95 (d,  $^3J = 8.1$  Hz, 1H, H-23), 6.50 (s, 1H, NH-34), 6.26 (s, 1H, NH-33), 2.78-2.65 (m, 4H, H-25, H-29), 1.76-1.61 (m, 4H, H-26, H-30), 1.50-1.35 (m, 4H, H-27, H-31), 1.02-0.93 (m, 6H, H-28, H-32) ppm.

$^{13}\text{C}\{^1\text{H}\}$  NMR (101 MHz,  $\text{CD}_2\text{Cl}_2$ ):  $\delta$  150.6 (C-3), 142.7 (C-1), 139.6 (C-17), 139.5 (C-13), 139.0 (C-24), 136.1 (C-12), 134.9 (C-21), 134.5 (C-9), 131.7 (C-5), 131.5 (C-15), 130.6 (C-6), 130.4 (C-8), 129.4 (C-22), 128.7 (C-7), 127.4 (C-18, determined via 2D spectra), 124.9 (C-10), 124.4 (C-20), 123.4 (C-2), 123.0 (C-11), 122.2 (C-19), 120.9 (C-4), 119.6 (C-14), 119.6 (C-16), 119.4 (q,  $^1J_{\text{CF}} = 321$  Hz, C-35), 118.6 (C-23), 35.8 (C-29), 35.8 (C-25), 34.8 (C-30), 34.7 (C-26), 23.0 (C-31), 23.0 (C-27), 14.4 (C-28, C-32) ppm.

$^{11}\text{B}\{^1\text{H}\}$  NMR (128 MHz,  $\text{CD}_2\text{Cl}_2$ ):  $\delta$  26.8 ppm.

$^{19}\text{F}\{^1\text{H}\}$  NMR (376 MHz,  $\text{CD}_2\text{Cl}_2$ ):  $\delta$  -73.1 ppm.

HRMS (ESI):  $m/z$   $[\text{M}+\text{Na}]^+$  calculated for  $\text{C}_{33}\text{H}_{32}\text{BF}_3\text{N}_2\text{NaO}_3\text{S}$ : 627.20767; found: 627.20855 ( $\Delta$ : 1.39 ppm).



**4,7,12,15-Tetra[NBN-benzo[*f,g*]tetracen-1-ylethynyl][2.2]paracyclophane, rac-6, (R)-6, (S)-6.**

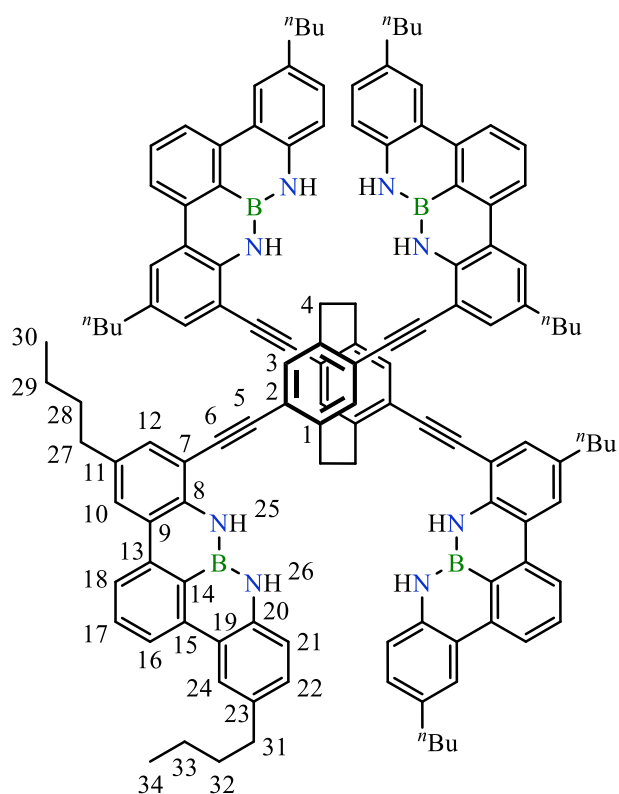

Synthesis and purification are performed in the dark or under red light. 4,7,12,15-Tetraethynyl[2.2]paracyclophane rac-5 (30.4 mg, 0.10 mmol, 1.00 eq), 1-bromo-NBN-benzo[*f,g*]tetracene (2) (202 mg, 0.44 mmol, 4.40 eq), CuI (4.2 mg, 22  $\mu$ mol 0.22 eq), Pd<sub>2</sub>(dba)<sub>3</sub> (12.8 mg, 11  $\mu$ mol 0.11 eq) and (*t*-Bu)<sub>3</sub>PH·BF<sub>4</sub> (12.8 mg, 44  $\mu$ mol, 0.44 eq) are suspended in dry, degassed THF/Et<sub>3</sub>N (4 ml, 1:1 v/v). The reaction mixture is stirred at 50 °C for 18 h in a flask wrapped with aluminum foil to exclude daylight. The mixture is allowed to cool to r.t. and the solvent is removed under reduced pressure. The residue is suspended in CH<sub>2</sub>Cl<sub>2</sub> and filtered through a Celite plug. The orange filtrate is evaporated to dryness and the crude product is purified by silica column chromatography (CHCl<sub>3</sub>/hexane 2:3→1:1→3:2, R<sub>f</sub> = 0.23 in CHCl<sub>3</sub>/hexane 1:1) yielding rac-6 as a yellow solid (149 mg, 82  $\mu$ mol, 82 %); mp > 299 °C. Enantiopure (R)-6 and (S)-6 are obtained by

a similar procedure starting from (R)-5 and (S)-5 in 79 % and 80 % yield, respectively. [ $\alpha$ ]<sub>589</sub><sup>20</sup> (c 0.50, CHCl<sub>3</sub>) +1192° for (R)-6 and -1189° for (S)-6.

<sup>1</sup>H NMR (CDCl<sub>3</sub>, 400 MHz):  $\delta$  7.76 (d, <sup>3</sup>J = 8.0 Hz, 4H, H-16), 7.72-7.69 (m, 8H, H-10, H-24), 7.52 (d, <sup>4</sup>J = 1.6 Hz, 4H, H-12), 7.49 (s, 4H, H-3), 7.42 (d, <sup>3</sup>J = 8.0 Hz, 4H, H-18), 7.34 (vt, <sup>3</sup>J = 8.0 Hz, 4H, H-17), 7.01 (dd, <sup>3</sup>J = 8.0 Hz, <sup>4</sup>J = 1.6 Hz, 4H, H-22), 6.99 (s, 4H, NH-25), 6.41 (d, <sup>3</sup>J = 8.0 Hz, 4H, H-21), 5.59 (s, 4H, NH-26), 3.99-3.83 (m, 4H, H-4a), 3.55-3.41 (m, 4H, H-4b), 2.80-2.67 (m, 16H, H-25, H-27), 1.83-1.72 (m, 16H, H-26, H-28), 1.59-1.48 (m, 16H, H-33, H-29, superimposed with H<sub>2</sub>O from solvent), 1.09 (s, 12H, H-34), 1.06 (s, 12H, H-30) ppm.

<sup>13</sup>C{<sup>1</sup>H} NMR (CDCl<sub>3</sub>, 101 MHz):  $\delta$  141.7 (C-2), 139.9 (C-8), 138.3 (C-13), 138.0 (C-20), 137.7 (C-15), 134.5 (C-3), 133.7 (C-23), 133.1 (C-11), 131.0 (C-12), 130.0 (C-17), 127.8 (C-22), 126.6 (C-14), 125.9 (C-10), 125.5 (C-1), 123.5 (C-24), 122.7 (C-9), 121.9 (C-19), 119.0 (C-16), 118.3 (C-18), 118.2 (C-21), 110.2 (C-7), 95.8 (C-5), 92.2 (C-6), 35.6 (C-31), 35.4 (C-27), 34.6 (C-32), 34.2 (C-28), 33.1 (C-4), 22.7 (C-33), 22.7 (C-29), 14.3 (C-34), 14.3 (C-30) ppm.

<sup>11</sup>B{<sup>1</sup>H} NMR (CDCl<sub>3</sub>, 128 MHz):  $\delta$  28.3 ppm.

HRMS (ESI): *m/z* [M+H]<sup>+</sup> calculated for C<sub>128</sub>H<sub>125</sub>B<sub>4</sub>N<sub>8</sub>: 1818.03939; found: 1818.04292 ( $\Delta$ : 1.09 ppm).

**4,7,12,15-Tetra[NBN-benzo[*f,g*]tetracen-1-yl-phen-3-yl-ethynyl][2.2]paracyclophane, rac-**7m**, (R)-**7m**, (S)-**7m**.**

Synthesis and purification are performed in the dark or under red light. 4,7,12,15-Tetraethynyl[2.2]paracyclophane rac-**5** (22.9 mg, 75.2  $\mu\text{mol}$ , 1.00 eq), 1-(3-(trifluoromethylsulfonyl)phenyl)-NBN-benzo[*f,g*]tetracene (**4m**) (200 mg, 330  $\mu\text{mol}$ , 4.40 eq), CuI (2.9 mg, 15  $\mu\text{mol}$  0.20 eq) and PdCl<sub>2</sub>(dppf) (11.0 mg, 15  $\mu\text{mol}$  0.20 eq) are suspended in

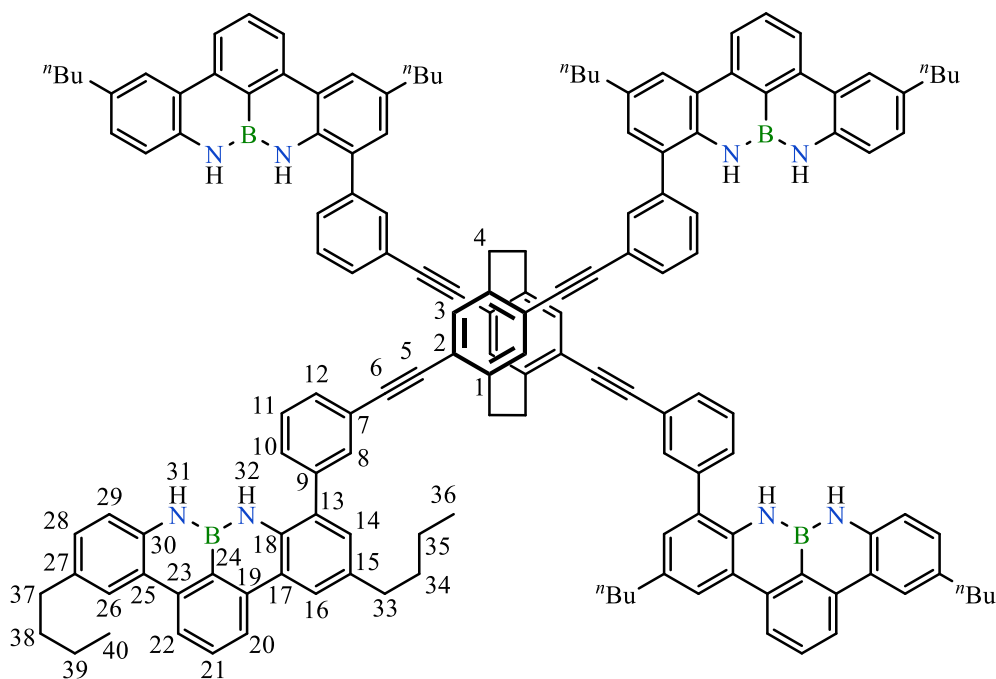

dry, degassed THF/Et<sub>3</sub>N (2.6 ml, 1:1 v/v). The reaction mixture is stirred at 50 °C for 18 h in a flask wrapped with aluminum foil to exclude daylight. The mixture is allowed to cool to r.t. and the solvent is removed under reduced pressure. The residue is suspended in

CH<sub>2</sub>Cl<sub>2</sub> and filtered through a Celite plug. The filtrate is evaporated to dryness and the crude product is purified by silica column chromatography (CH<sub>2</sub>Cl<sub>2</sub>/hexane 7:10, R<sub>f</sub> = 0.60) yielding rac-**7m** as a pale yellow solid (82 mg, 47  $\mu\text{mol}$ , 63 %); mp 169-170 °C. Enantiopure (R)-**7m** and (S)-**7m** are obtained by a similar procedure starting from (R)-**5** and (S)-**5** in 64 % and 61 % yield, respectively.

<sup>1</sup>H NMR (400 MHz, CD<sub>2</sub>Cl<sub>2</sub>):  $\delta$  8.22 (d, <sup>3</sup>J = 8.0 Hz, 4H, H-20), 8.17 (d, <sup>3</sup>J = 8.0 Hz, 4H, H-22), 8.09 (d, <sup>4</sup>J = 1.3 Hz, 4H, H-16), 8.01 (d, <sup>4</sup>J = 1.4 Hz, 4H, H-26), 7.81 (vt, <sup>3</sup>J = 8.0 Hz, 4H, H-21), 7.72 (vt, <sup>4</sup>J = 1.6 Hz, 4H, H-8), 7.62 (dvt, <sup>3</sup>J = 7.6 Hz, <sup>4</sup>J = 1.6 Hz, 4H, H-12), 7.39 (dvt, <sup>3</sup>J = 7.6 Hz, <sup>4</sup>J = 1.6 Hz, 4H, H-10), 7.35 (s, <sup>3</sup>J = 7.6 Hz, 4H, H-3), 7.08 (d, <sup>4</sup>J = 1.8 Hz, 4H, H-14), 7.06 (dd, <sup>3</sup>J = 8.1 Hz, <sup>4</sup>J = 1.4 Hz, 4H, H-28), 6.80 (d, <sup>3</sup>J = 8.1 Hz, 4H, H-29), 6.51 (s, 4H, NH-32), 6.18 (s, 4H, NH-31), 3.65-3.54 (m, 4H, H-4a), 3.21-3.08 (m, 4H, H-4b), 2.75-2.61 (m, 16H, H-33, H-37), 1.74-1.57 (m, 16H, H-34, H-38), 1.48-1.33 (m, 16H, H-35, H-39), 0.99-0.91 (m, 16H, H-36, H-40) ppm.

<sup>13</sup>C{<sup>1</sup>H} NMR (101 MHz, CD<sub>2</sub>Cl<sub>2</sub>):  $\delta$  142.2 (C-2), 139.8 (C-9), 139.1 (C-17), 139.0 (C-23), 138.5 (C-30), 135.7 (C-18), 134.8 (C-3), 134.2 (C-27), 133.7 (C-15), 132.6 (C-8), 130.9 (C-21), 130.6 (C-12), 130.0 (C-10), 129.9 (C-11), 129.5 (C-13), 129.4 (C-14), 128.7 (C-28), 126.9 (C-24), 125.3 (C-1), 124.2 (C-7), 123.8 (C-16, C-26), 122.2 (C-17), 121.6 (C-25), 119.0 (C-20), 118.8 (C-22), 118.0 (C-29), 94.6 (C-6), 89.7 (C-5), 35.2 (C-33, C-37), 34.2 (C-34), 34.1 (C-38), 22.5 (C-35), 22.4 (C-39), 13.8 (C-36), 13.8 (C-40) ppm.

<sup>11</sup>B{<sup>1</sup>H} NMR (128 MHz, CD<sub>2</sub>Cl<sub>2</sub>):  $\delta$  27.3 ppm.

HRMS (ESI): *m/z* [M]<sup>+</sup> calculated for C<sub>152</sub>H<sub>140</sub>B<sub>4</sub>N<sub>8</sub>: 2121.16286; found: 2121.16190 ( $\Delta$ : 0.46 ppm).

**4,7,12,15-Tetra[NBN-benzo[*f,g*]tetracen-1-yl-phen-4-yl-ethynyl][2.2]paracyclophane, rac-7p, (R)-7p, (S)-7p.**

Synthesis and purification are performed in the dark or under red light. 4,7,12,15-Tetraethynyl[2.2]paracyclophane rac-5 (17.2 mg, 56.4  $\mu\text{mol}$ , 1.00 eq), 1-(4-(trifluoromethylsulfonyl)phenyl)-NBN-benzo[*f,g*]tetracene 4p (150 mg, 248  $\mu\text{mol}$ , 4.40 eq), CuI (2.1 mg, 11  $\mu\text{mol}$  0.20 eq) and PdCl<sub>2</sub>(dppf) (8.3 mg, 11  $\mu\text{mol}$  0.20 eq) are suspended in

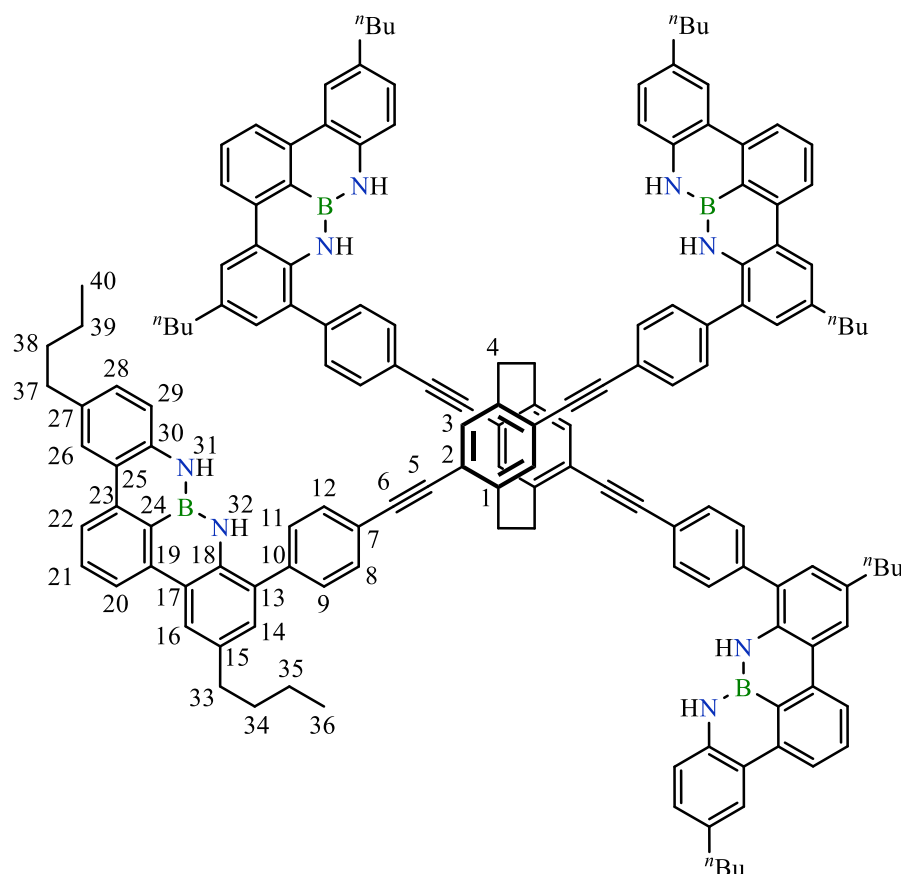

dry, degassed THF/Et<sub>3</sub>N (2.0 ml, 1:1 v/v). The reaction mixture is stirred at 50 °C for 18 h in a flask wrapped with aluminum foil to exclude daylight. The mixture is allowed to cool to r.t. and the solvent is removed under reduced pressure. The residue is suspended in CH<sub>2</sub>Cl<sub>2</sub> and filtered through a Celite plug. The filtrate is evaporated to dryness and the crude product is purified by silica column chromatography (CH<sub>2</sub>Cl<sub>2</sub>/hexane 7:10, R<sub>f</sub> = 0.64) yielding

rac-7p as a green-yellow solid (73 mg, 34  $\mu\text{mol}$ , 61 %); mp 160-162 °C. Enantiopure (R)-7p and (S)-7p are obtained by a similar procedure starting from (R)-5 and (S)-5 in 62 % and 61 % yield, respectively.

<sup>1</sup>H NMR (400 MHz, CD<sub>2</sub>Cl<sub>2</sub>):  $\delta$  8.23 (d, <sup>3</sup>J = 8.1 Hz, 4H, H-20), 8.18 (d, <sup>3</sup>J = 8.1 Hz, 4H, H-22), 8.11 (d, <sup>4</sup>J = 2.0 Hz, 4H, H-16), 8.02 (d, <sup>4</sup>J = 1.9 Hz, 4H, H-26), 7.93-7.86 (m, 8H, H-8, H-12), 7.82 (vt, <sup>3</sup>J = 8.1 Hz, 4H, H-21), 7.68-7.62 (m, 8H, H-9, H-11), 7.36 (s, 4H, H-3), 7.15 (d, <sup>4</sup>J = 2.0 Hz, 4H, H-14), 7.04 (dd, <sup>3</sup>J = 8.2, <sup>4</sup>J = 1.9 Hz, 4H, H-28), 6.86 (d, <sup>3</sup>J = 8.2 Hz, 4H, H-29), 6.63 (s, 4H, NH-32), 6.24 (s, 4H, NH-31), 3.84-3.70 (m, 4H, H-4a), 3.39-3.24 (m, 4H, H-4b), 2.76-2.61 (m, 16H, H-33, H-37), 1.74-1.57 (m, 16H, H-34, H-38), 1.47-1.34 (m, 16H, H-35, H-39), 0.99-0.91 (m, 24H, H-36, H-40) ppm.

<sup>13</sup>C{<sup>1</sup>H} NMR (101 MHz, CD<sub>2</sub>Cl<sub>2</sub>):  $\delta$  142.9 (C-2), 140.4 (C-10), 139.7 (C-19), 139.6 (C-23), 139.0 (C-30), 136.2 (C-18), 135.3 (C-3), 134.8 (C-27), 134.4 (C-15), 132.9 (C-8 + C-12), 131.4 (C-21), 130.7 (C-9, C-11), 130.4 (C-14), 130.3 (C-13), 129.3 (C-28), 127.5 (C-24), 125.8 (C-1), 124.4 (C-16), 124.3 (C-26), 123.3 (C-7), 122.8 (C-17), 122.2 (C-25), 119.6 (C-20), 119.4 (C-22), 118.5 (C-29), 95.2 (C-6), 90.4 (C-5), 35.8 (C-33, C-37), 34.7 (C-38), 34.7 (C-34), 33.4 (C-4), 23.0 (C-39), 23.0 (C-33), 14.4 (C-36, C-40) ppm.

<sup>11</sup>B{<sup>1</sup>H} NMR (128 MHz, CD<sub>2</sub>Cl<sub>2</sub>):  $\delta$  26.8 ppm.

HRMS (ESI): *m/z* [M]<sup>+</sup> calculated for C<sub>152</sub>H<sub>140</sub>B<sub>4</sub>N<sub>8</sub>: 2121.16286; found: 2121.16218 ( $\Delta$ : 0.33 ppm).

## 2. Spectra: NMR & mass

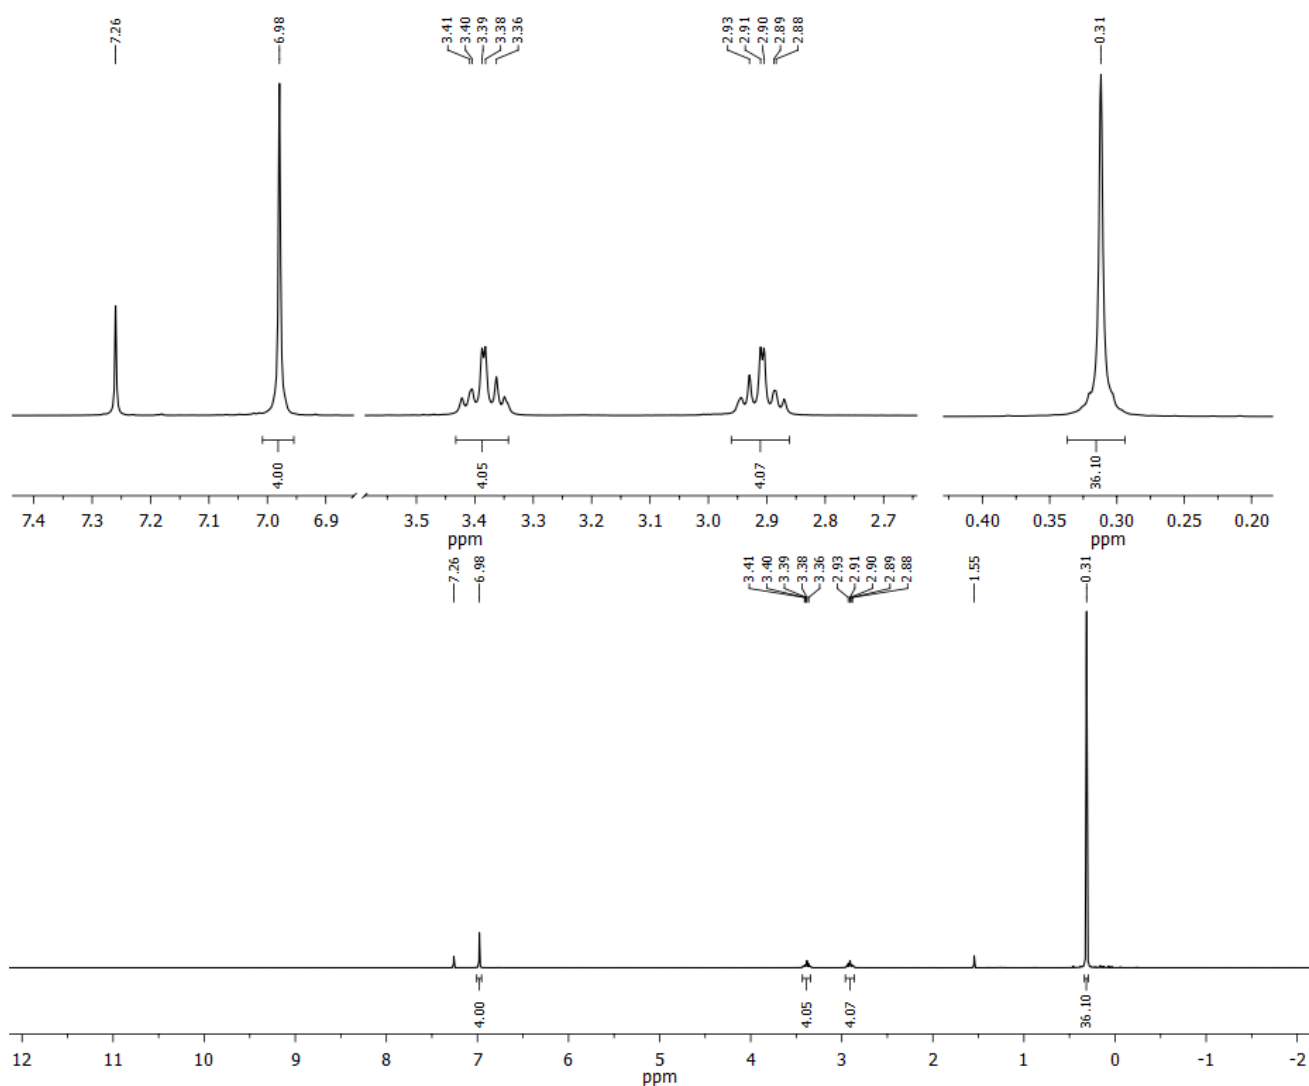

**Figure S1.**  $^1\text{H}$  NMR (400 MHz,  $\text{CDCl}_3$ ) of 4,7,12,15-tetra(trimethylsilylethynyl)[2.2]paracyclophane.

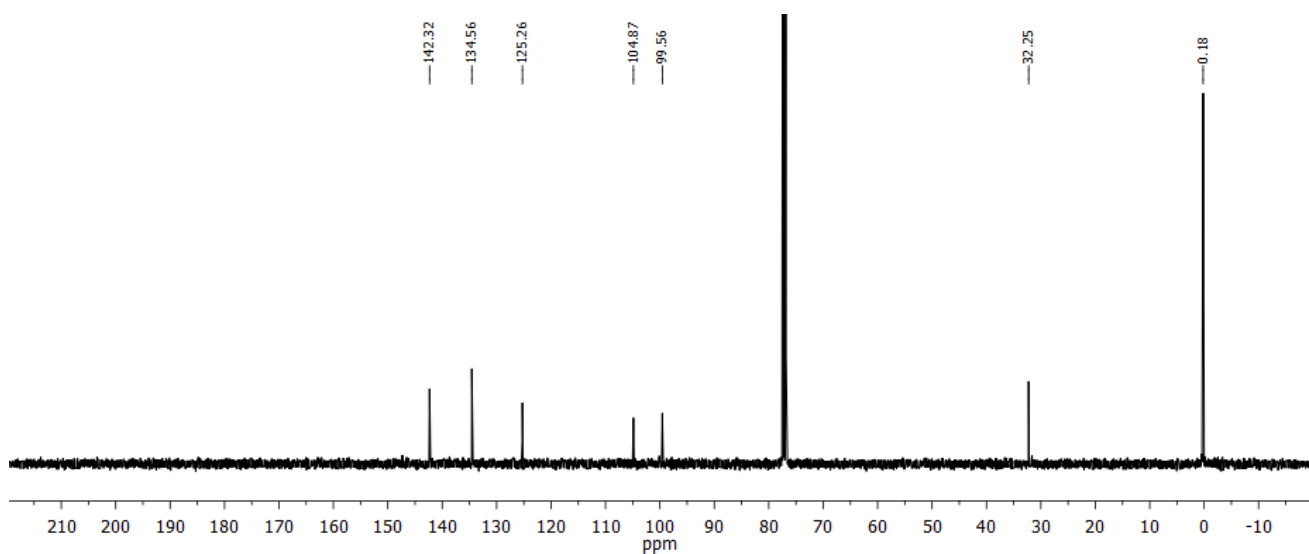

**Figure S2.**  $^{13}\text{C}\{^1\text{H}\}$  NMR (101 MHz,  $\text{CDCl}_3$ ) of 4,7,12,15-tetra(trimethylsilylethynyl)[2.2]paracyclophane.

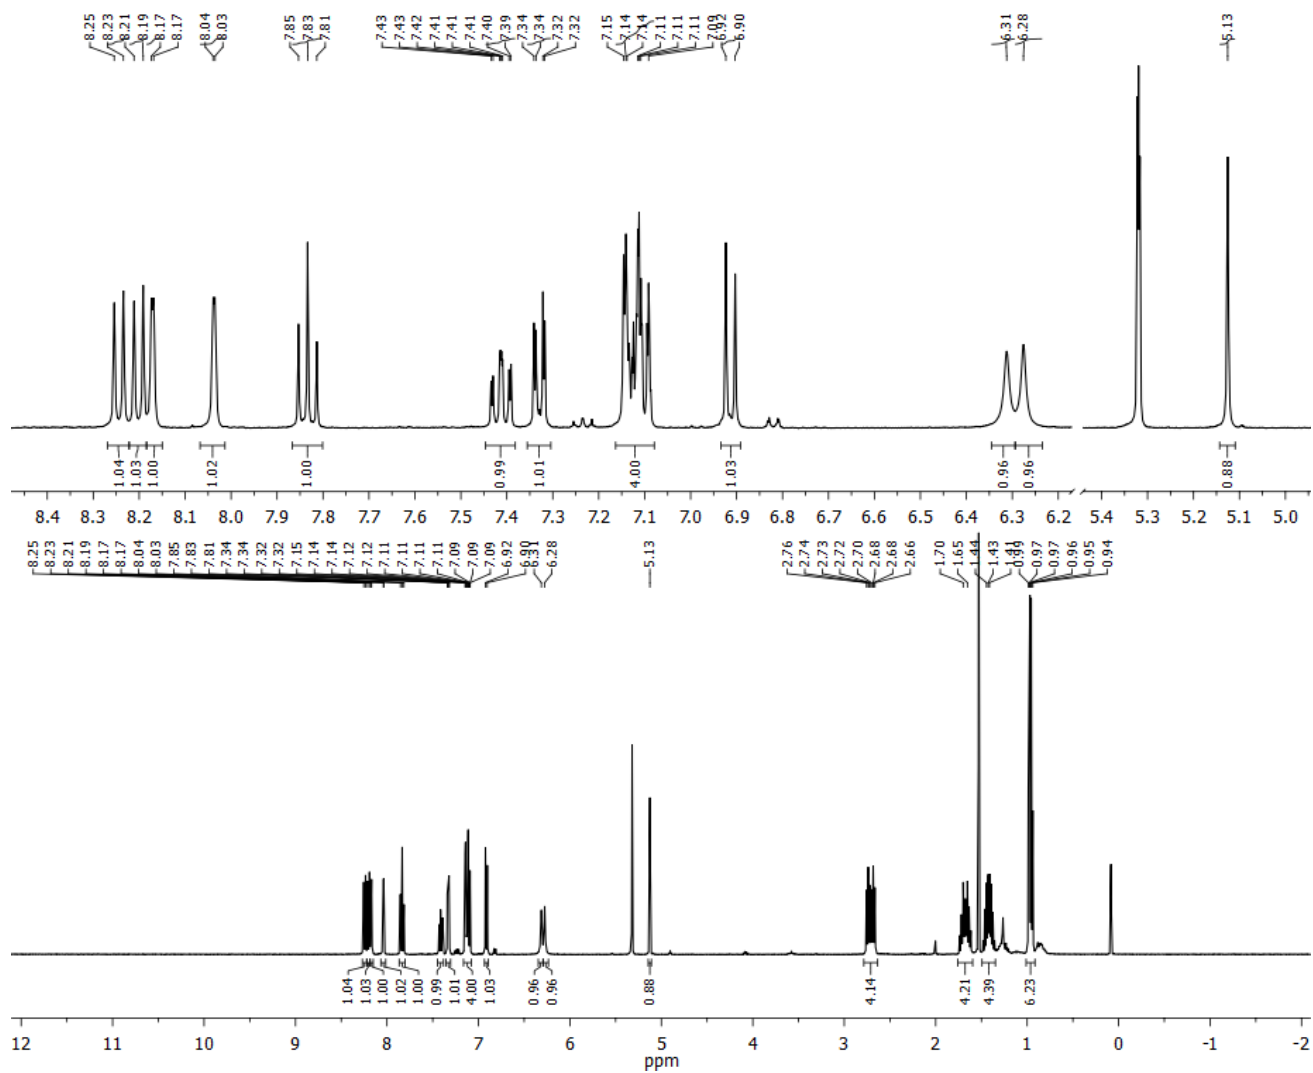

Figure S3.  $^1\text{H}$  NMR (400 MHz,  $\text{CD}_2\text{Cl}_2$ ) of **3o**.

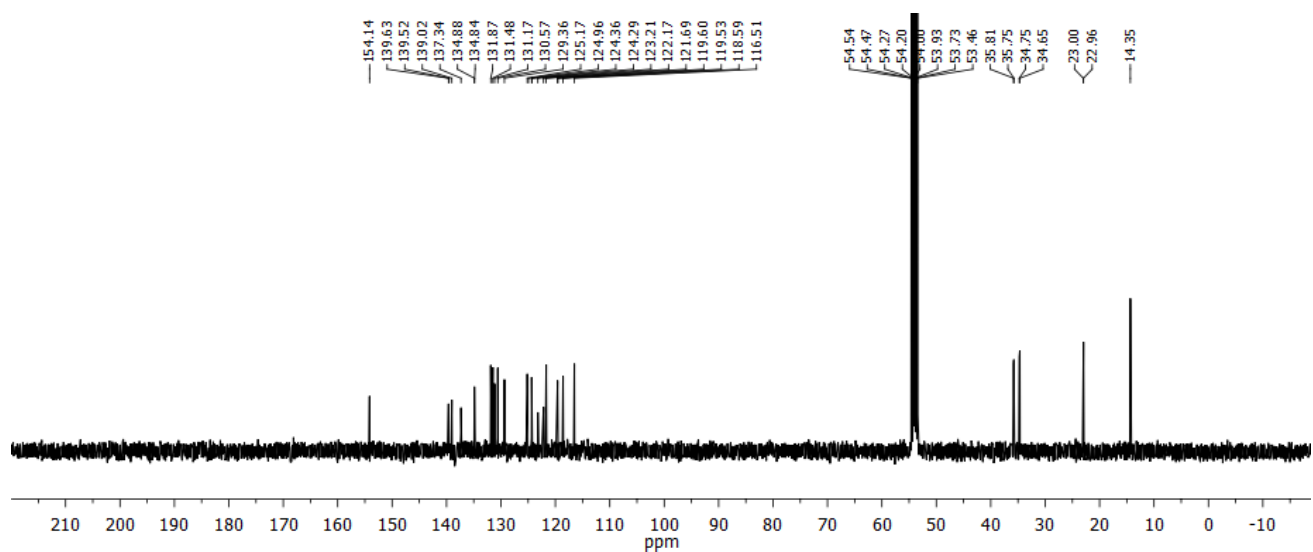

Figure S4.  $^{13}\text{C}\{^1\text{H}\}$  NMR (101 MHz,  $\text{CD}_2\text{Cl}_2$ ) of **3o**.

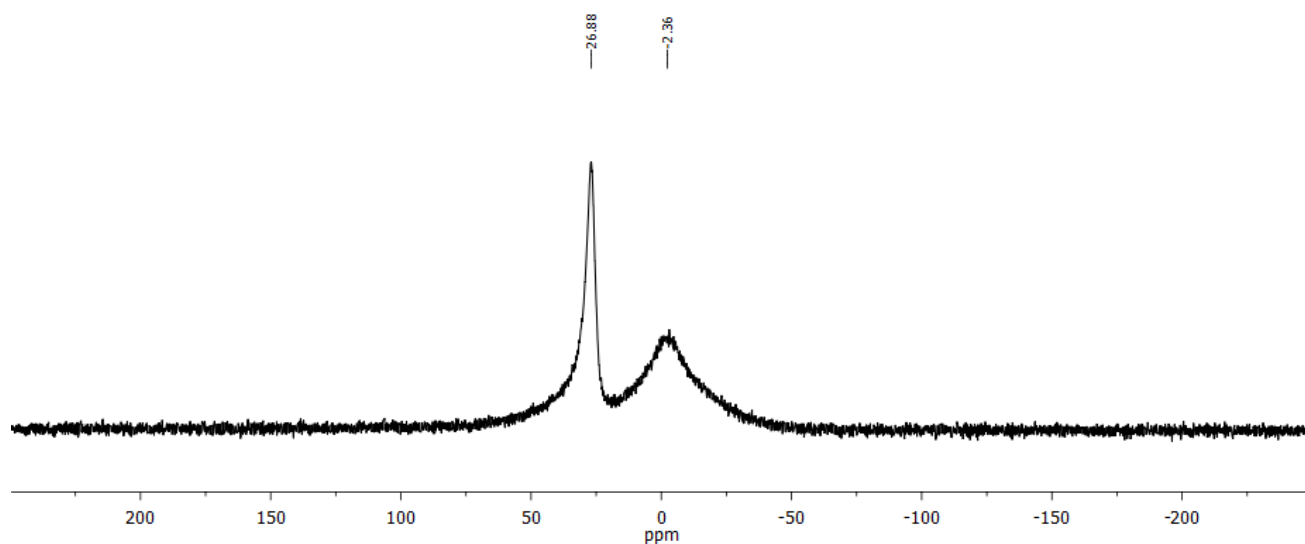

**Figure S5.**  $^{11}\text{B}\{^1\text{H}\}$  NMR (128 MHz,  $\text{CD}_2\text{Cl}_2$ ) of **3o**. Signal at  $\delta$  -2.36 ppm is related to the NMR tube glass.

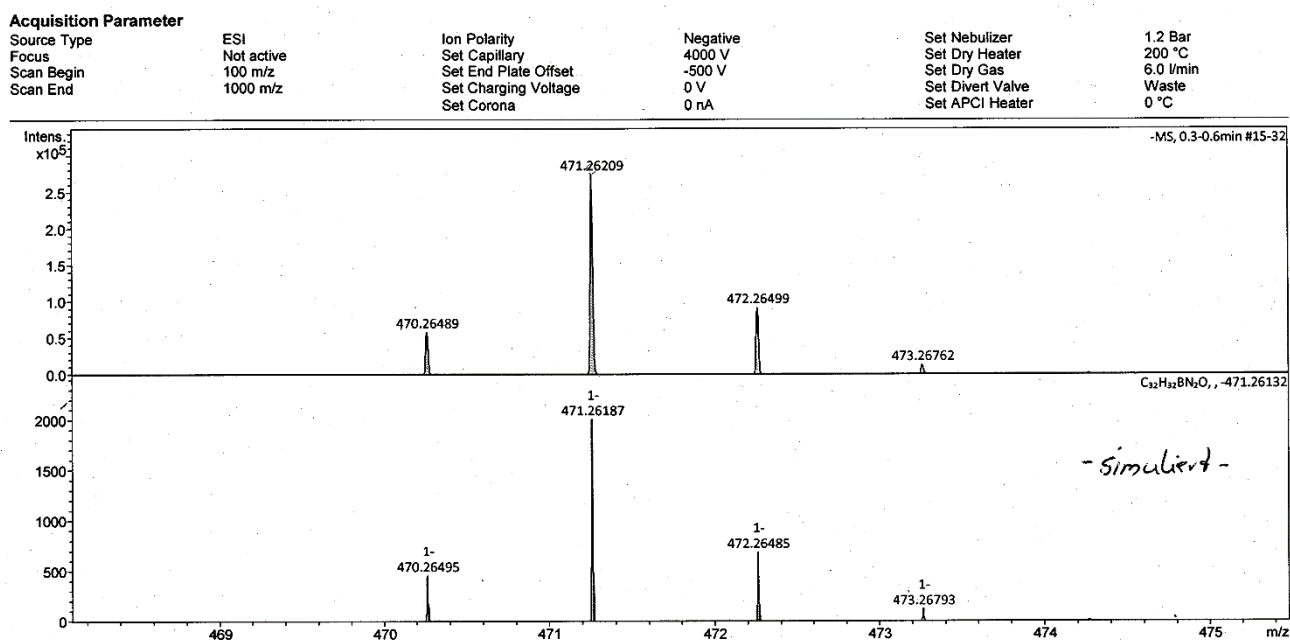

**Figure S6.** Experimental HR ESI-MS of **3o** (top) and theoretical isotopic envelope for  $\text{C}_{32}\text{H}_{32}\text{BN}_2\text{O}$   $[\text{M}-\text{H}]^-$  (bottom).

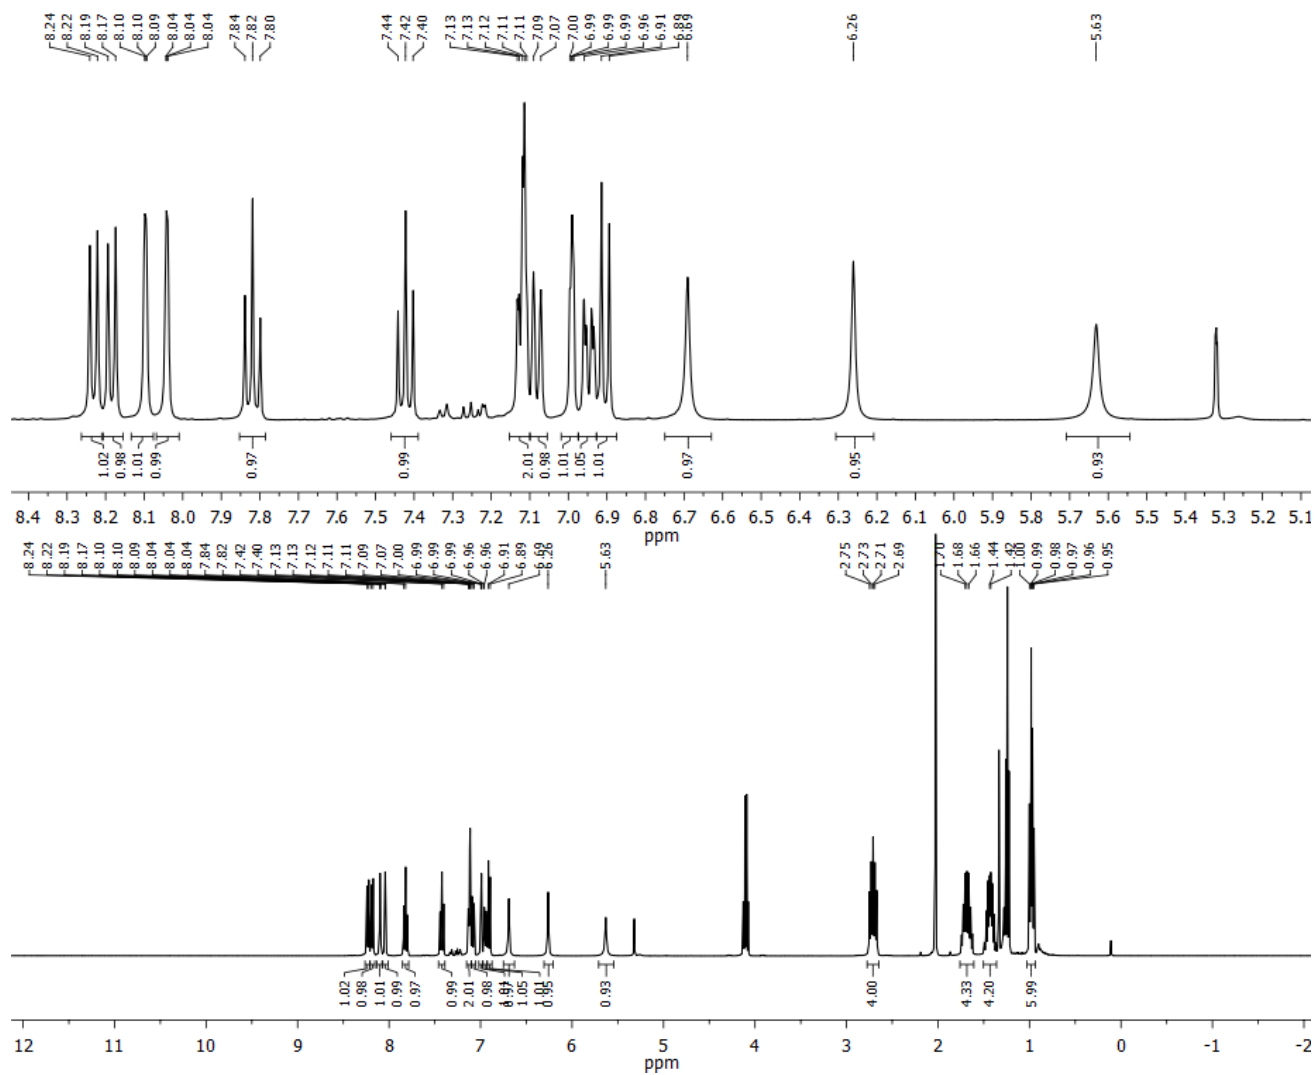

**Figure S7.**  $^1\text{H}$  NMR (400 MHz,  $\text{CD}_2\text{Cl}_2$ ) of **3m**.

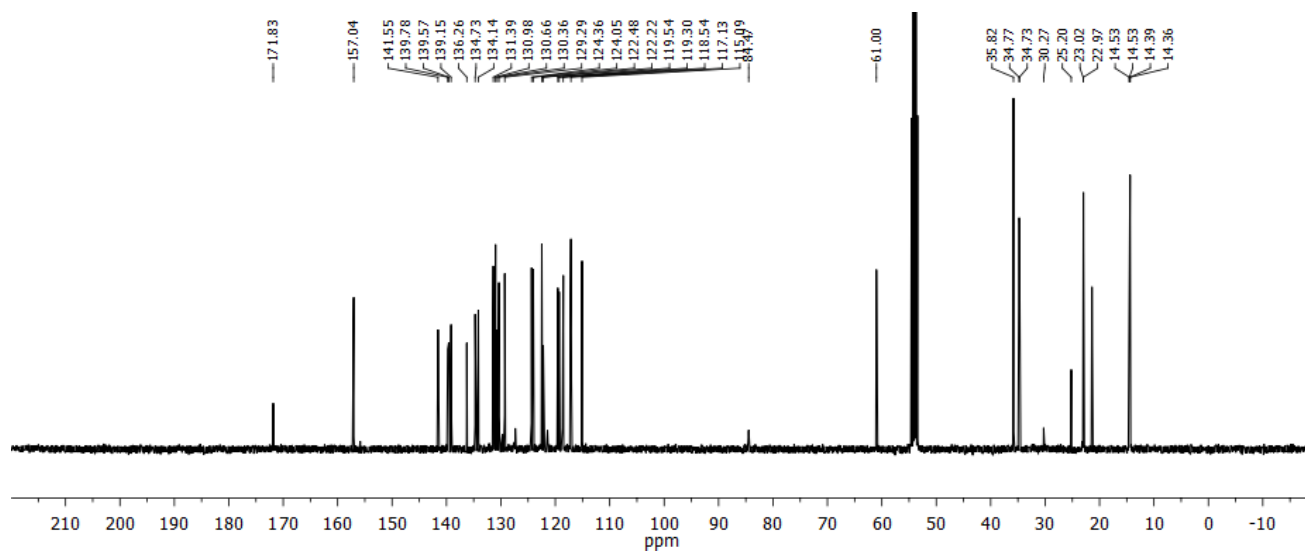

**Figure S8.**  $^{13}\text{C}\{^1\text{H}\}$  NMR (101 MHz,  $\text{CD}_2\text{Cl}_2$ ) of **3m**.



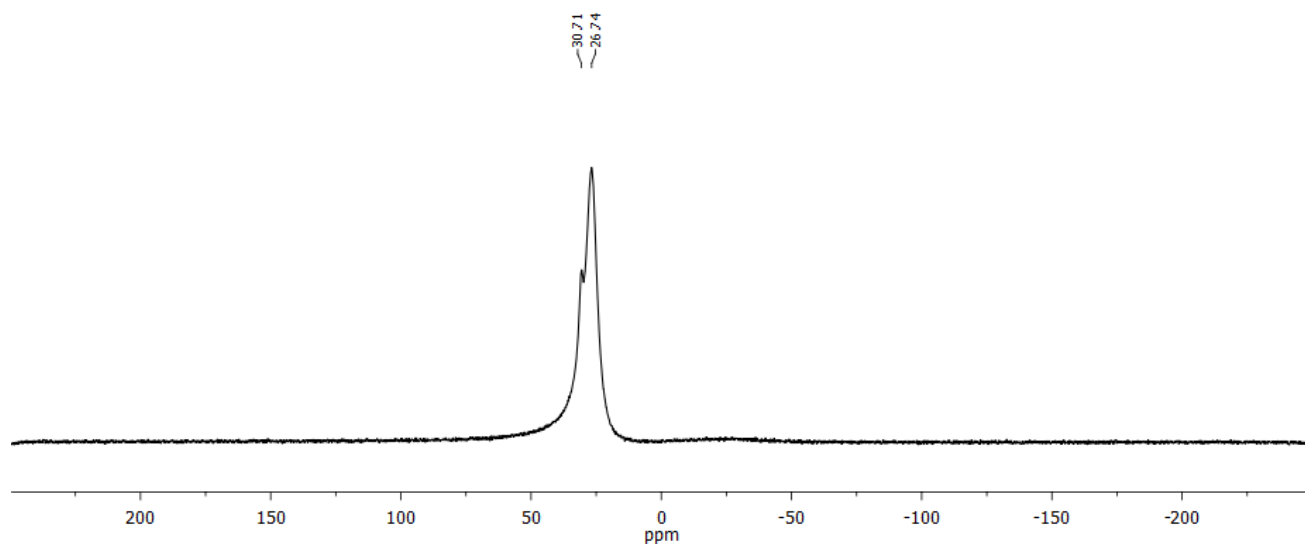

**Figure S9.**  $^{11}\text{B}\{^1\text{H}\}$  NMR (128 MHz,  $\text{CD}_2\text{Cl}_2$ ) of **3m**.

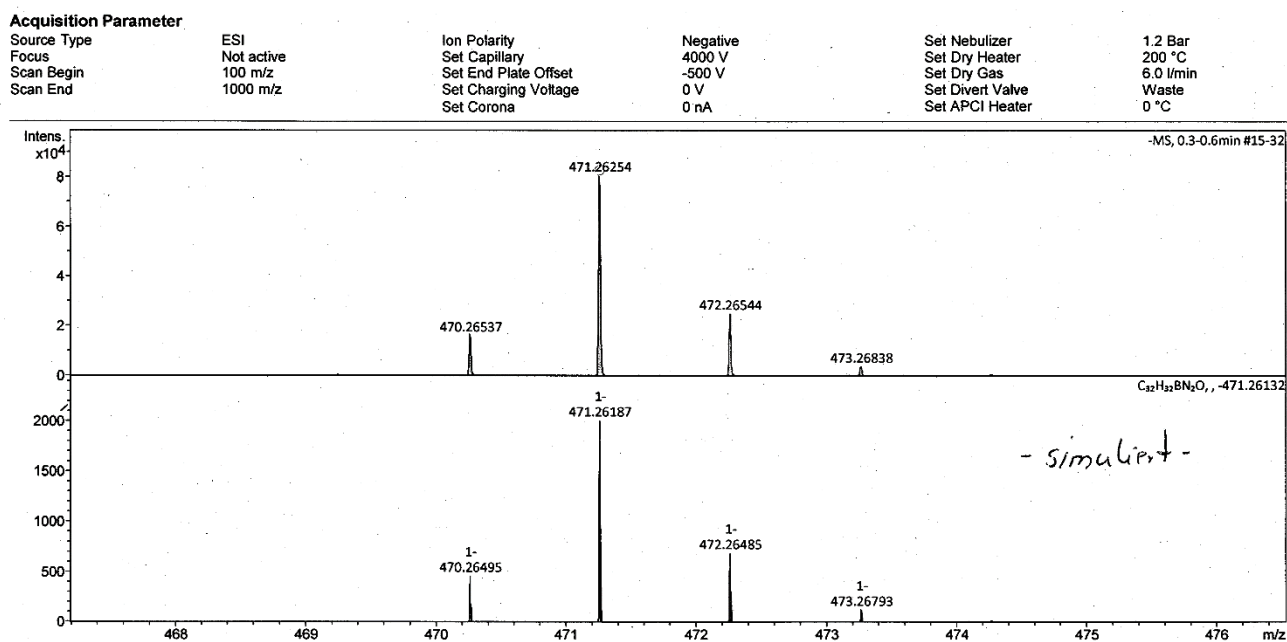

**Figure S10.** Experimental HR ESI-MS of **3m** (top) and theoretical isotopic envelope for  $\text{C}_{32}\text{H}_{32}\text{BN}_2\text{O}$   $[\text{M}-\text{H}]^-$  (bottom).

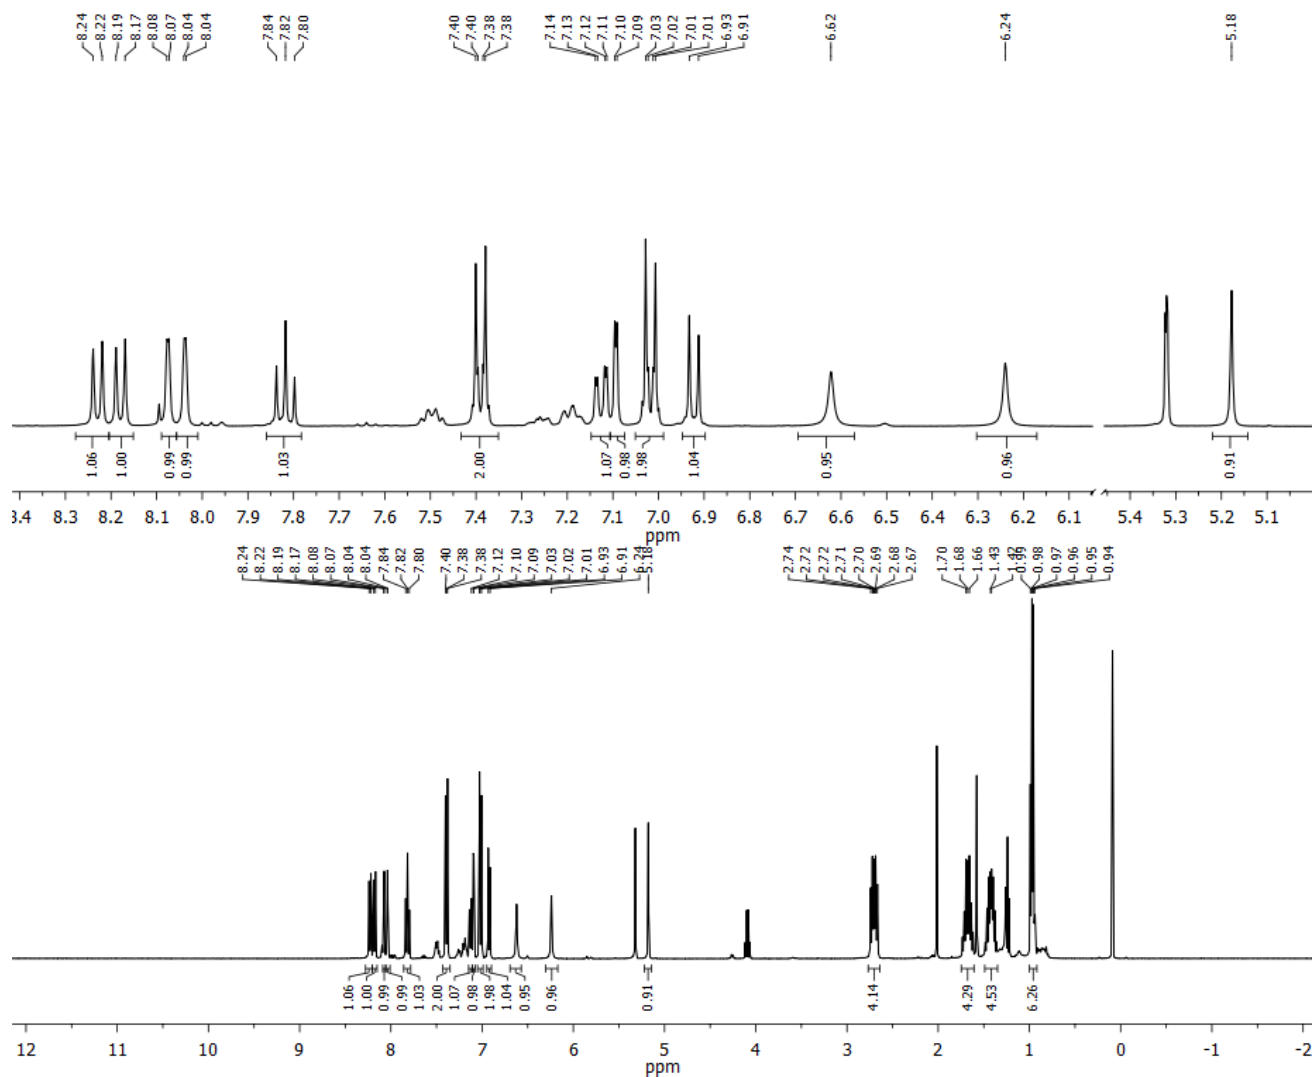

Figure S11.  $^1\text{H}$  NMR (400 MHz,  $\text{CD}_2\text{Cl}_2$ ) of **3p**.

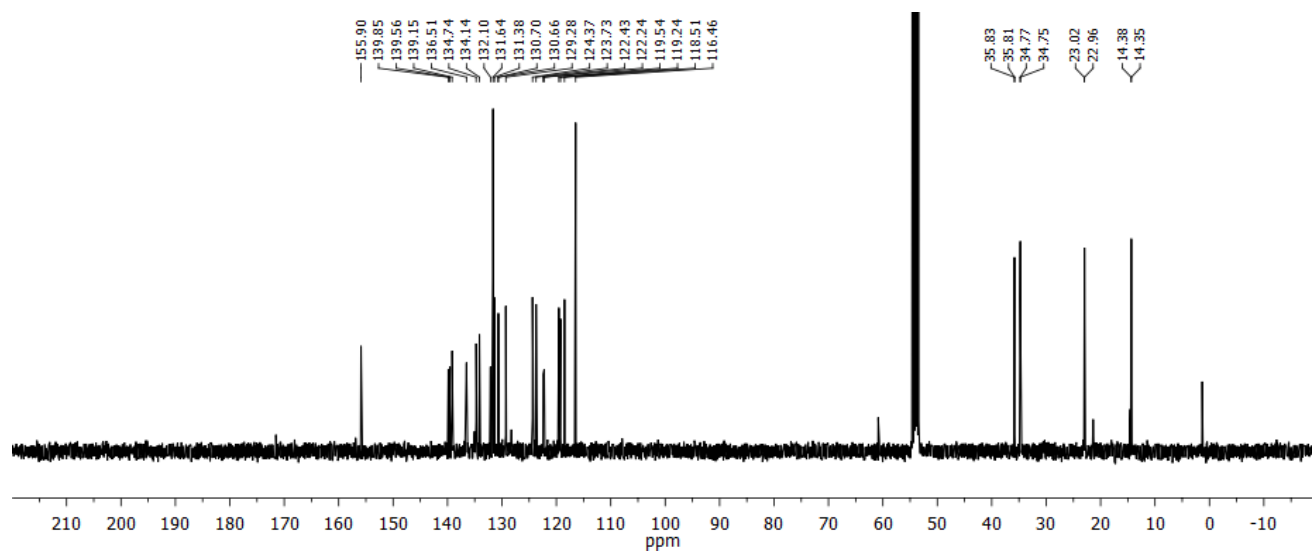

Figure S12.  $^{13}\text{C}\{^1\text{H}\}$  NMR (101 MHz,  $\text{CD}_2\text{Cl}_2$ ) of **3p**.

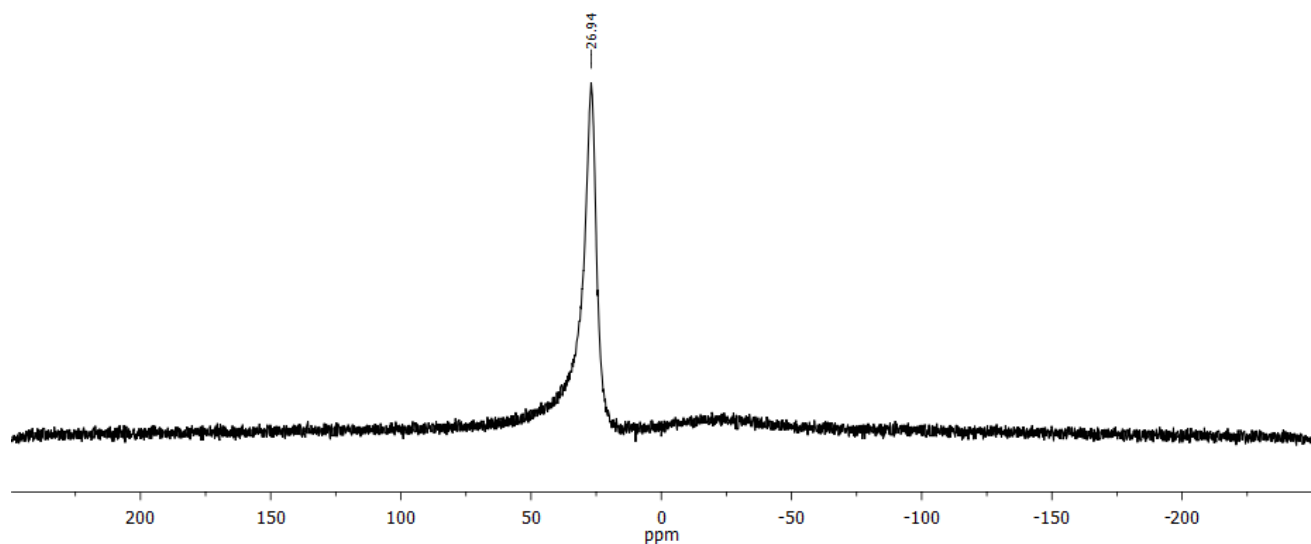

**Figure S13.**  $^{11}\text{B}\{^1\text{H}\}$  NMR (128 MHz,  $\text{CD}_2\text{Cl}_2$ ) of **3p**.

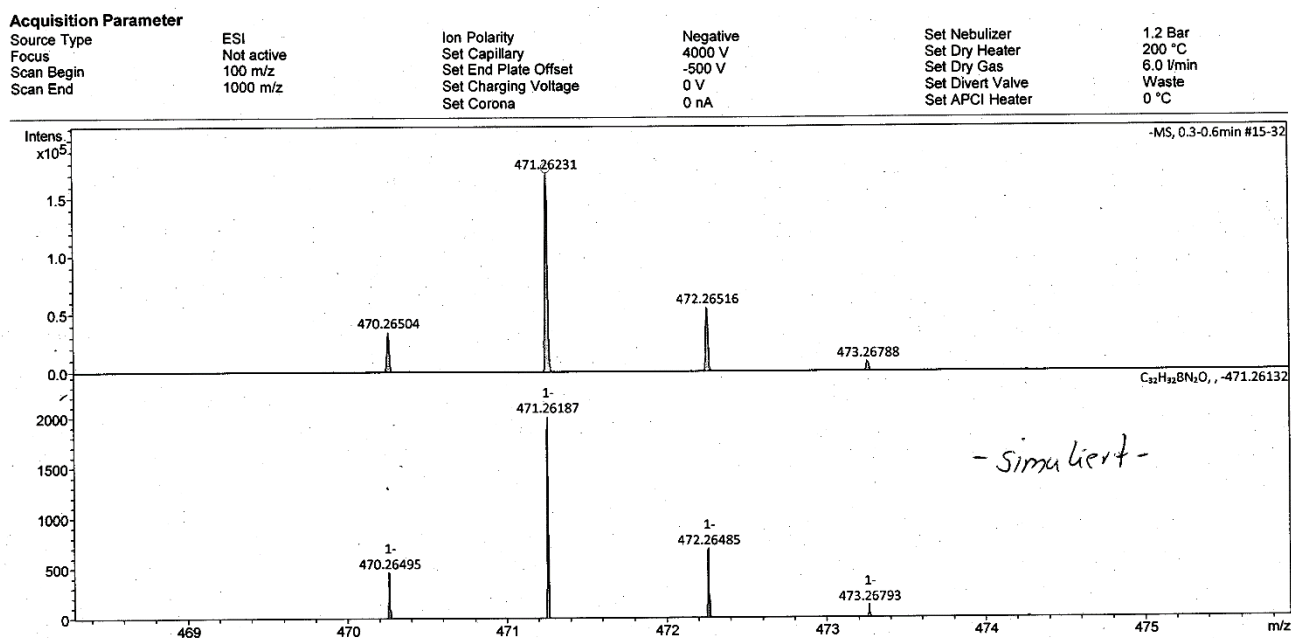

**Figure S14.** Experimental HR ESI-MS of **3p** (top) and theoretical isotopic envelope for  $\text{C}_{32}\text{H}_{32}\text{BN}_2\text{O} [\text{M}-\text{H}]^-$  (bottom).

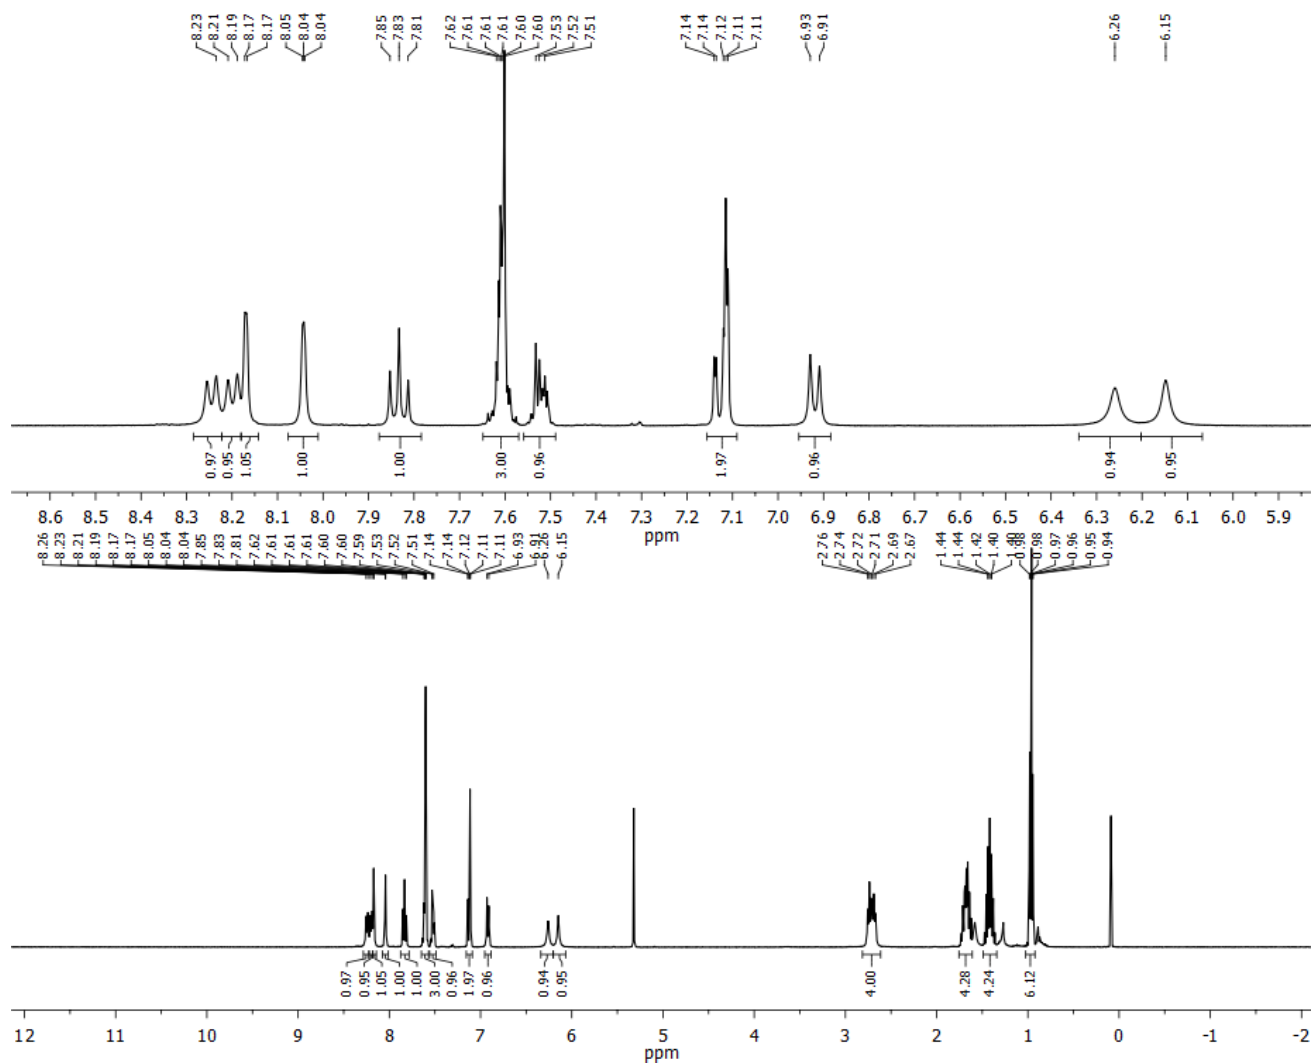

Figure S15.  $^1\text{H}$  NMR (400 MHz,  $\text{CD}_2\text{Cl}_2$ ) of **4o**.

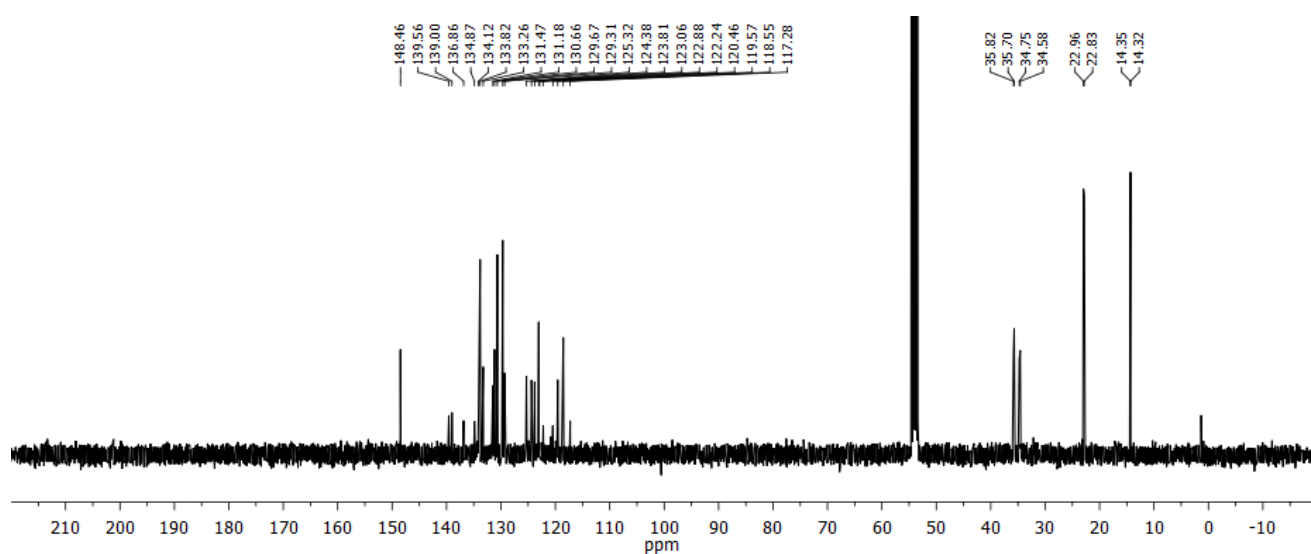

Figure S16.  $^{13}\text{C}\{^1\text{H}\}$  NMR (101 MHz,  $\text{CD}_2\text{Cl}_2$ ) of **4o**.

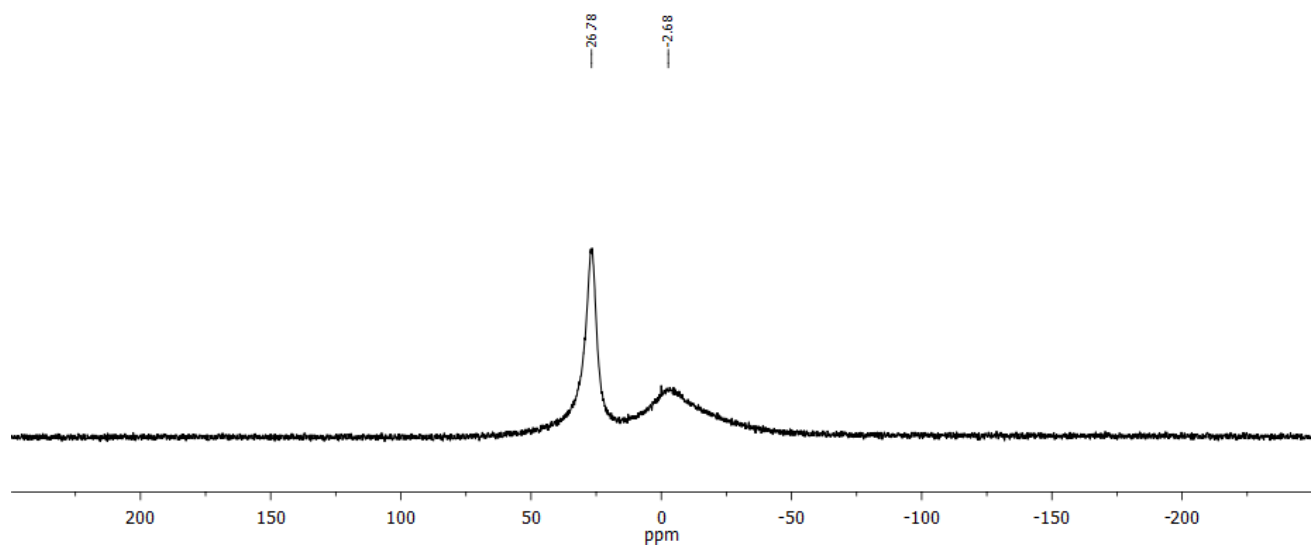

**Figure S17.**  $^{11}\text{B}\{^1\text{H}\}$  NMR (128 MHz,  $\text{CD}_2\text{Cl}_2$ ) of **4o**. Signal at  $\delta$  -2.68 ppm is related to the NMR tube glass.

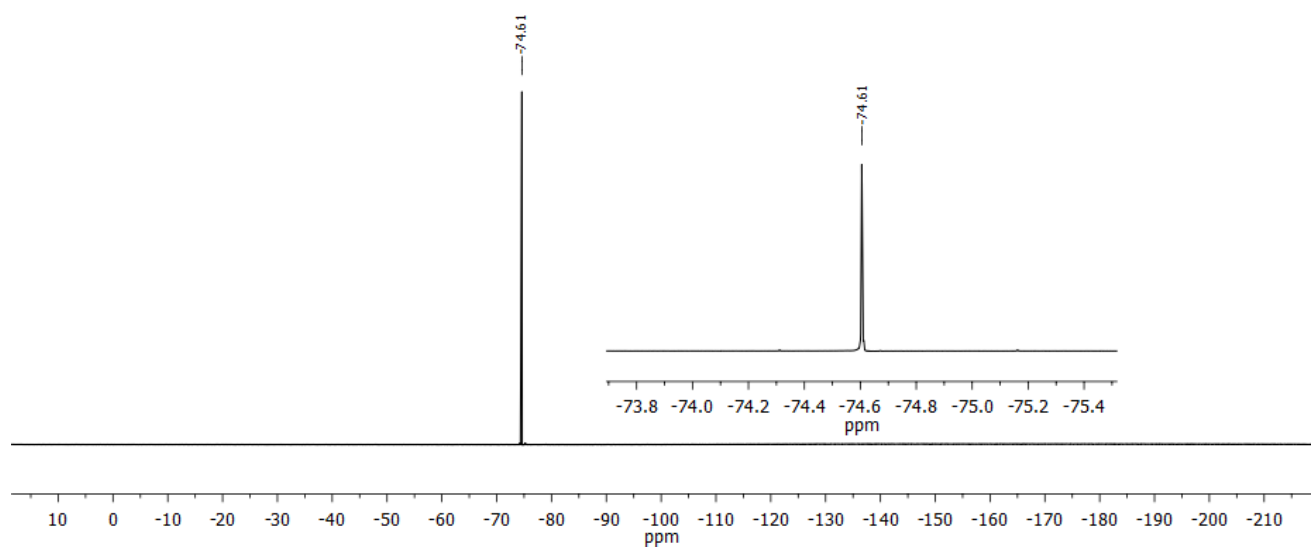

**Figure S18.**  $^{19}\text{F}\{^1\text{H}\}$  NMR (376 MHz,  $\text{CD}_2\text{Cl}_2$ ) of **4o**.

**Acquisition Parameter**

|             |            |                      |          |                  |           |
|-------------|------------|----------------------|----------|------------------|-----------|
| Source Type | ESI        | Ion Polarity         | Positive | Set Nebulizer    | 1.2 Bar   |
| Focus       | Not active | Set Capillary        | 4500 V   | Set Dry Heater   | 200 °C    |
| Scan Begin  | 80 m/z     | Set End Plate Offset | -500 V   | Set Dry Gas      | 6.0 l/min |
| Scan End    | 1000 m/z   | Set Charging Voltage | 0 V      | Set Divert Valve | Waste     |
|             |            | Set Corona           | 0 nA     | Set APCI Heater  | 0 °C      |

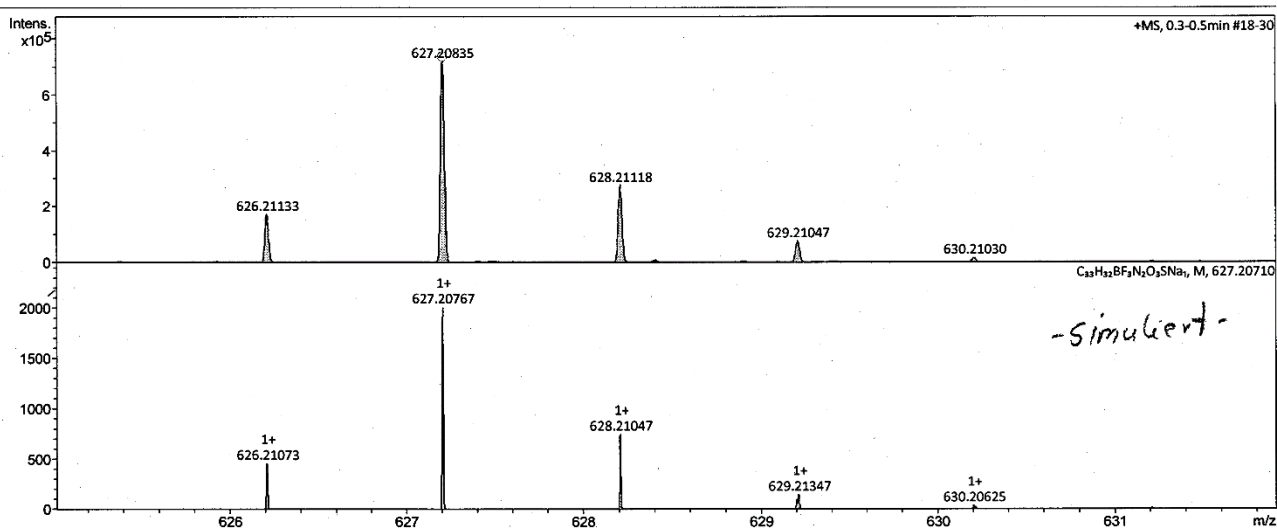

**Figure S19.** Experimental HR ESI-MS of **4o** (top) and theoretical isotopic envelope for  $C_{33}H_{32}BF_3N_2O_3SNa [M+Na]^+$  (bottom).

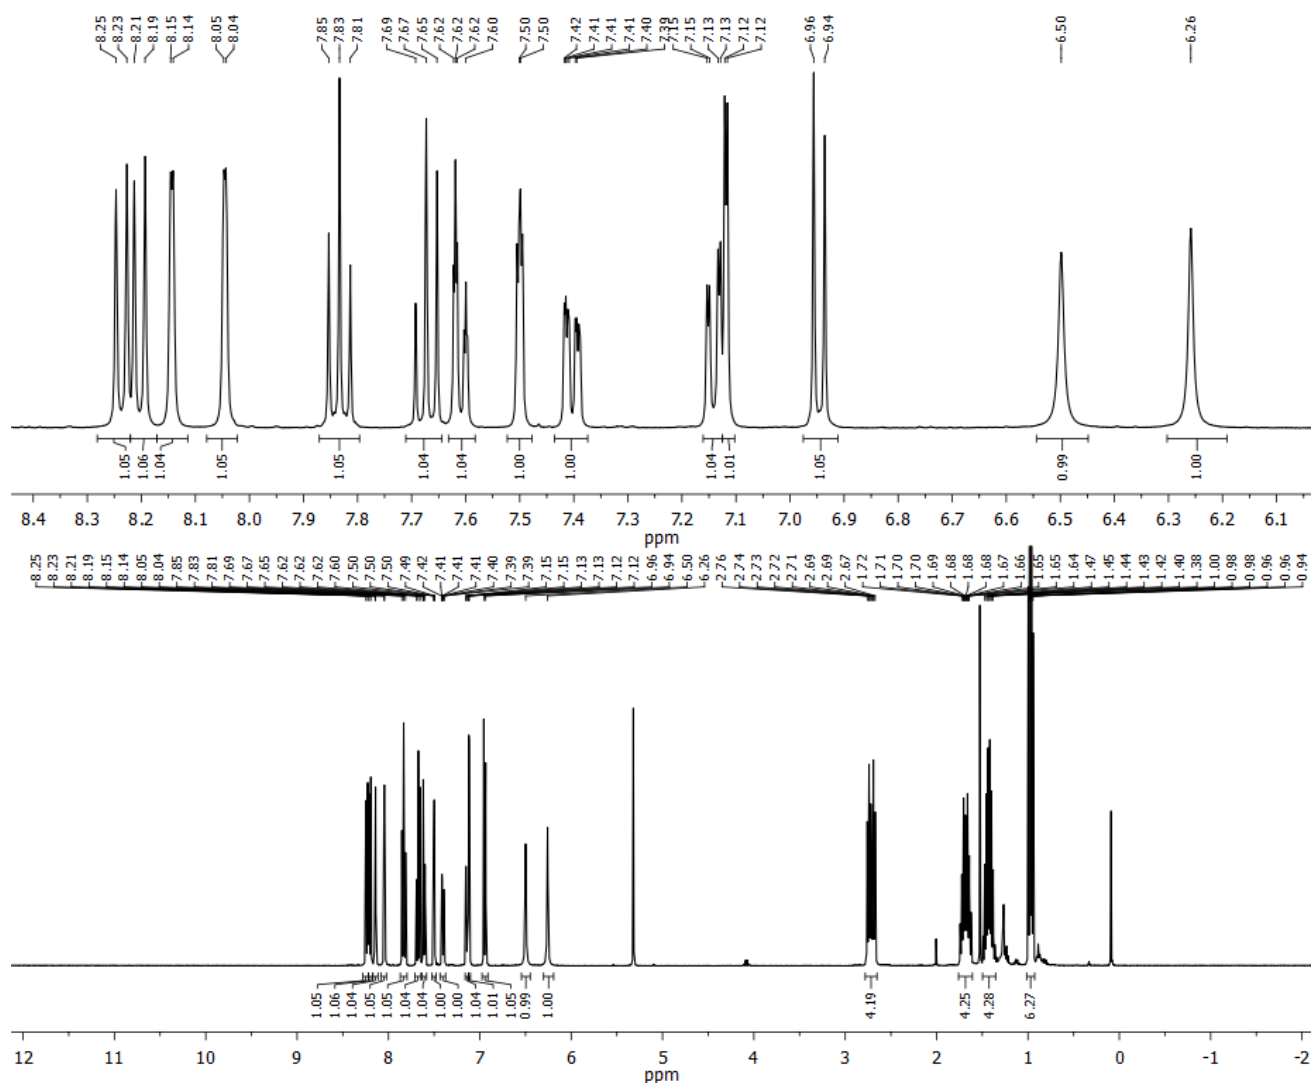

**Figure S20.** <sup>1</sup>H NMR (400 MHz, CD<sub>2</sub>Cl<sub>2</sub>) of **4m**.

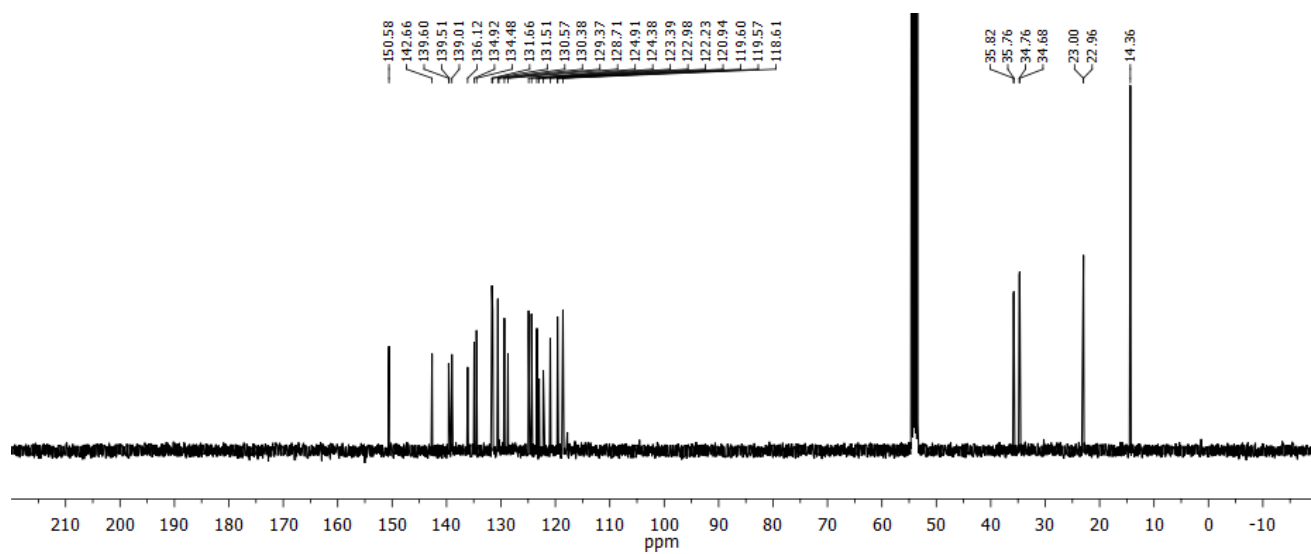

**Figure S21.**  $^{13}\text{C}\{^1\text{H}\}$  NMR (101 MHz,  $\text{CD}_2\text{Cl}_2$ ) of **4m**.

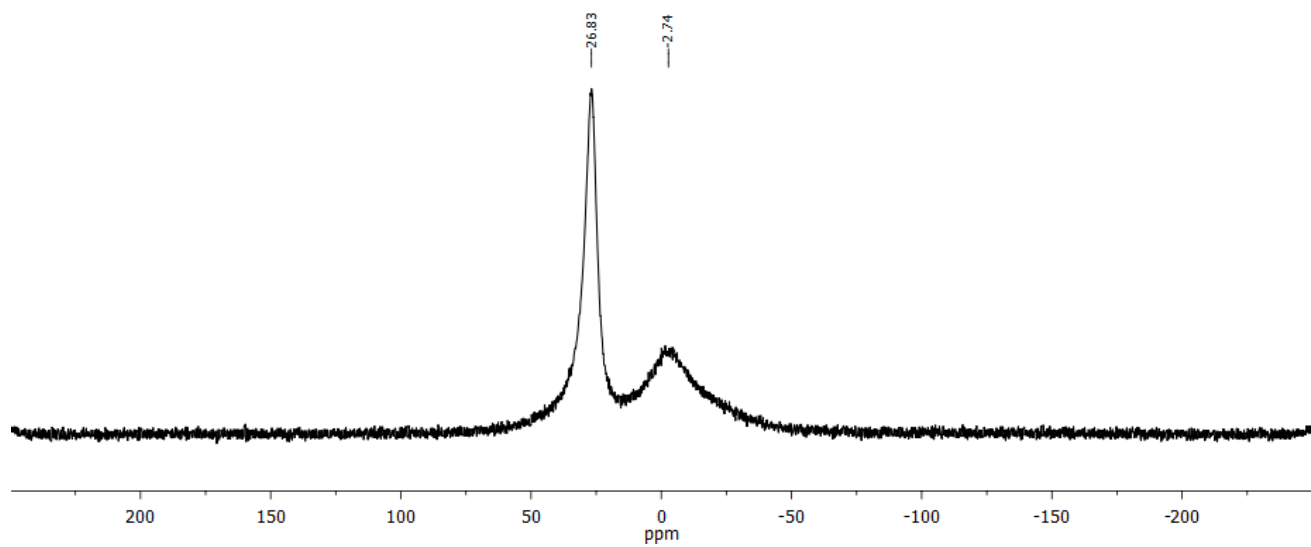

**Figure S22.**  $^{11}\text{B}\{^1\text{H}\}$  NMR (128 MHz,  $\text{CD}_2\text{Cl}_2$ ) of **4m**. Signal at  $\delta$  -2.74 ppm is related to the NMR tube glass.



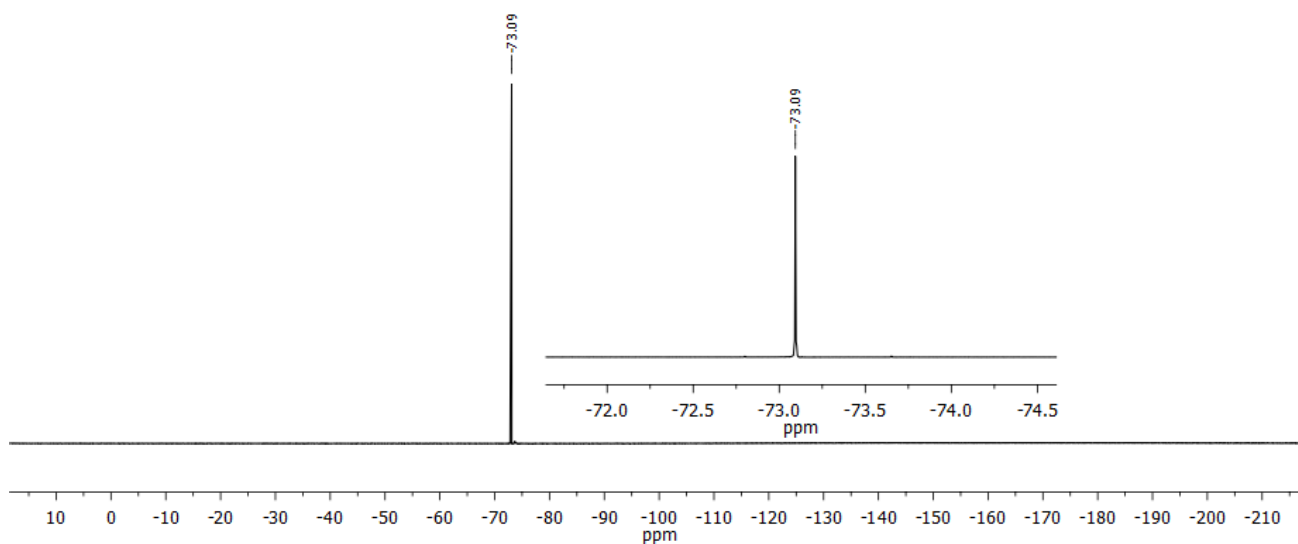

**Figure S23.**  $^{19}\text{F}\{^1\text{H}\}$  NMR (376 MHz,  $\text{CD}_2\text{Cl}_2$ ) of **4m**.

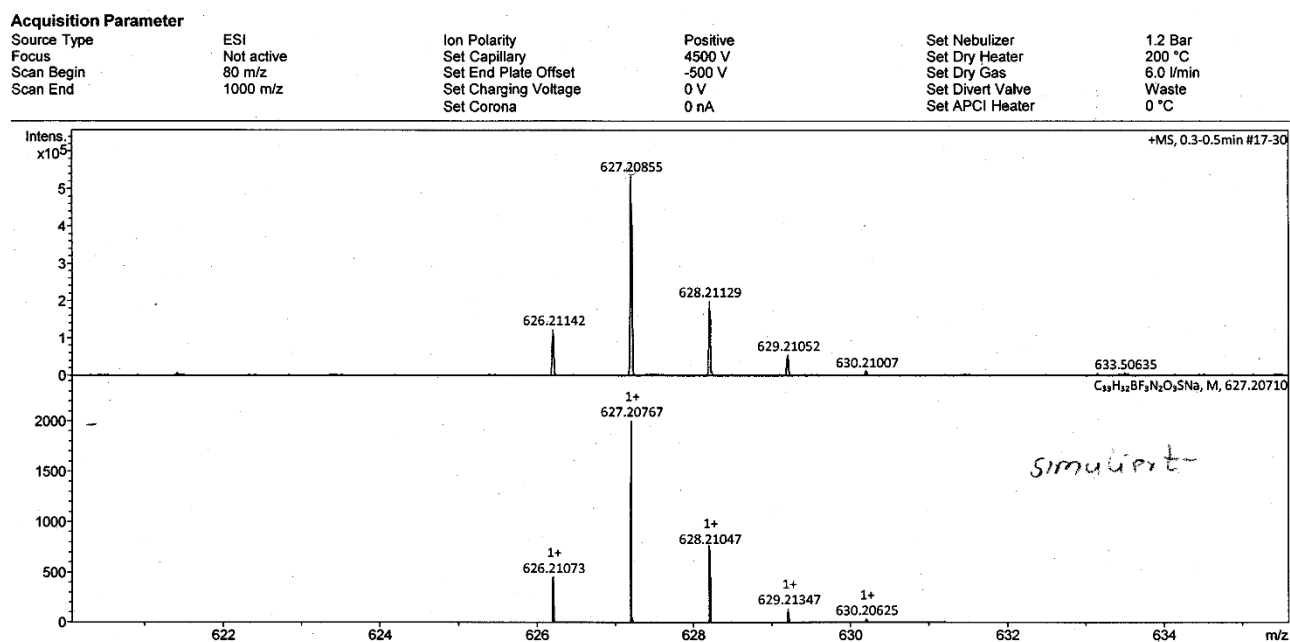

**Figure S24.** Experimental HR ESI-MS of **4m** (top) and theoretical isotopic envelope for  $\text{C}_{33}\text{H}_{32}\text{BF}_3\text{N}_2\text{O}_3\text{SNa}$   $[\text{M}+\text{Na}]^+$  (bottom).

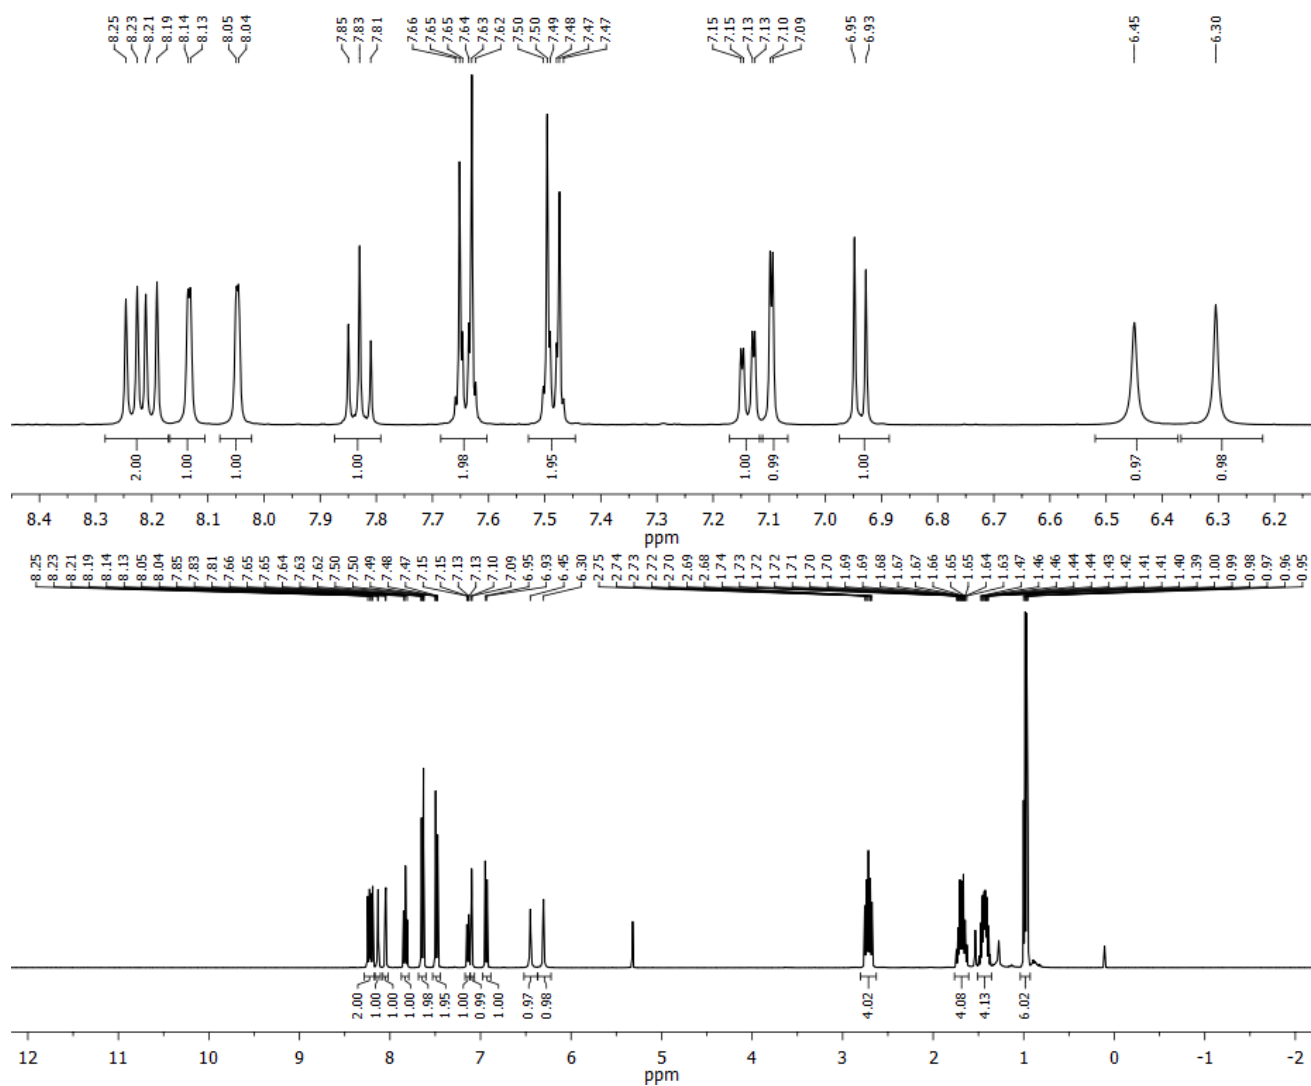

Figure S25.  $^1\text{H}$  NMR (400 MHz,  $\text{CD}_2\text{Cl}_2$ ) of **4p**.

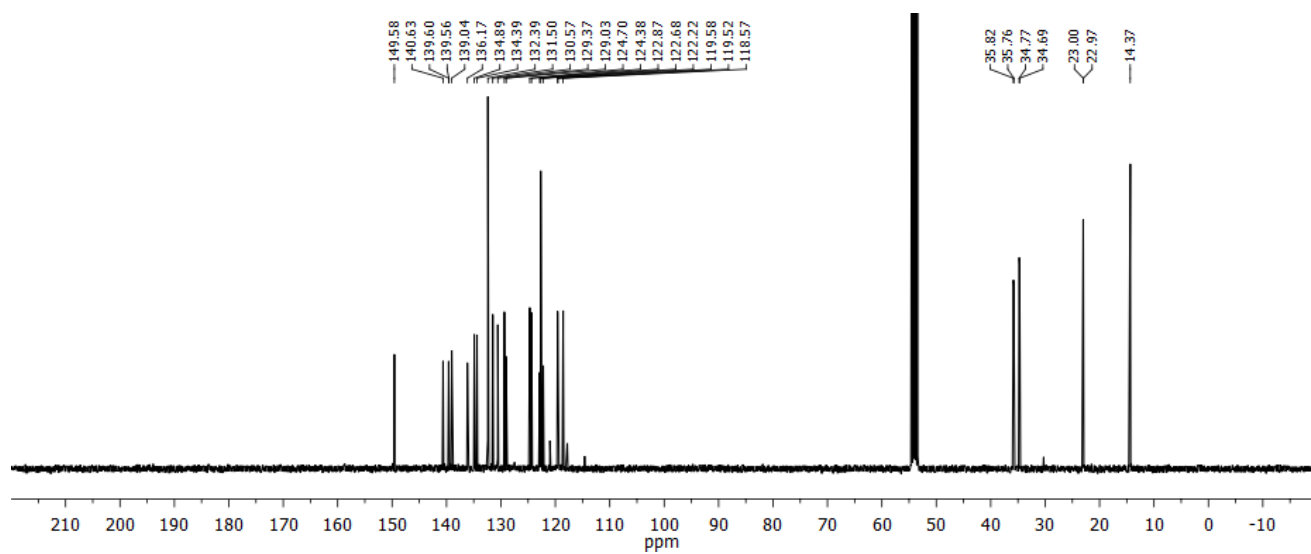

Figure S26.  $^{13}\text{C}\{^1\text{H}\}$  NMR (101 MHz,  $\text{CD}_2\text{Cl}_2$ ) of **4p**.

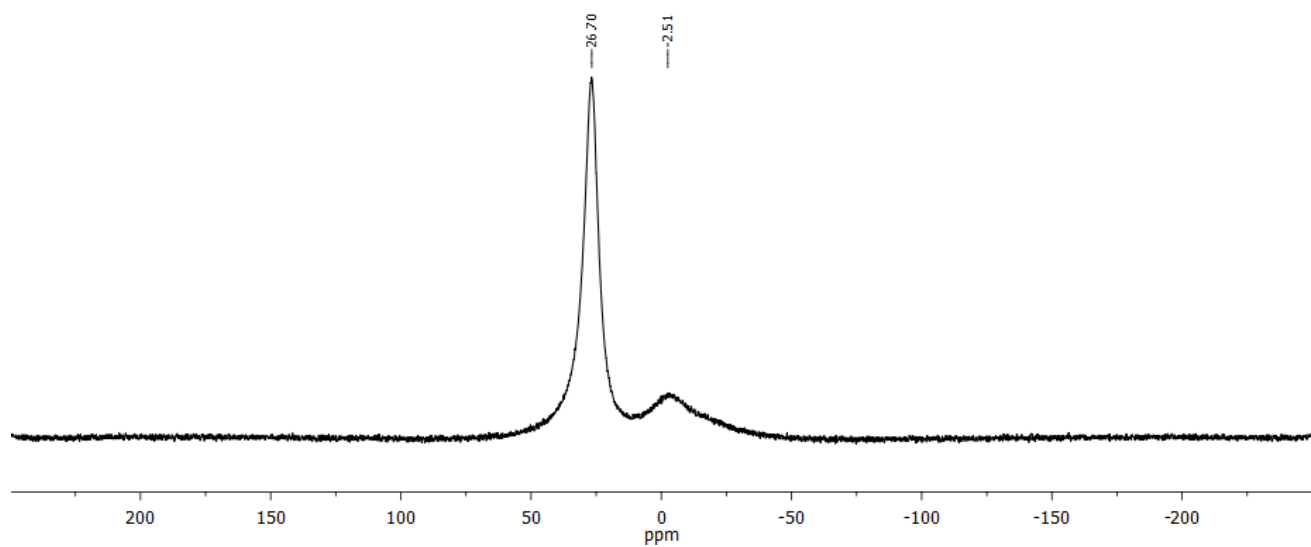

**Figure S27.**  $^{11}\text{B}\{^1\text{H}\}$  NMR (128 MHz,  $\text{CD}_2\text{Cl}_2$ ) of **4p**. Signal at  $\delta$  -2.51 ppm is related to the NMR tube glass.

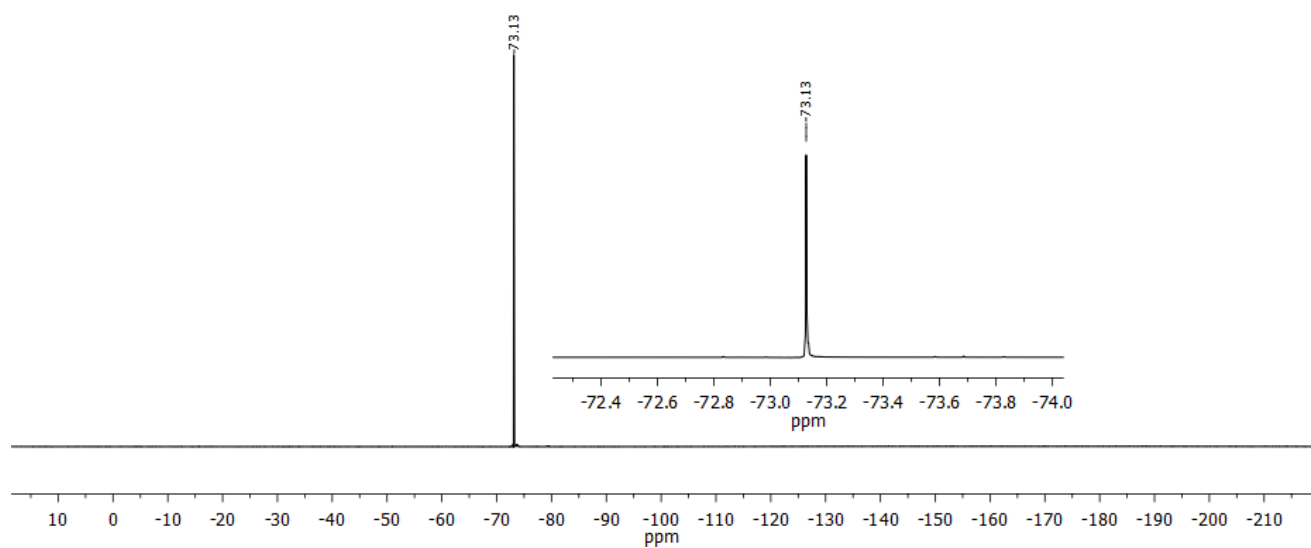

**Figure S28.**  $^{19}\text{F}\{^1\text{H}\}$  NMR (376 MHz,  $\text{CD}_2\text{Cl}_2$ ) of **4p**.

**Acquisition Parameter**

|             |            |                      |          |                  |           |
|-------------|------------|----------------------|----------|------------------|-----------|
| Source Type | ESI        | Ion Polarity         | Positive | Set Nebulizer    | 1.2 Bar   |
| Focus       | Not active | Set Capillary        | 4500 V   | Set Dry Heater   | 200 °C    |
| Scan Begin  | 80 m/z     | Set End Plate Offset | -500 V   | Set Dry Gas      | 6.0 l/min |
| Scan End    | 1000 m/z   | Set Charging Voltage | 0 V      | Set Divert Valve | 0 °C      |
|             |            | Set Corona           | 0 nA     | Set APCI Heater  |           |

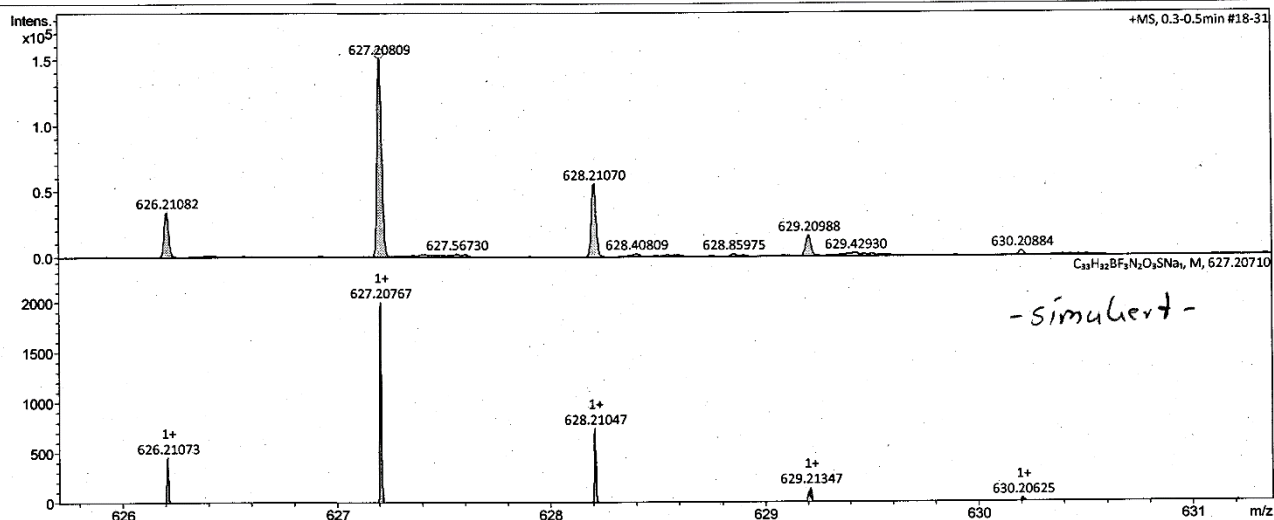

**Figure S29.** Experimental HR ESI-MS of **4p** (top) and theoretical isotopic envelope for  $C_{33}H_{32}BF_3N_2O_3SNa [M+Na]^+$  (bottom).

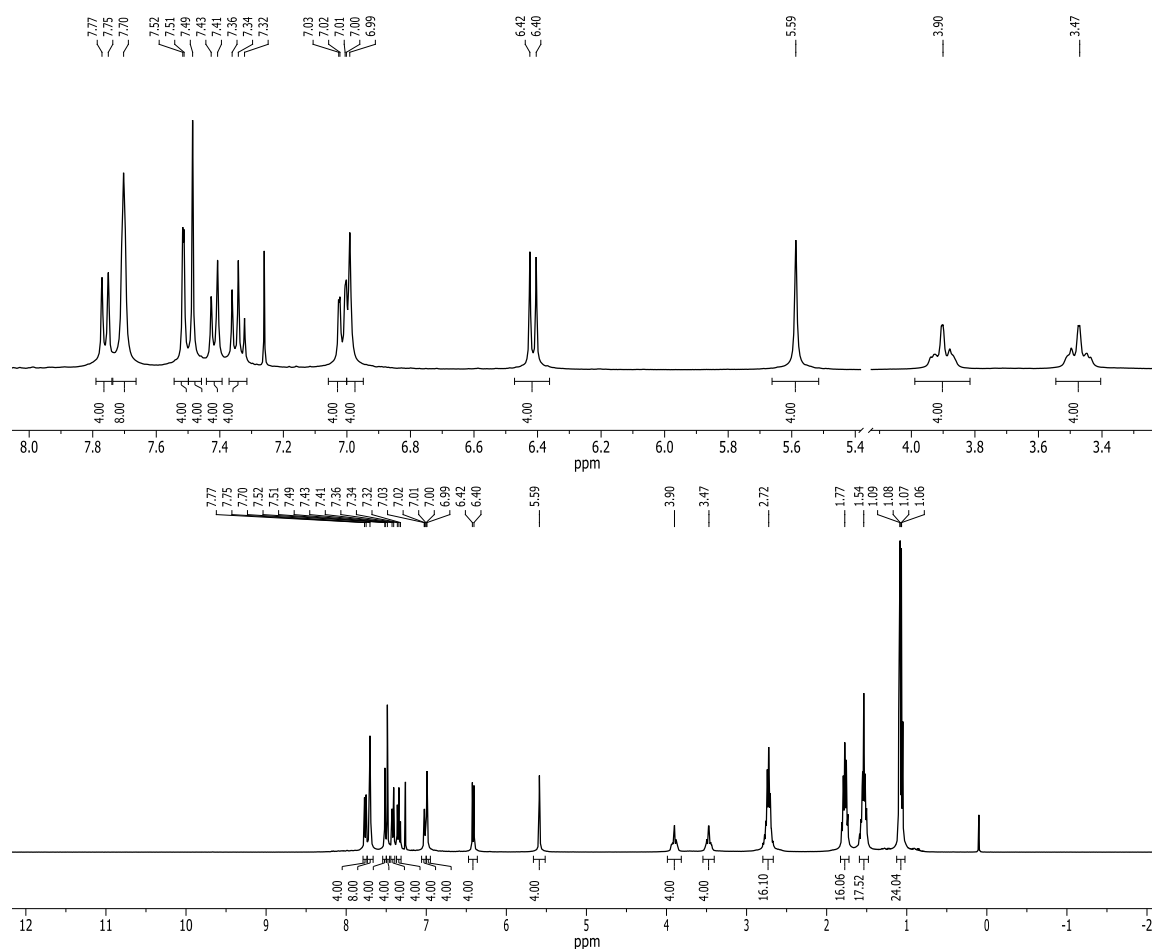

**Figure S30.**  $^1H$  NMR (400 MHz,  $CDCl_3$ ) of rac-**6**.

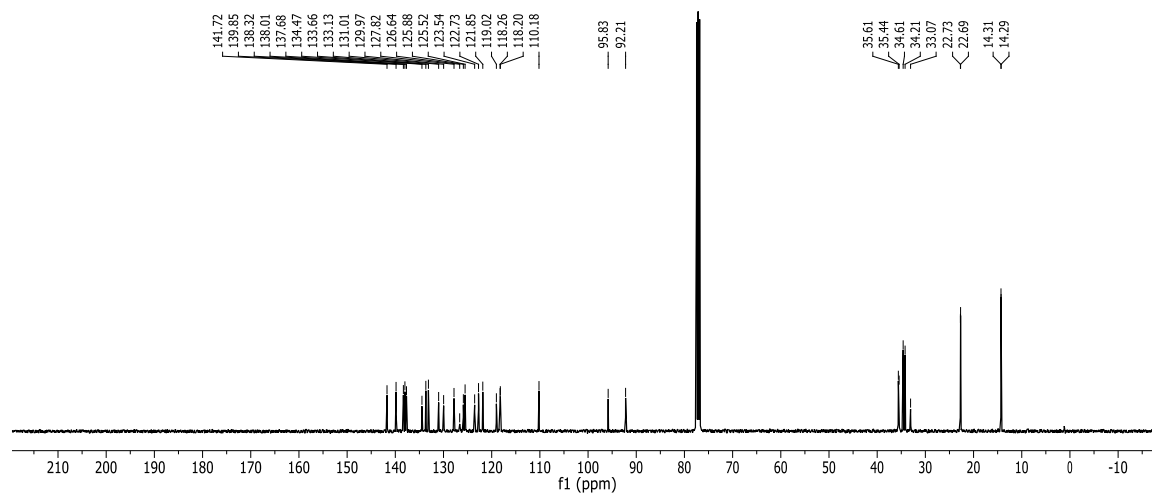

**Figure S31.**  $^{13}\text{C}\{^1\text{H}\}$  NMR (101 MHz,  $\text{CDCl}_3$ ) of rac-**6**.

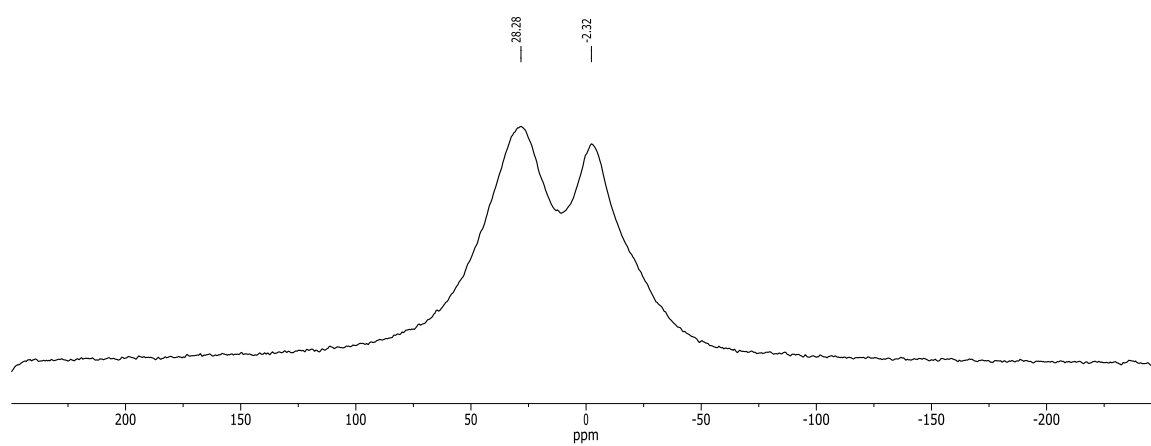

**Figure S32.**  $^{11}\text{B}\{^1\text{H}\}$  NMR (128 MHz,  $\text{CDCl}_3$ ) of rac-**6**. Signal at  $\delta$  -2.32 ppm is related to the NMR tube glass.

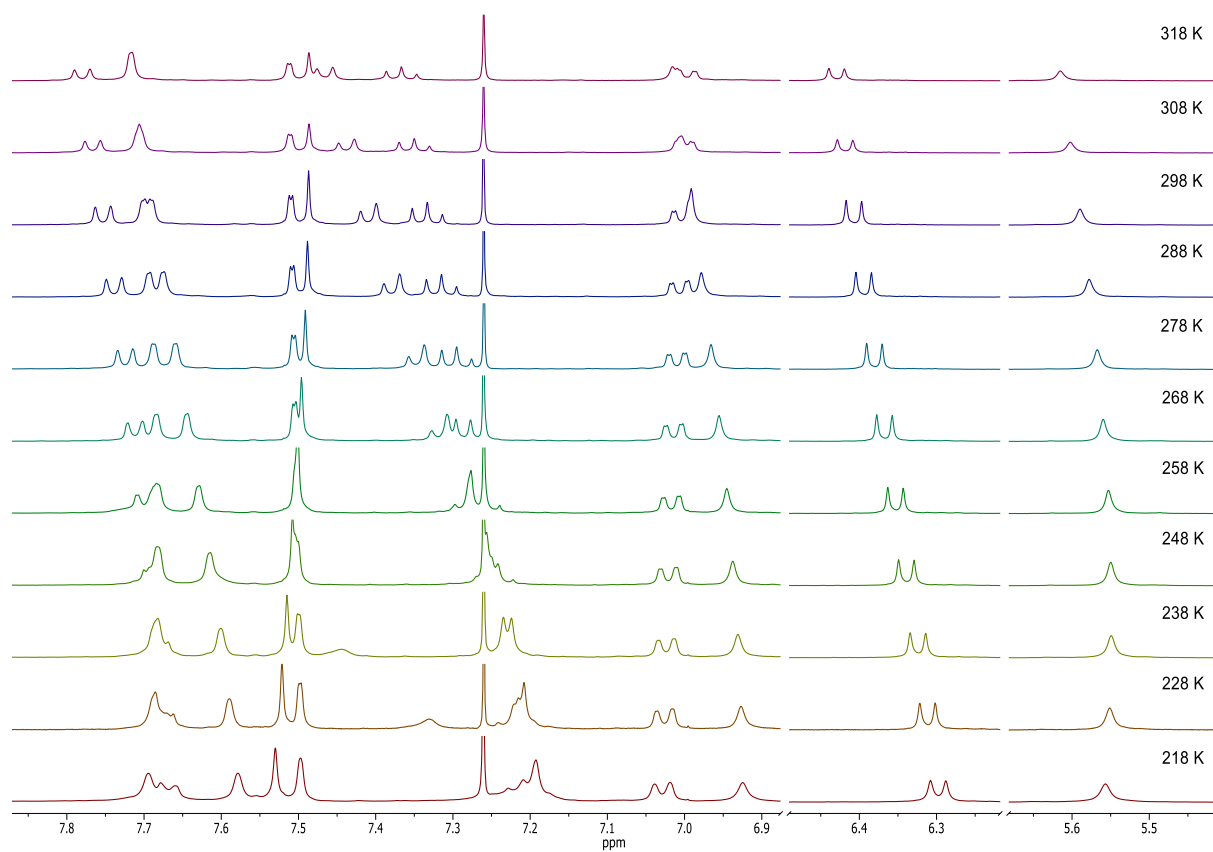

**Figure S33.** Variable temperature <sup>1</sup>H NMR (400 MHz, CDCl<sub>3</sub>) of rac-6 measured at T = -55 – 45 °C.

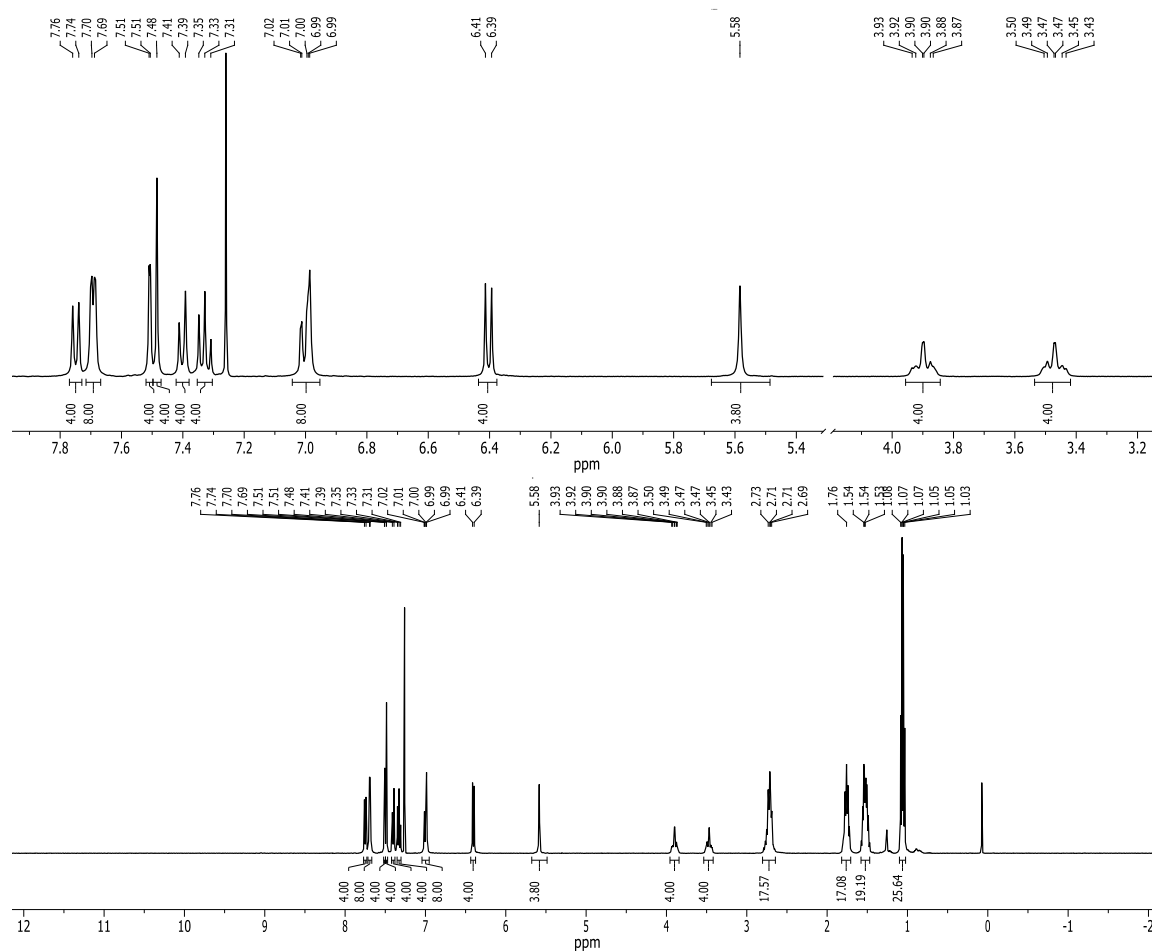

**Figure S34.**  $^1\text{H}$  NMR (400 MHz,  $\text{CDCl}_3$ ) of (R)-6.



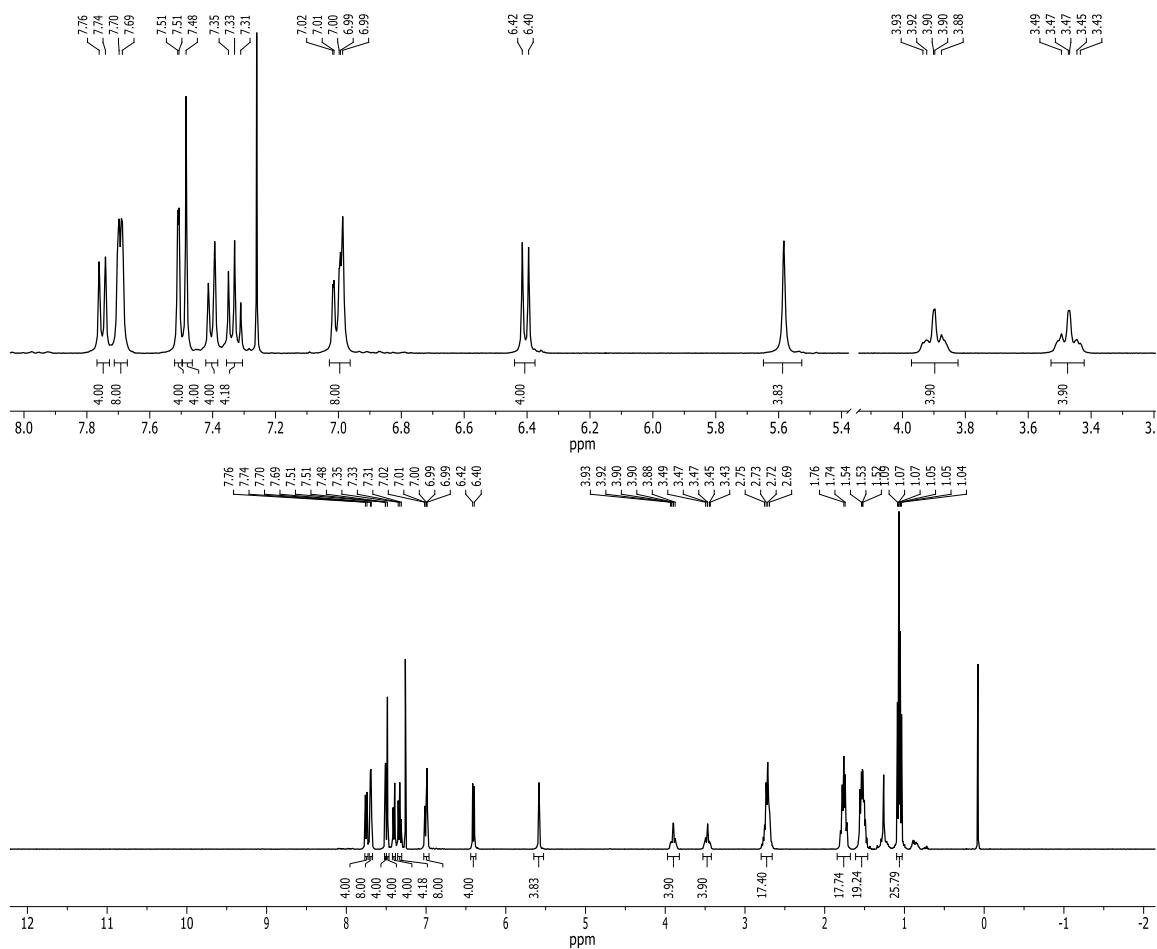

Figure S35.  $^1\text{H}$  NMR (400 MHz,  $\text{CDCl}_3$ ) of (S)-6.

Acquisition Parameter

|             |          |                      |          |                  |           |
|-------------|----------|----------------------|----------|------------------|-----------|
| Source Type | ESI      | Ion Polarity         | Positive | Set Nebulizer    | 1.2 Bar   |
| Focus       | Active   | Set Capillary        | 4500 V   | Set Dry Heater   | 300 °C    |
| Scan Begin  | 600 m/z  | Set End Plate Offset | -500 V   | Set Dry Gas      | 6.0 l/min |
| Scan End    | 2800 m/z | Set Charging Voltage | 0 V      | Set Divert Valve | Waste     |
|             |          | Set Corona           | 0 nA     | Set APCI Heater  | 0 °C      |

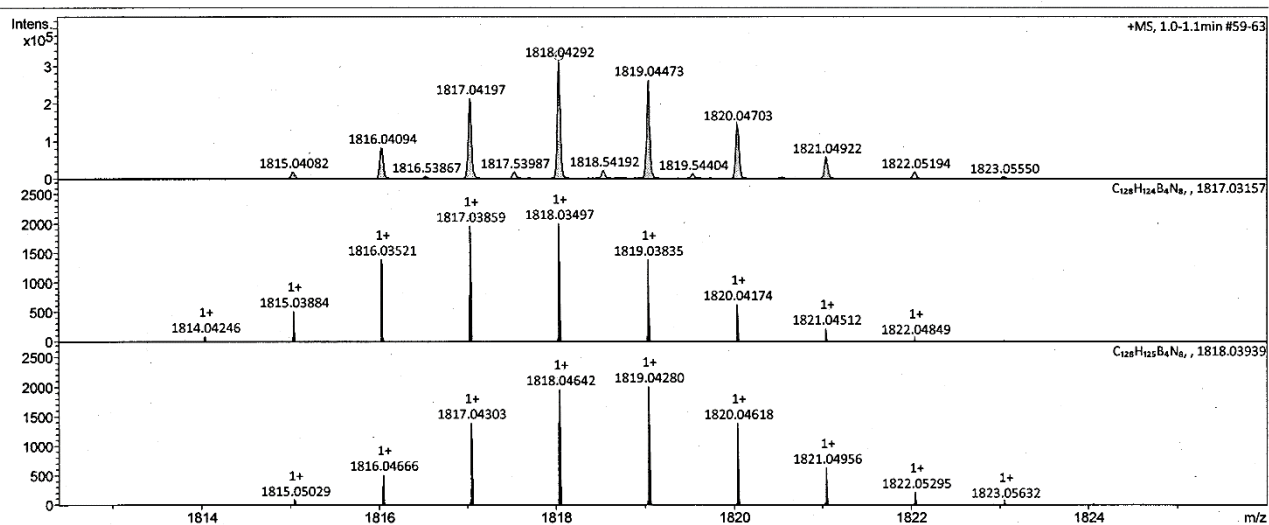

Figure S36. Experimental HR ESI-MS of rac-6 (top) and theoretical isotopic envelope for  $\text{C}_{128}\text{H}_{124}\text{B}_4\text{N}_8$  [ $\text{M}$ ] $^+$  and  $\text{C}_{128}\text{H}_{125}\text{B}_4\text{N}_8$  [ $\text{M}+\text{H}$ ] $^+$  (middle and bottom, respectively).

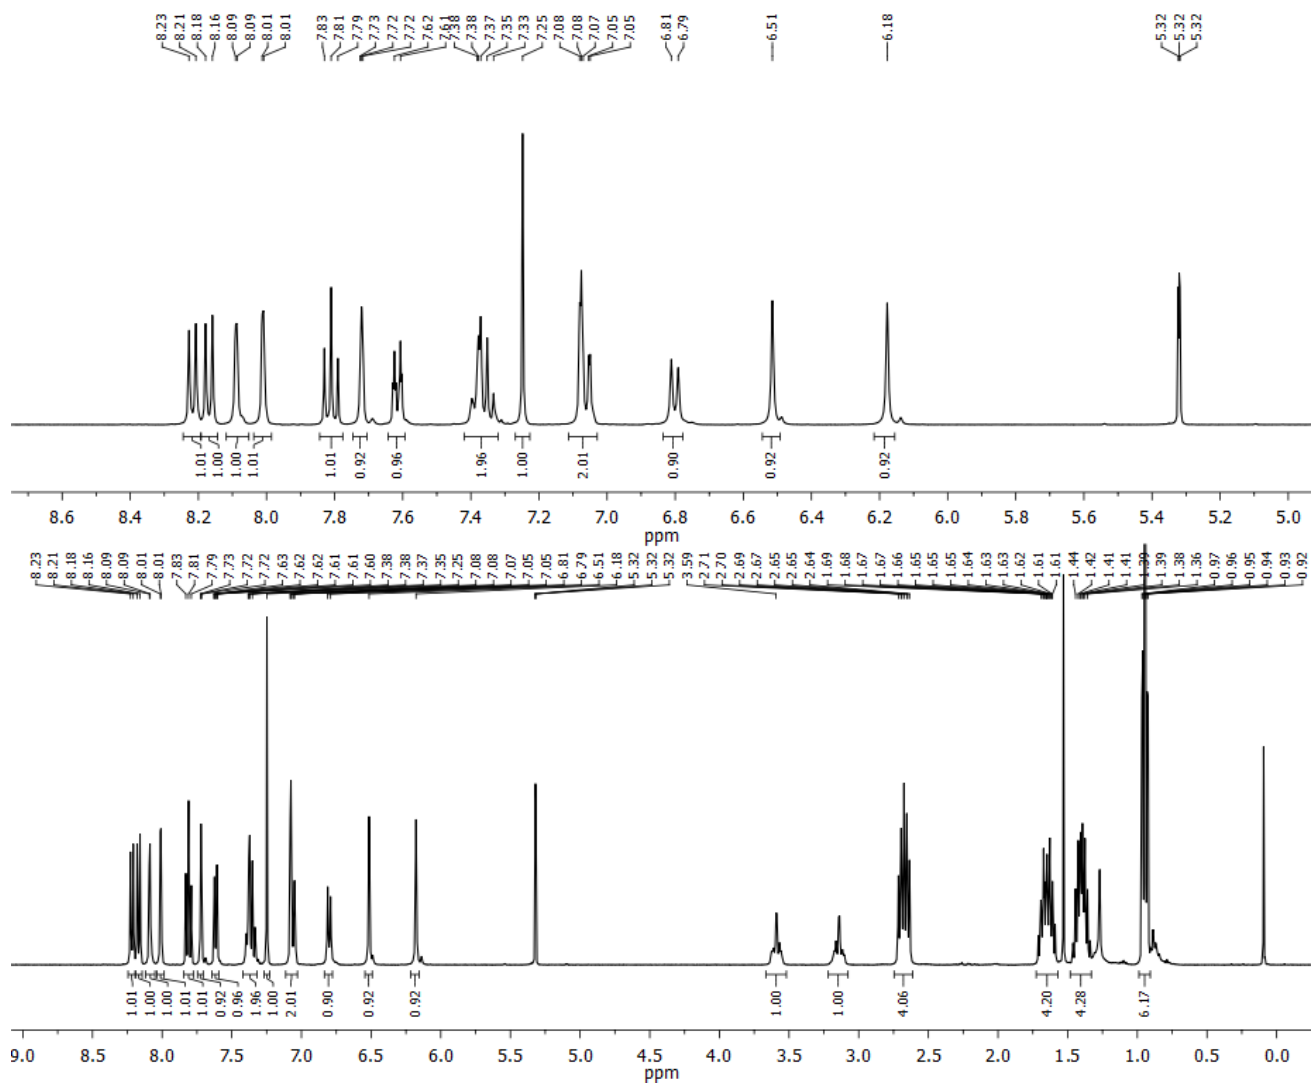

Figure S37.  $^1\text{H}$  NMR (400 MHz,  $\text{CD}_2\text{Cl}_2$ ) of *rac*-**7m**.

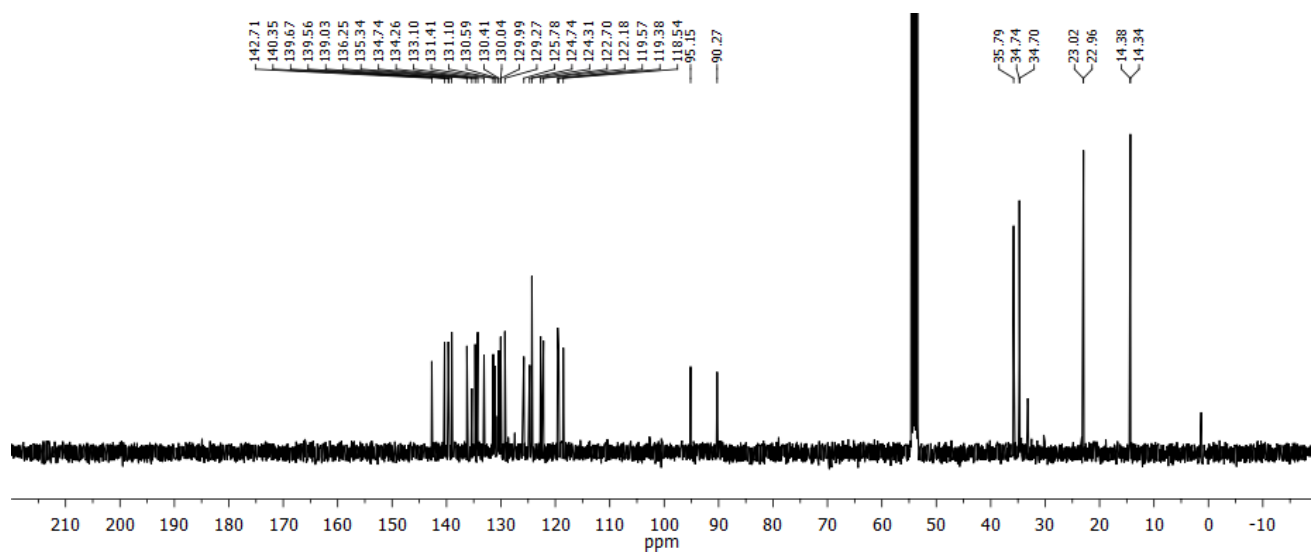

Figure S38.  $^{13}\text{C}\{^1\text{H}\}$  NMR (101 MHz,  $\text{CD}_2\text{Cl}_2$ ) of *rac*-**7m**.

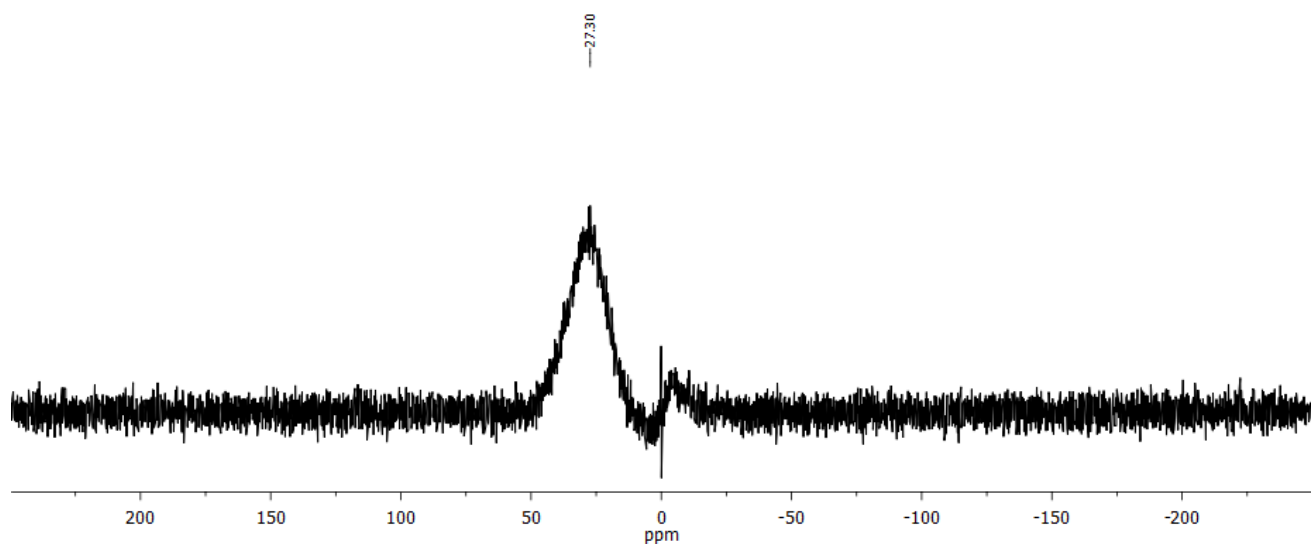

Figure S39.  $^{11}\text{B}\{^1\text{H}\}$  NMR (128 MHz,  $\text{CDCl}_3$ ) of *rac*-**7m**.

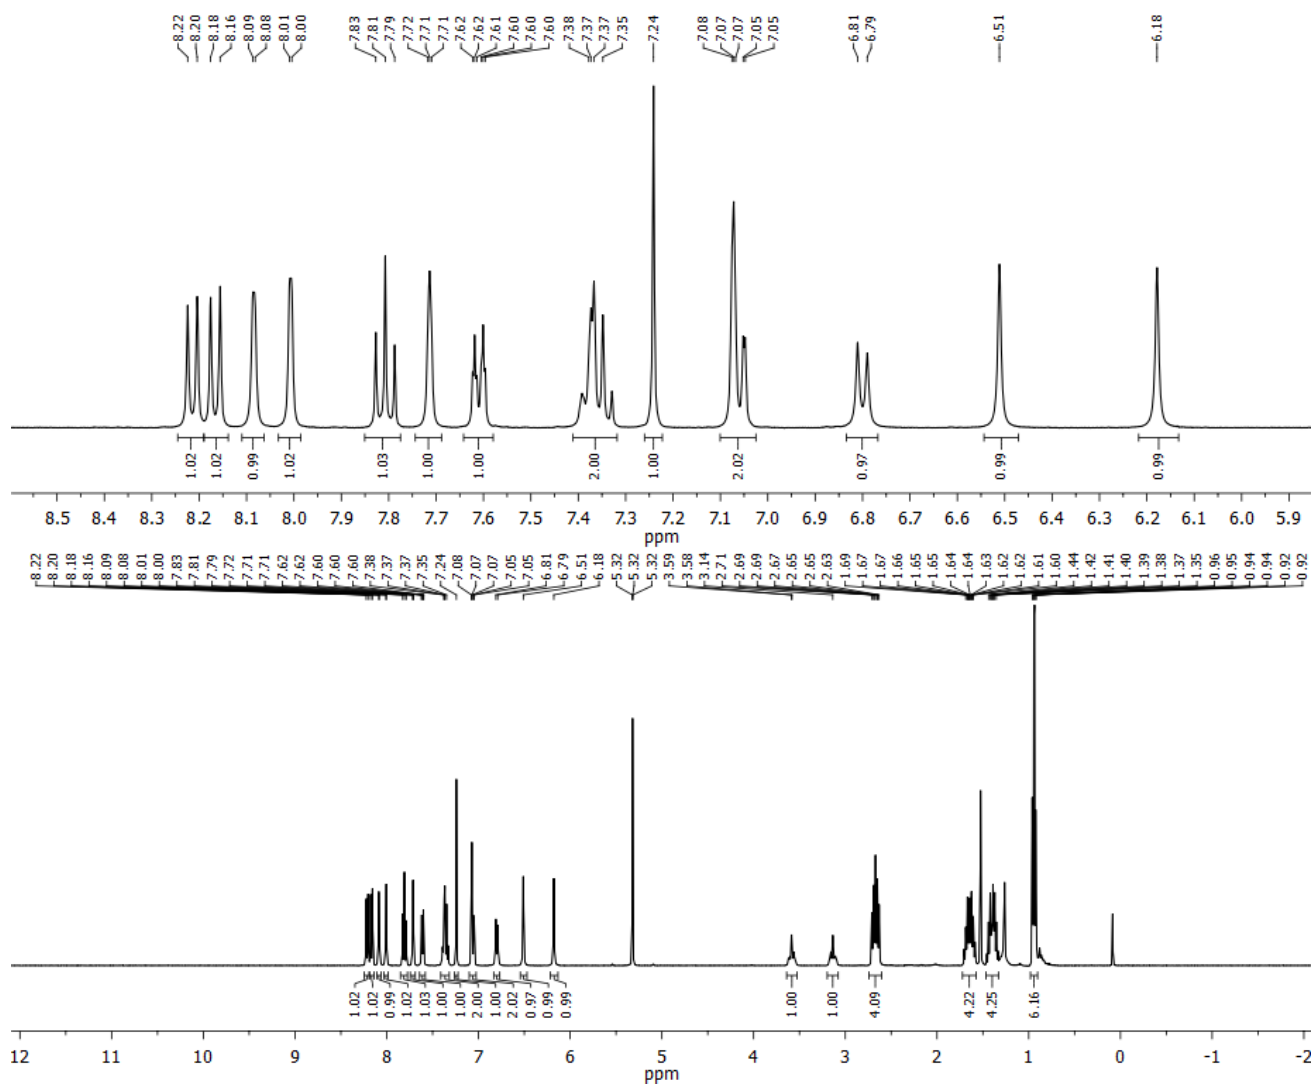

Figure S40.  $^1\text{H}$  NMR (400 MHz,  $\text{CD}_2\text{Cl}_2$ ) of (*R*)-**7m**.

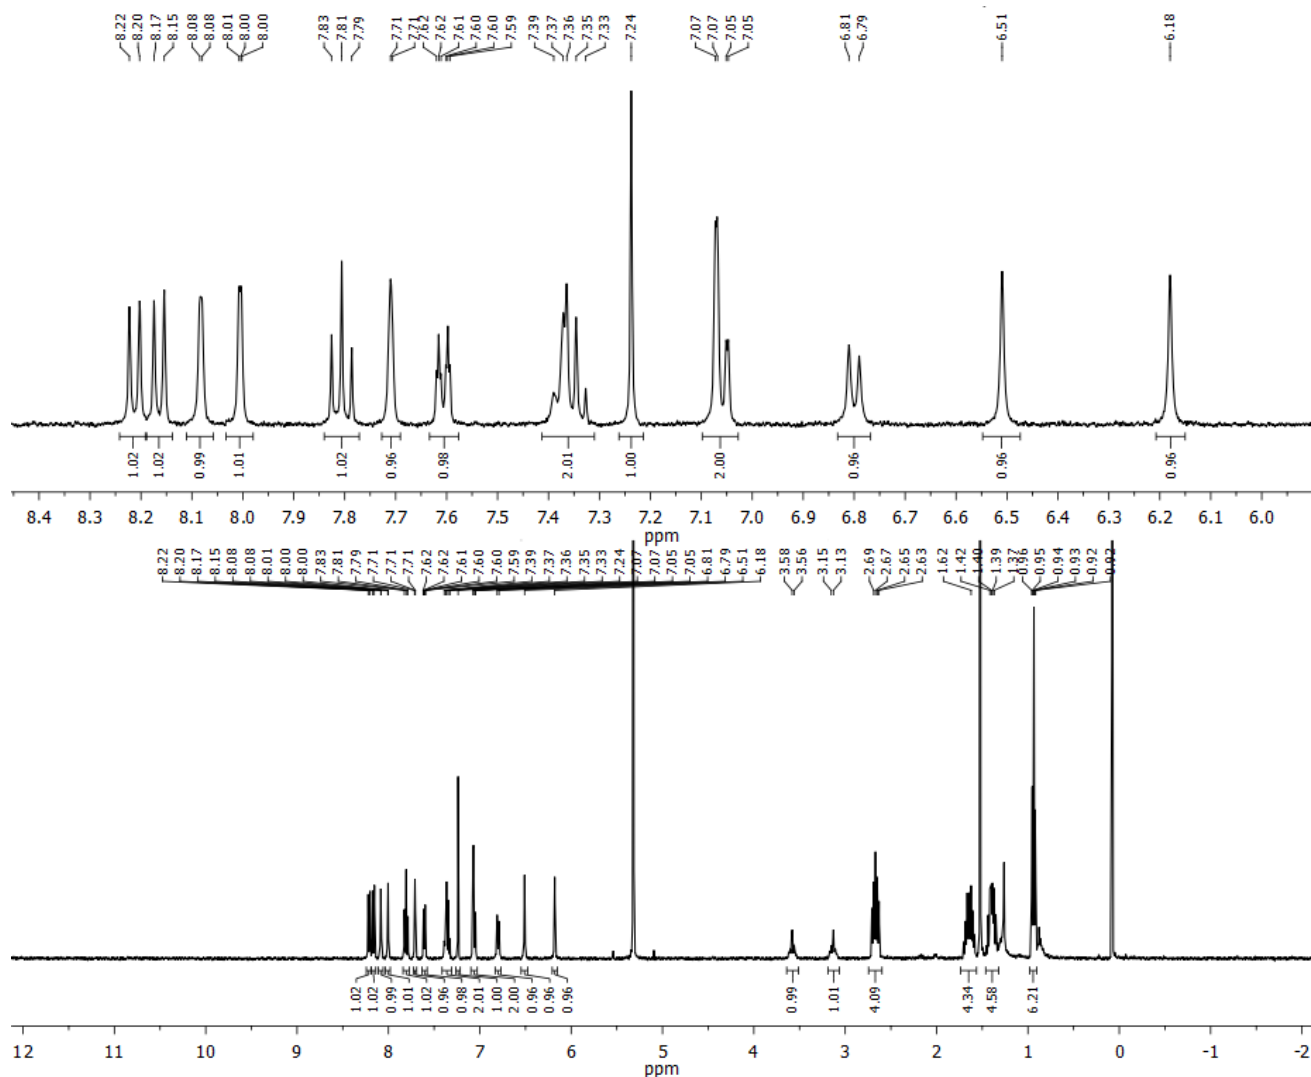

Figure S41.  $^1\text{H}$  NMR (400 MHz,  $\text{CD}_2\text{Cl}_2$ ) of (S)-7m.

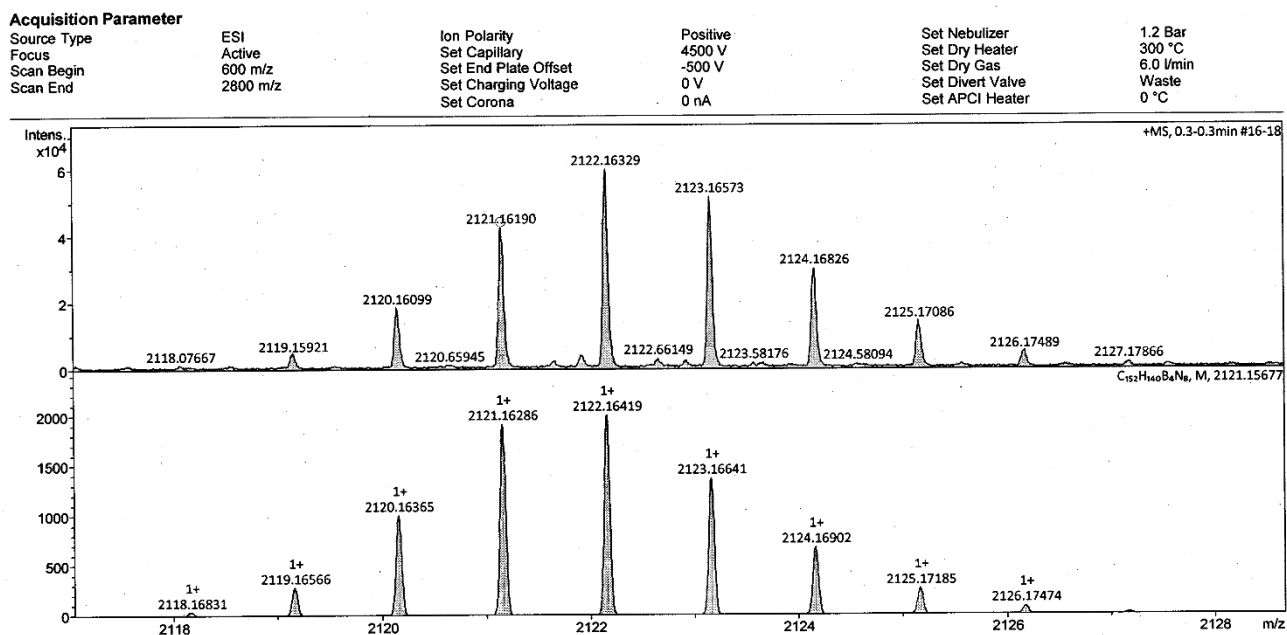

Figure S42. Experimental HR ESI-MS of rac-7m (top) and theoretical isotopic envelope for  $\text{C}_{152}\text{H}_{140}\text{B}_4\text{N}_8$   $[\text{M}]^+$  (bottom).

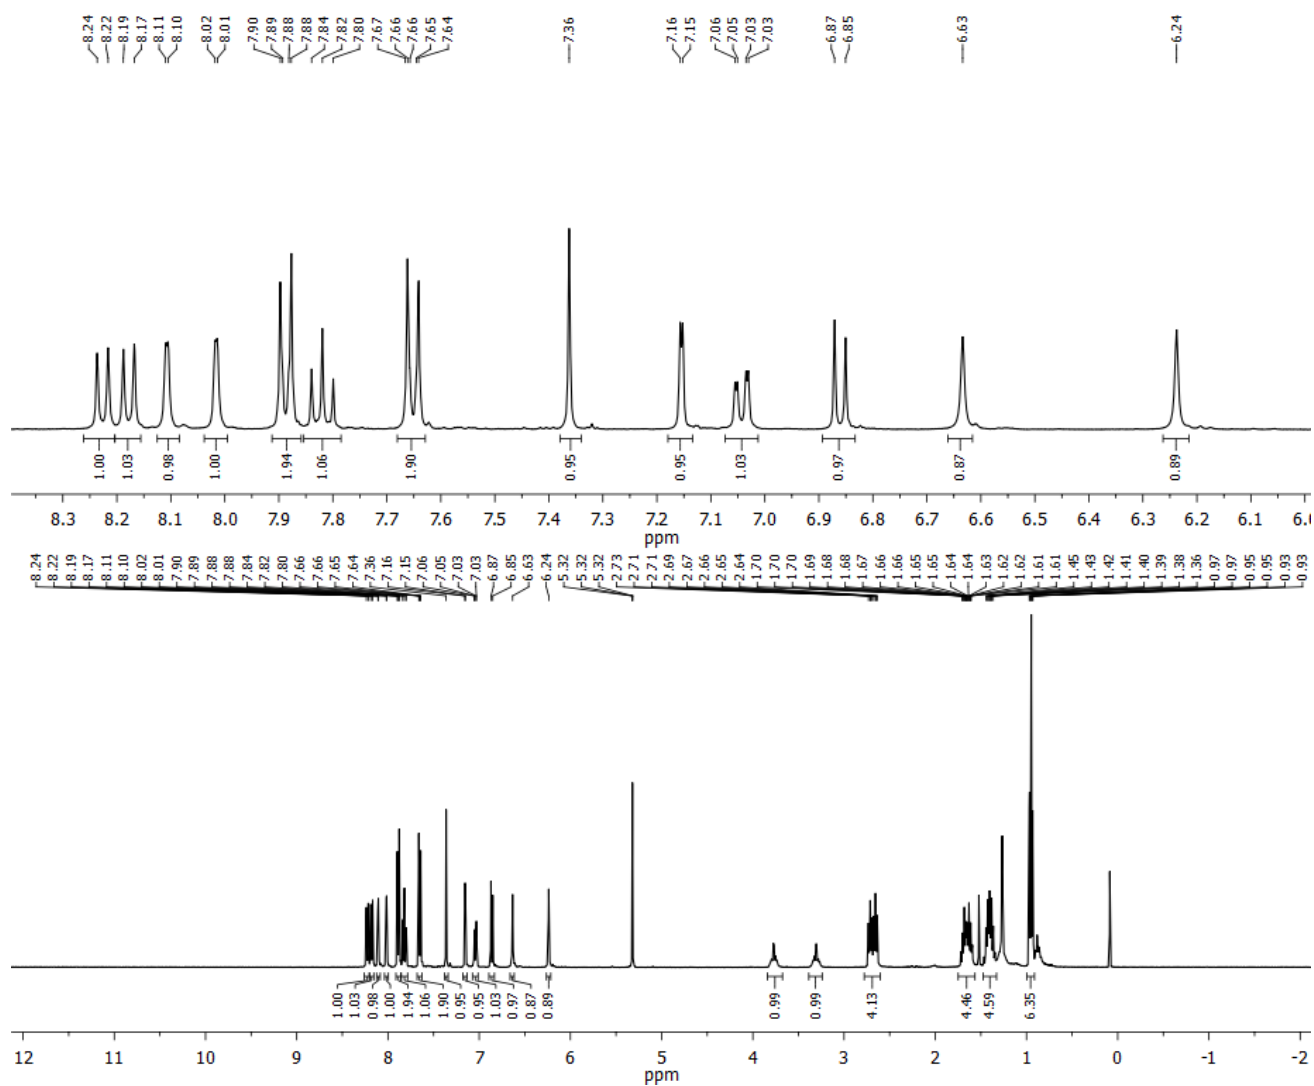

Figure S43.  $^1\text{H}$  NMR (400 MHz,  $\text{CD}_2\text{Cl}_2$ ) of *rac*-**7p**.

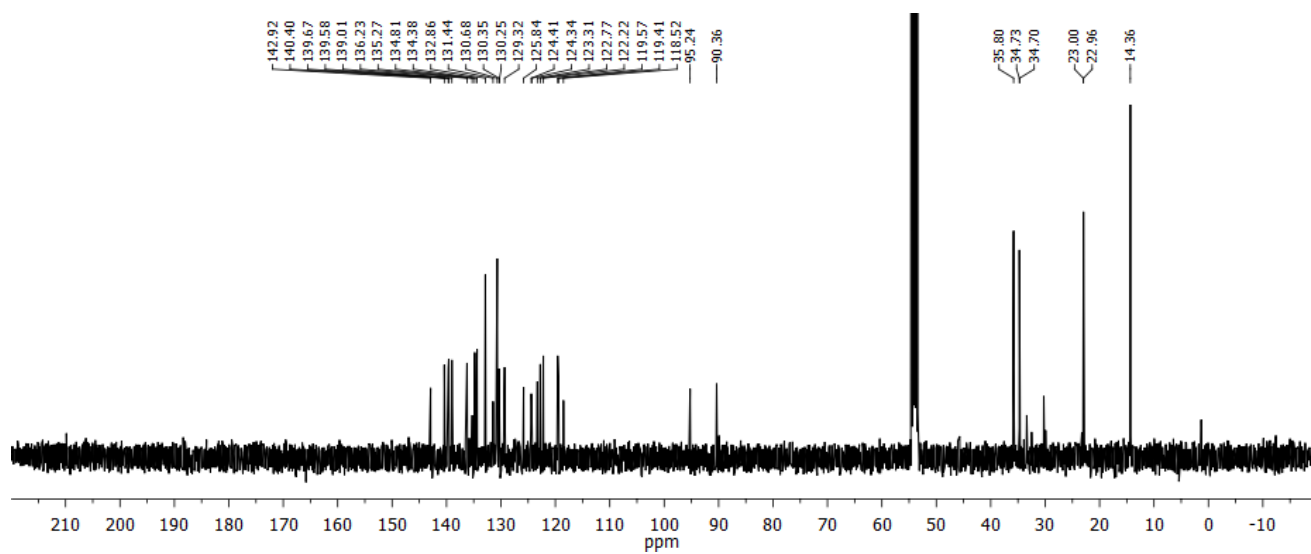

Figure S44.  $^{13}\text{C}\{^1\text{H}\}$  NMR (400 MHz,  $\text{CD}_2\text{Cl}_2$ ) of *rac*-**7p**.

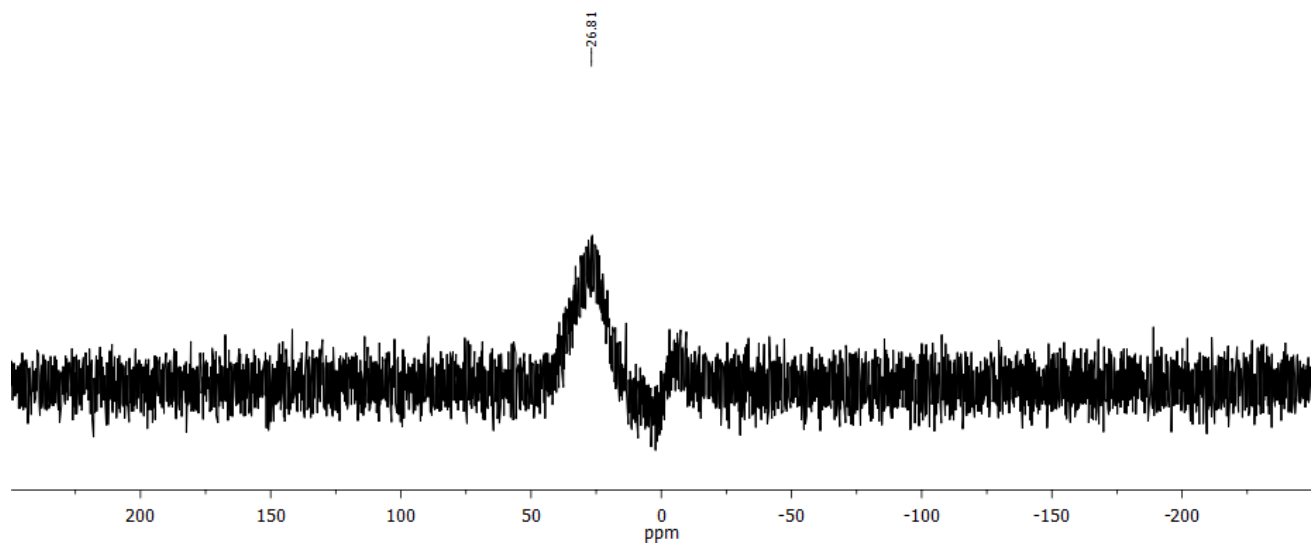

Figure S45.  $^{11}\text{B}\{^1\text{H}\}$  NMR (128 MHz,  $\text{CDCl}_3$ ) of *rac*-**7p**.

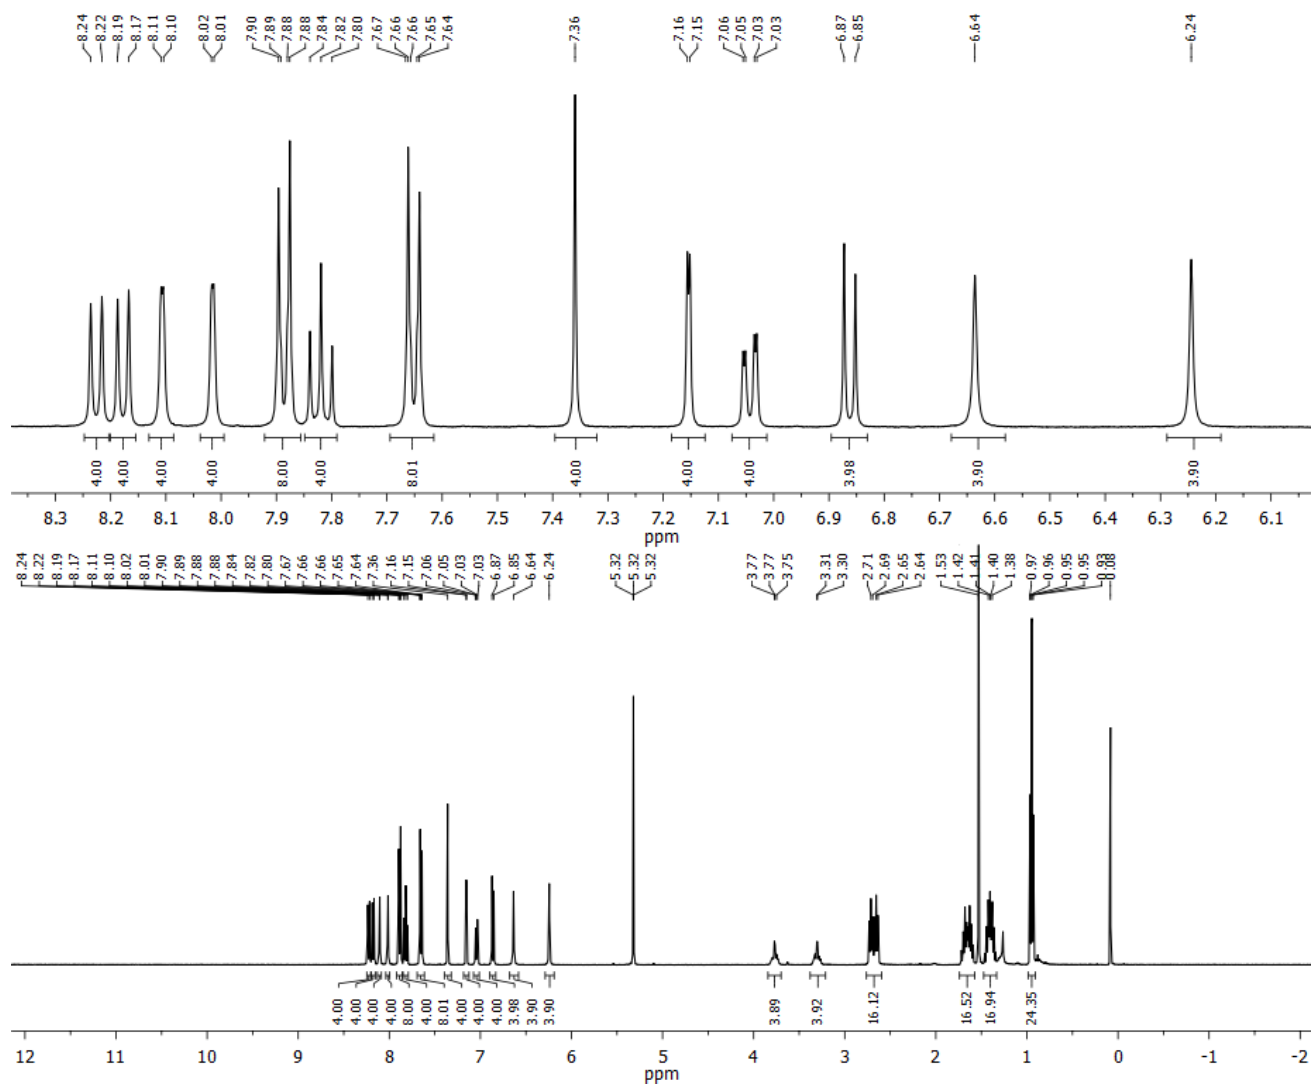

Figure S46.  $^1\text{H}$  NMR (400 MHz,  $\text{CD}_2\text{Cl}_2$ ) of (*R*)-**7p**.

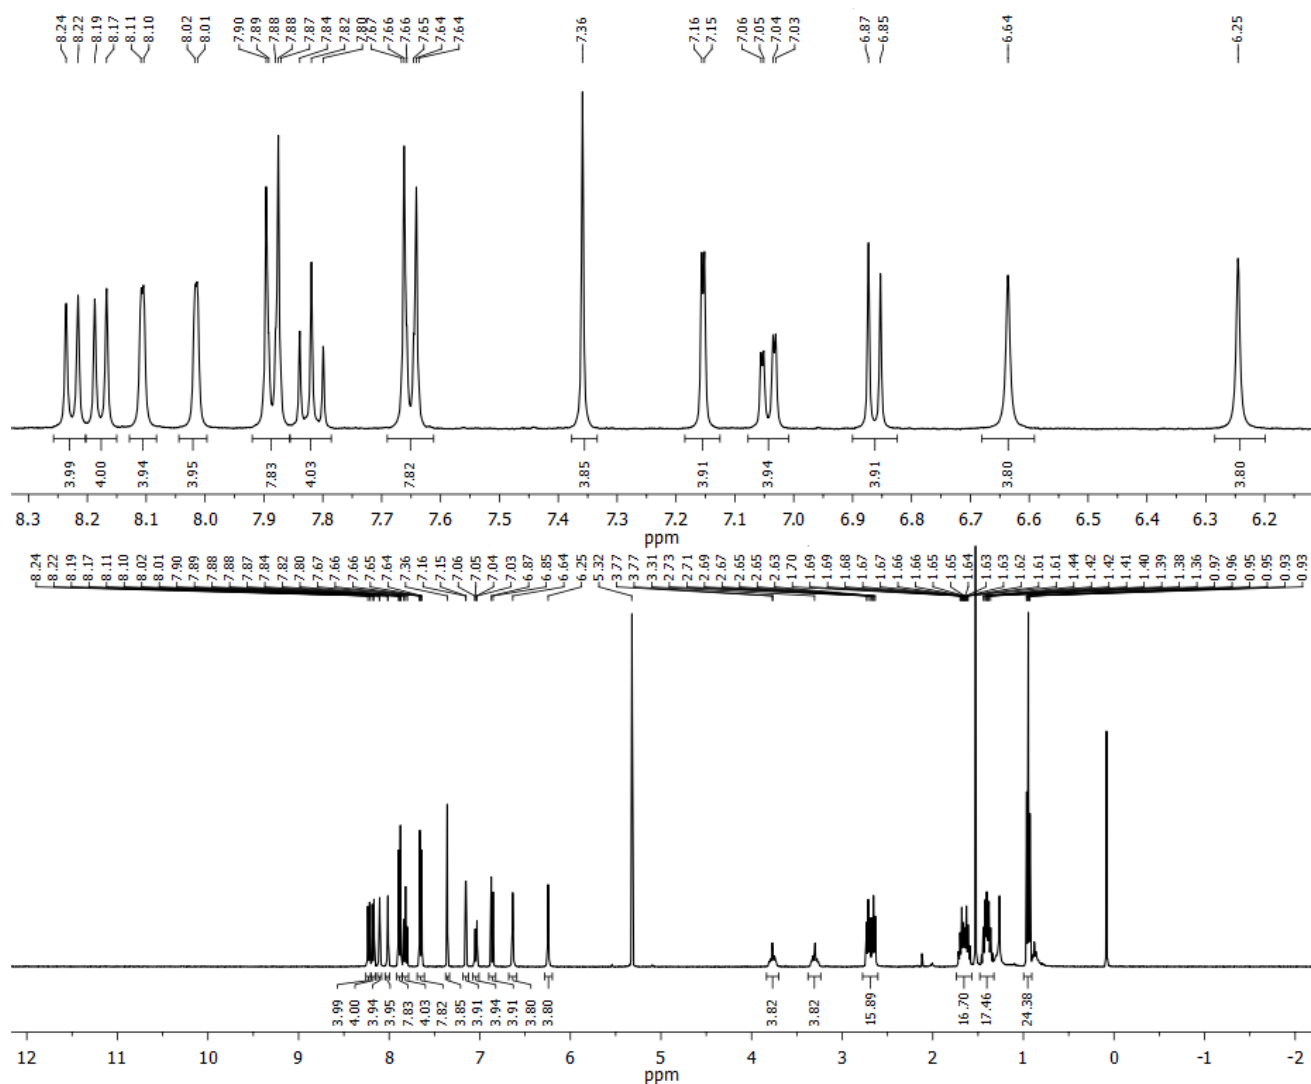

Figure S47.  $^1\text{H}$  NMR (400 MHz,  $\text{CD}_2\text{Cl}_2$ ) of (S)-7p.

Acquisition Parameter

|             |          |                      |          |                  |           |
|-------------|----------|----------------------|----------|------------------|-----------|
| Source Type | ESI      | Ion Polarity         | Positive | Set Nebulizer    | 1.2 Bar   |
| Focus       | Active   | Set Capillary        | 4500 V   | Set Dry Heater   | 300 °C    |
| Scan Begin  | 600 m/z  | Set End Plate Offset | -500 V   | Set Dry Gas      | 6.0 l/min |
| Scan End    | 2800 m/z | Set Charging Voltage | 0 V      | Set Divert Valve | Waste     |
|             |          | Set Corona           | 0 nA     | Set APCI Heater  | 0 °C      |

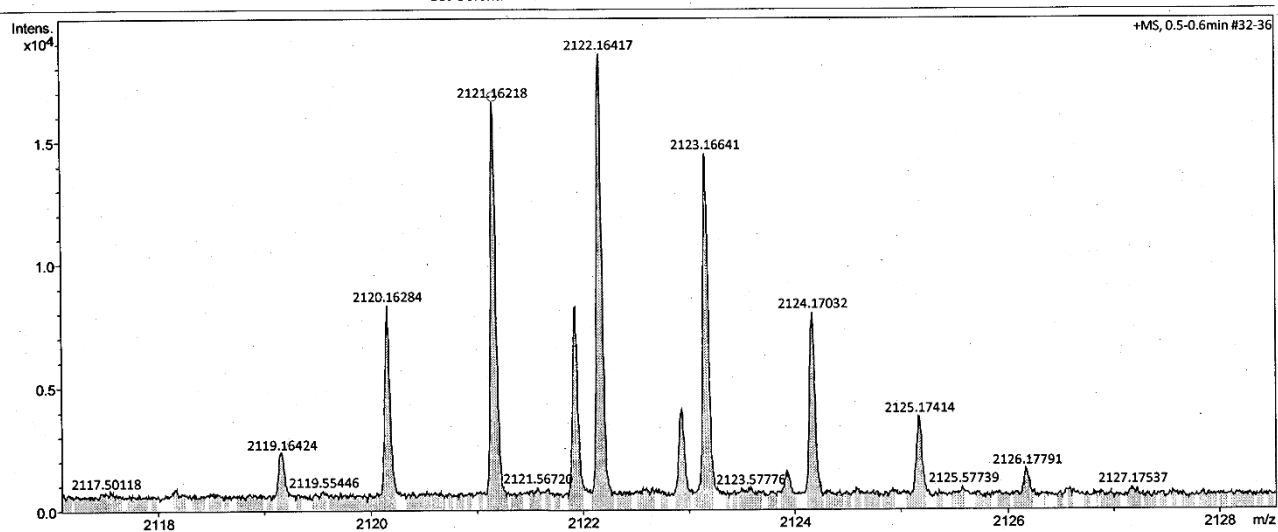

Figure S48. Experimental HR ESI-MS of rac-7p as  $[\text{M}]^+$ .



### 3. Optical Spectra: UV/Vis, Emission, Excitation, Emission lifetime

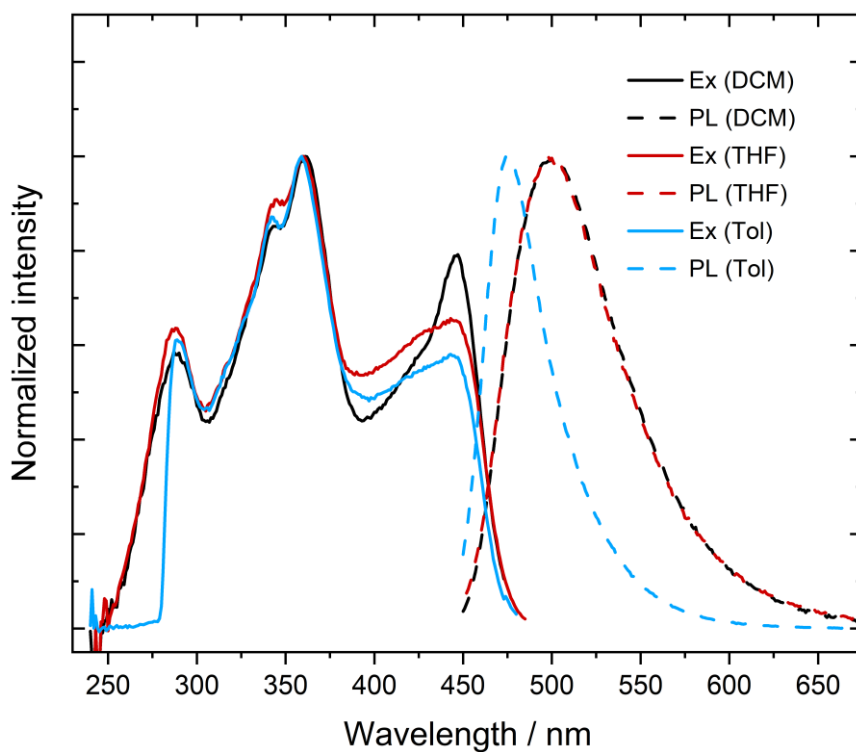

**Figure S49.** Emission and excitation spectra of *rac*-**6** in  $\text{CH}_2\text{Cl}_2$  ( $\lambda_{\text{ex}} = 445$  nm,  $\lambda_{\text{em}} = 493$  nm), THF ( $\lambda_{\text{ex}} = 492$  nm,  $\lambda_{\text{em}} = 446$  nm) and toluene ( $\lambda_{\text{ex}} = 445$  nm,  $\lambda_{\text{em}} = 476$  nm).

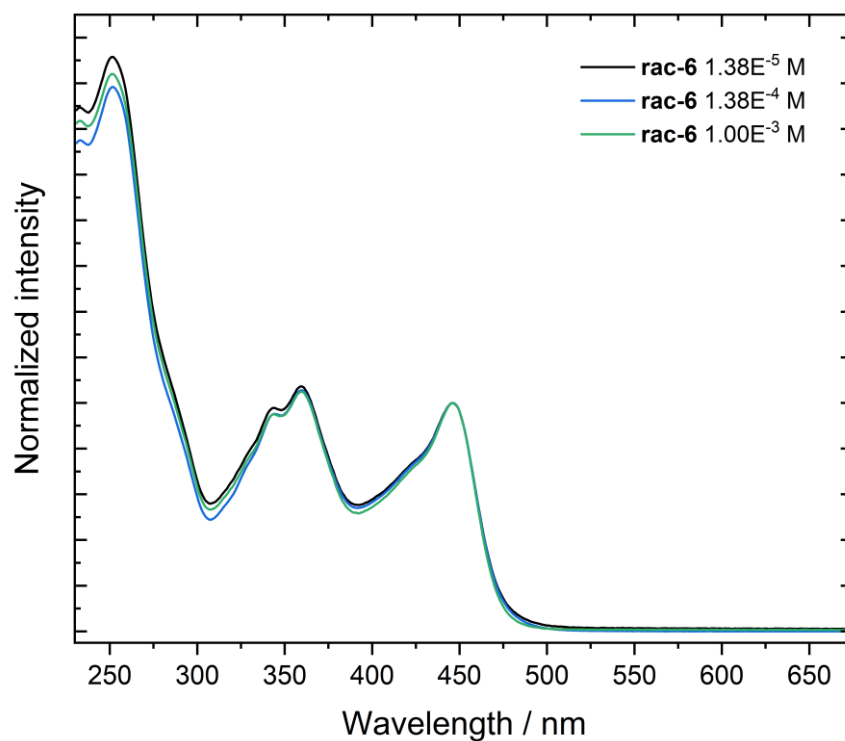

**Figure S50.** UV/Vis absorption spectra of differently concentrated solutions of *rac*-**6** in  $\text{CH}_2\text{Cl}_2$  ( $1.38 \cdot 10^{-5}$  M,  $1.38 \cdot 10^{-4}$  M, and  $1.00 \cdot 10^{-3}$  M).

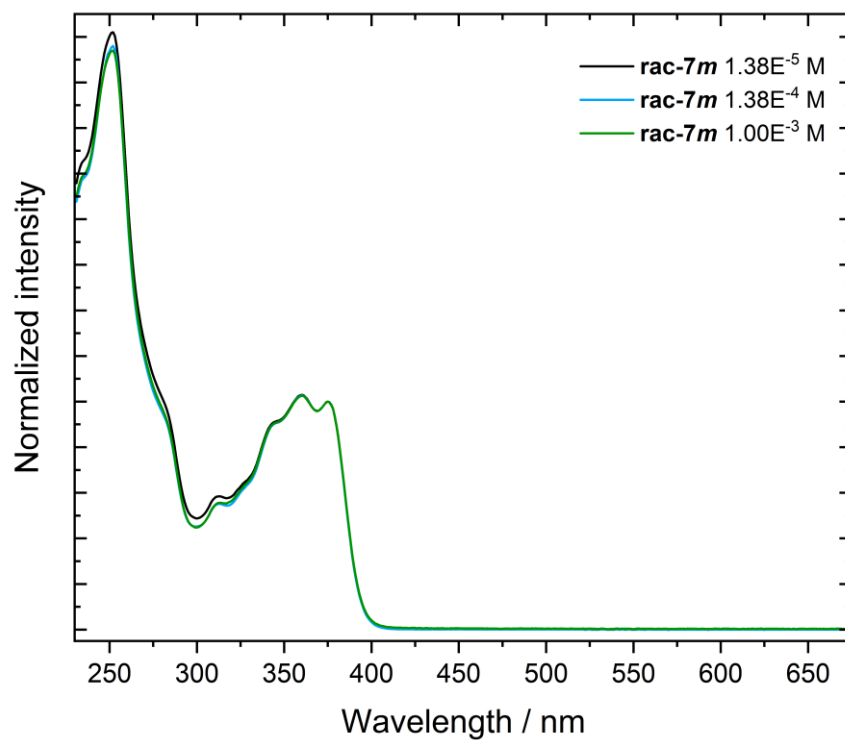

**Figure S51.** UV/Vis absorption spectra of differently concentrated solutions of *rac-7m* in  $\text{CH}_2\text{Cl}_2$  ( $1.38 \cdot 10^{-5}$  M,  $1.38 \cdot 10^{-4}$  M, and  $1.00 \cdot 10^{-3}$  M).

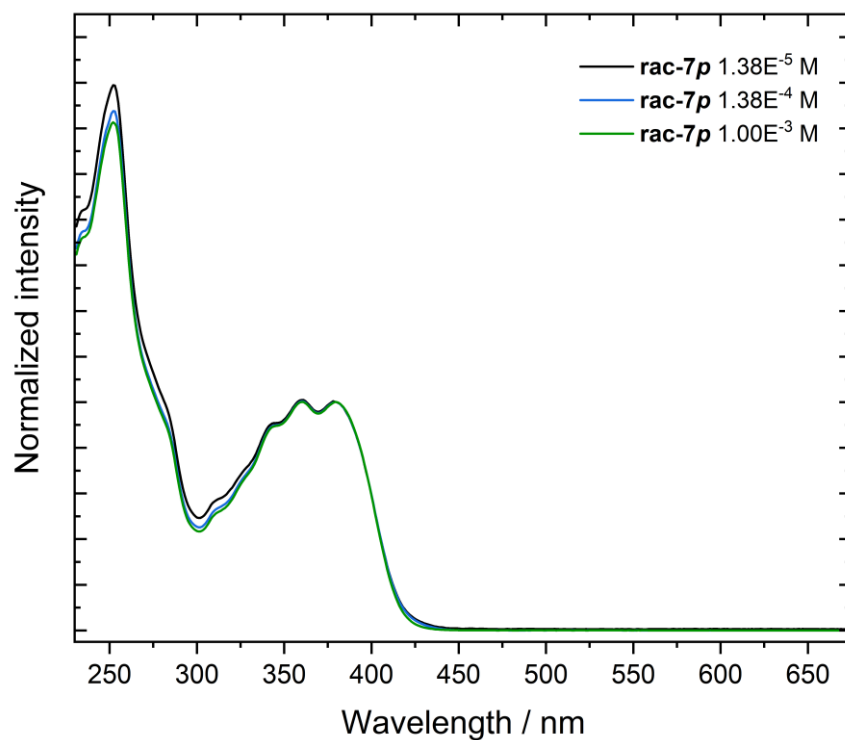

**Figure S52.** UV/Vis absorption spectra of differently concentrated solutions of *rac-7p* in  $\text{CH}_2\text{Cl}_2$  ( $1.38 \cdot 10^{-5}$  M,  $1.38 \cdot 10^{-4}$  M, and  $1.00 \cdot 10^{-3}$  M).

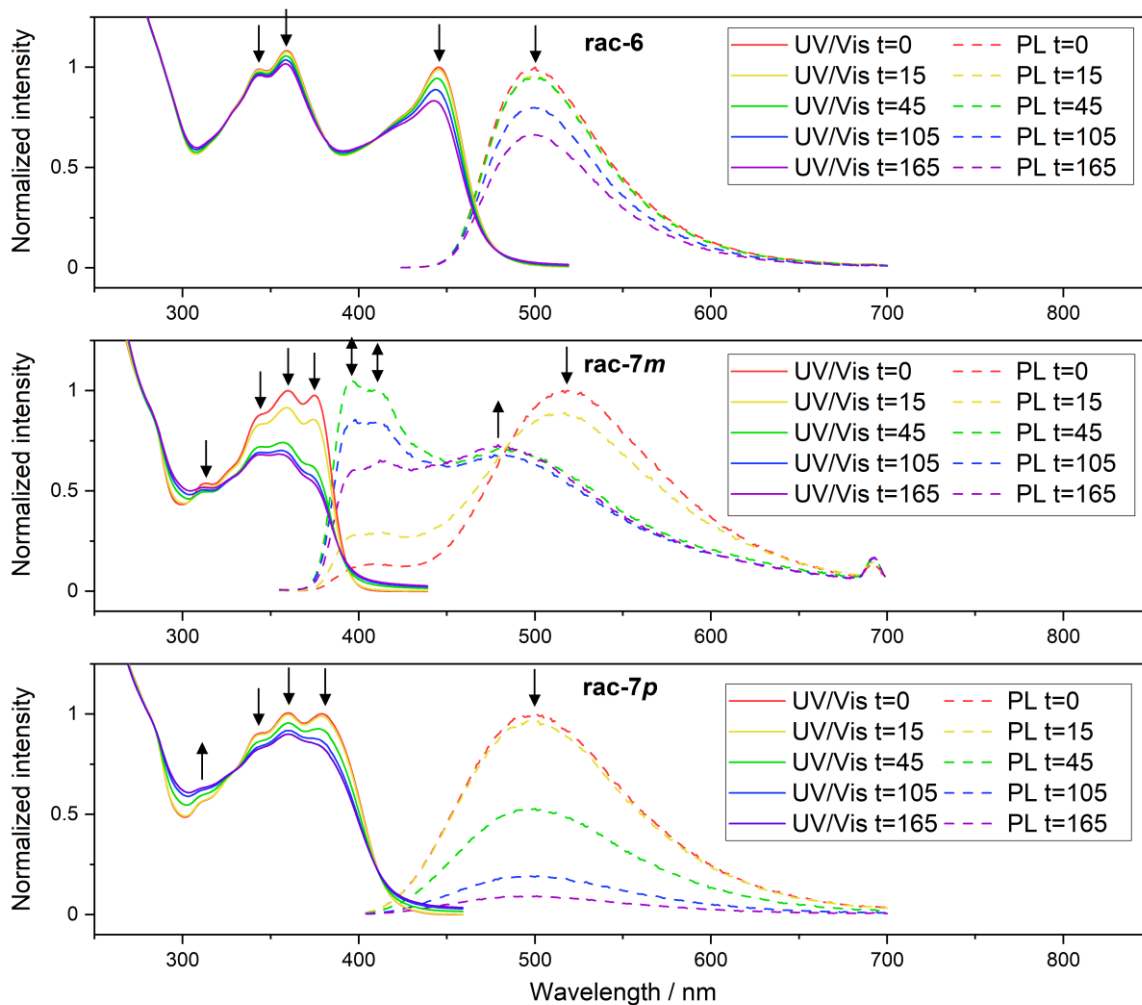

**Figure S53.** Photodegradation over time of solutions of *rac-6* (top), *rac-7m* (middle) and *rac-7p* (bottom) in  $\text{CH}_2\text{Cl}_2$  ( $1.00 \cdot 10^{-5}$  M) upon radiation with an UV-Lamp ( $\lambda = 366$  nm, 2.6 W). Normalization is done by dividing the spectra with the initial maxima at  $t = 0$  min. Times are given in minutes.

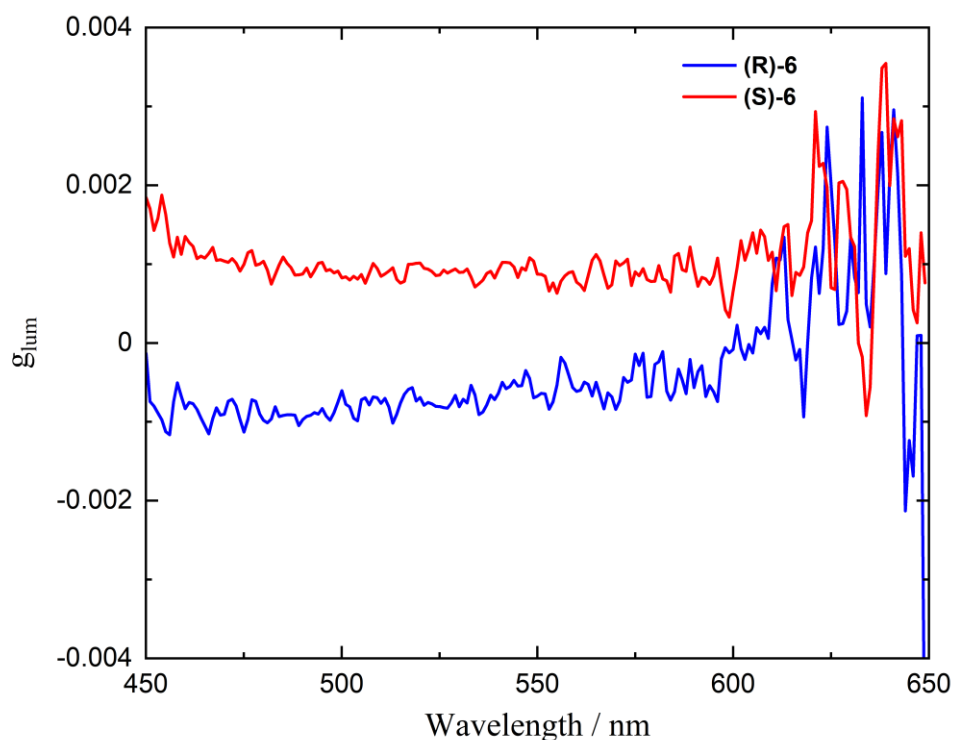

**Figure S54.**  $g_{lum}$  vs wavelength plot ( $\lambda_{ex} = 365$  nm,  $2.0 \cdot 10^{-4}$  M,  $\text{CH}_2\text{Cl}_2$ , 293 K). Note that on the red edge of the spectrum  $g_{lum}$  becomes undefined (and therefore erratic) as total luminescence ( $I_L + I_R$ ) approaches 0.

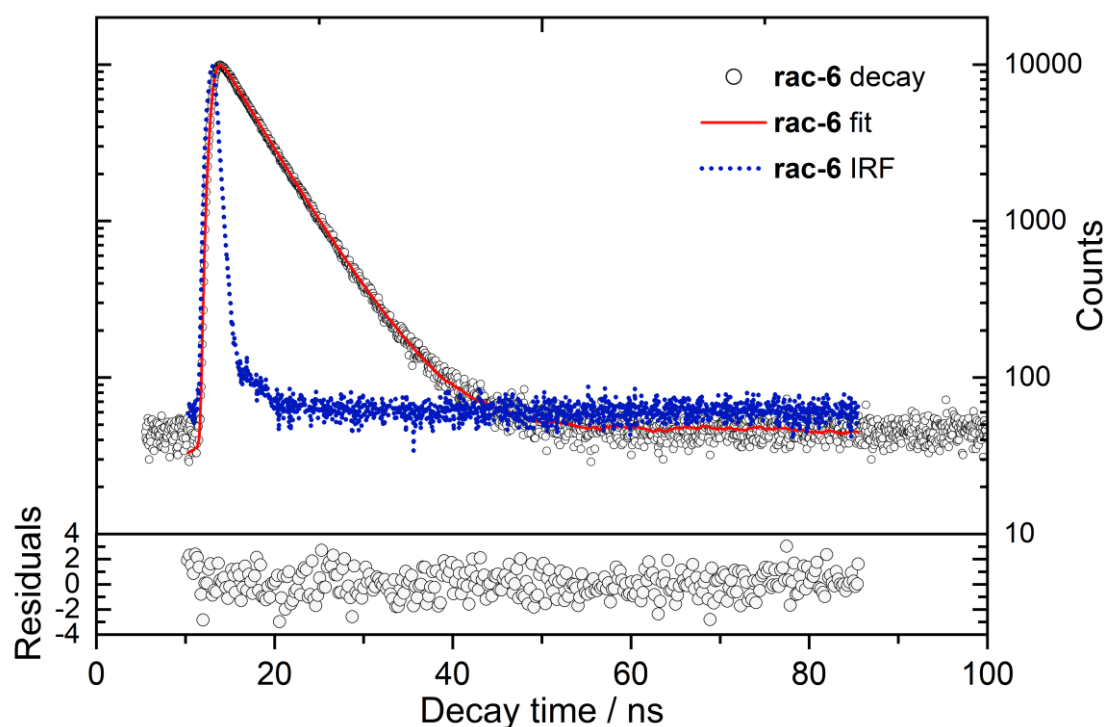

**Figure S55.** Time-resolved photoluminescence decay curves of rac-6. The decay is best fitted to a biexponential equation ( $\chi^2 = 1.07$ ) with 3.34 ns and 5.01 ns (24 % and 76 % relative amplitudes, respectively), taking into account the instruments response function (IRF) by an iterative reconvolution fitting method.

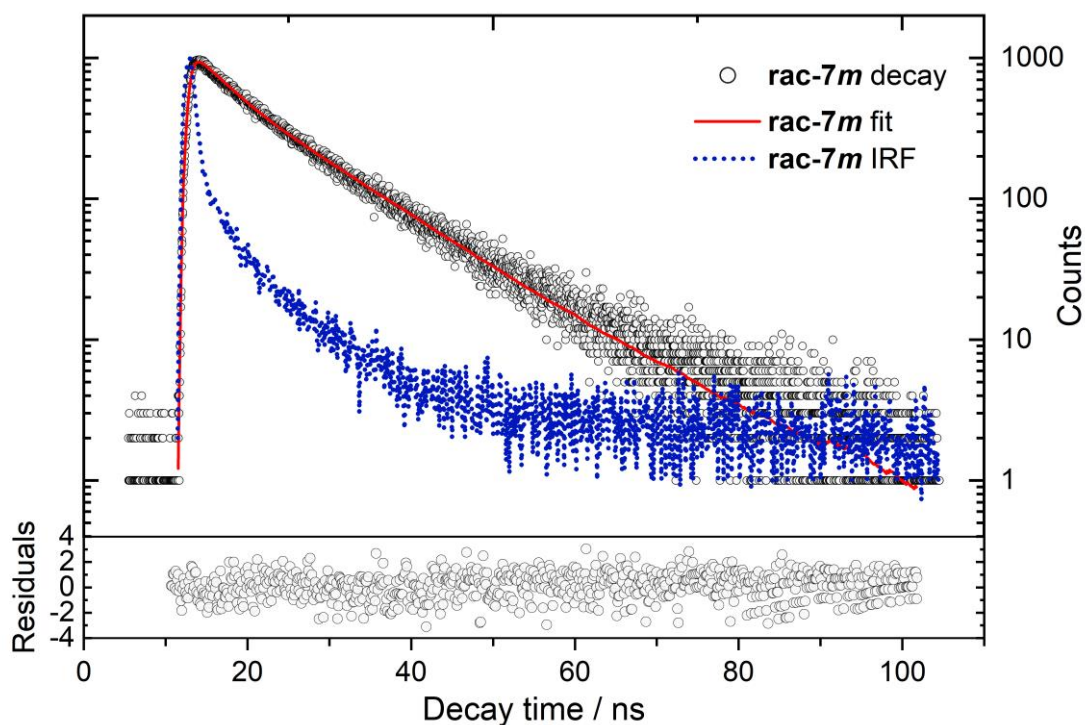

**Figure S56.** Time-resolved photoluminescence decay curves of *rac-7m*. The decay is best fitted to a biexponential equation ( $\chi^2 = 1.11$ ) with life times of 3.03 ns and 11.3 ns (36 % and 64 % relative amplitudes, respectively), taking into account the instruments response function (IRF) by an iterative reconvolution fitting method.

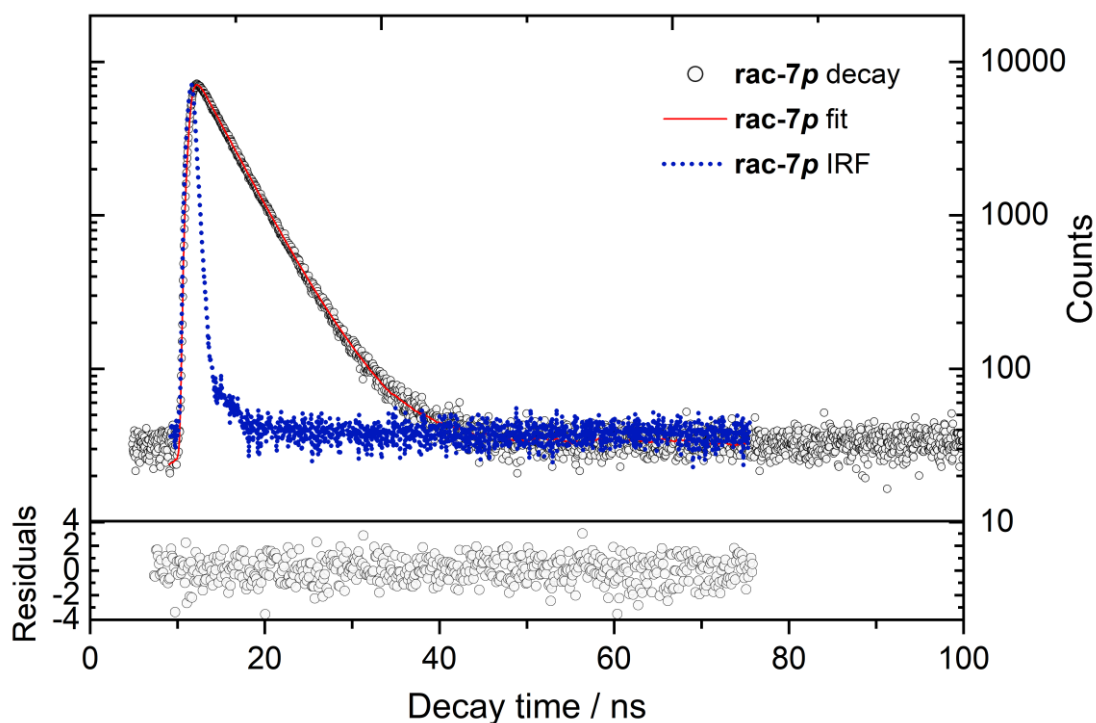

**Figure S57.** Time-resolved photoluminescence decay curves of *rac-7p*. The decay is best fitted to a biexponential equation ( $\chi^2 = 1.10$ ) with life times of 2.94 ns and 6.32 ns (29 % and 71 % relative amplitudes, respectively), taking into account the instruments response function (IRF) by an iterative reconvolution fitting method.

#### 4. Electrochemical studies

CH<sub>2</sub>Cl<sub>2</sub> stabilized with ethanol (CHEMSOLUTE; HPLC grade) was distilled over P<sub>2</sub>O<sub>5</sub> and then over K<sub>2</sub>CO<sub>3</sub>. CH<sub>3</sub>CN (Honeywell Riedel-de Haën; HPLC grade) was distilled successively over P<sub>2</sub>O<sub>5</sub>, CaH<sub>2</sub> and P<sub>2</sub>O<sub>5</sub>. The purified solvents were stored under Argon. *Tetrabutylammonium hexafluorophosphate* NBu<sub>4</sub>PF<sub>6</sub> (TCI; >98.0%) was recrystallized four times from water/ethanol (3:1) and lyophilized. As the supporting electrolyte, NBu<sub>4</sub>PF<sub>6</sub> was dissolved in concentrations of 0.1 M in CH<sub>2</sub>Cl<sub>2</sub> and CH<sub>3</sub>CN and the electrolytes were degassed by either freeze-pump-thaw or argon bubbling.

Electrochemical measurements were performed in a modified full-glass, gas-tight three-electrode cell as described previously.<sup>[7]</sup> All experiments were carried out at 17 °C under an argon atmosphere using an ECO-Autolab PGSTAT100 (Metrohm) instrument with GPES-Software 4.9.007. *iR* Drop was compensated by the positive feedback function of the software. A Pt disk electrode tip (Metrohm part no. 6.1204.310; nominal diameter 3 mm; electroactive area  $A = 0.066 \pm 0.003 \text{ cm}^2$ ) and a GC disk electrode tip (Metrohm part no. 6.1204.300; nominal diameter 3 mm; electroactive area  $A = 0.065 \pm 0.002 \text{ cm}^2$ ) were used as working electrodes for the positive and negative potential range, respectively. The electrodes were polished using a suspension of  $\alpha$ -alumina (Buehler) in deionised water prior to experiments. For the determination of the number of transferred electrons we used a combination of chronoamperometric data and steady-state currents at a microelectrode (Bioanalytical Systems microelectrode tip; nominal radius 50  $\mu\text{m}$ ; experimental determined radius  $r = 44.3 \pm 2.2 \mu\text{m}$ ).<sup>[8]</sup> As counter electrode we used a Pt wire (1 mm diameter). All potentials were determined *vs* Ag/Ag<sup>+</sup> (0.01 M in CH<sub>3</sub>CN/0.1 M NBu<sub>4</sub>PF<sub>6</sub>) by a Haber-Luggin double-reference electrode. The values were rescaled to an external Fc/Fc<sup>+</sup> standard ( $E^0(\text{Fc}/\text{Fc}^+) = 207 \pm 1 \text{ mV vs Ag}/\text{Ag}^+$  in CH<sub>2</sub>Cl<sub>2</sub>).

Scan rates for cyclic voltammograms ranged from 0.02 to 10 V/s. For chronoamperograms we used a step width between 2 and 8 s, while steady-state measurements were conducted at 0.001 to 0.004 V/s. To prove reproducibility all measurements were recorded at different concentrations within one experimental session, and sessions were repeated at least three times. Unless otherwise noted, all current data were background corrected and filtered by the PGSTAT 100's smooth functions Fourier transform (CV) and Savitzky-Golay (CA and microelectrode measurements).

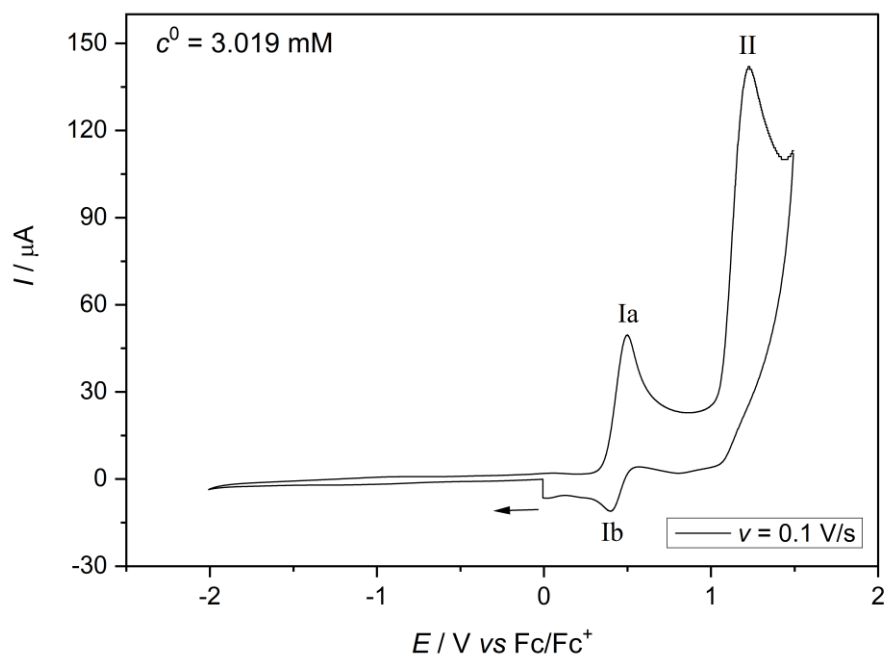

**Figure S58.** Cyclic voltammogram of NBN-benzotetracene (1) at  $\nu = 0.1$  V/s in  $\text{CH}_2\text{Cl}_2/0.1$  M  $\text{NBu}_4\text{PF}_6$  (not background corrected).

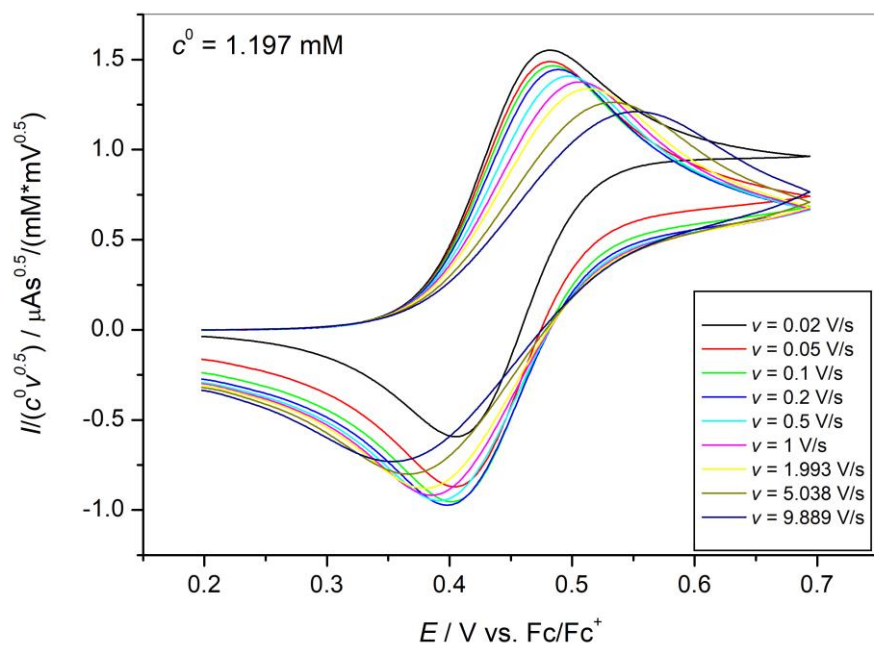

**Figure S59.** Normalized cyclic voltammogram of the first oxidation I of 1 at various scan rates  $\nu$  in  $\text{CH}_2\text{Cl}_2/0.1$  M  $\text{NBu}_4\text{PF}_6$ .

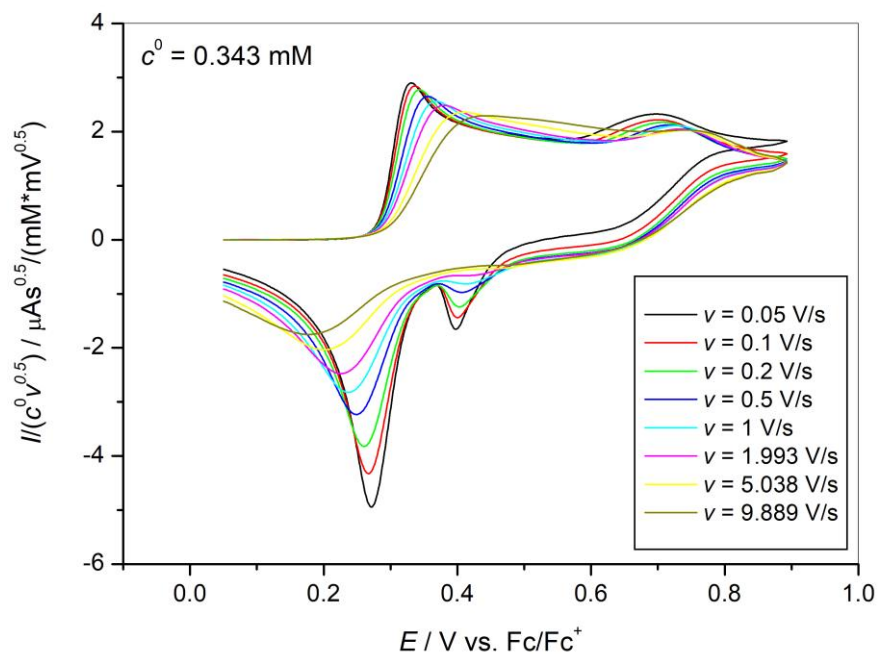

**Figure S60.** Normalized cyclic voltammograms of the first and second oxidations of rac-6 at various scan rates  $\nu$  in  $\text{CH}_2\text{Cl}_2/0.1 \text{ M NBu}_4\text{PF}_6$ .

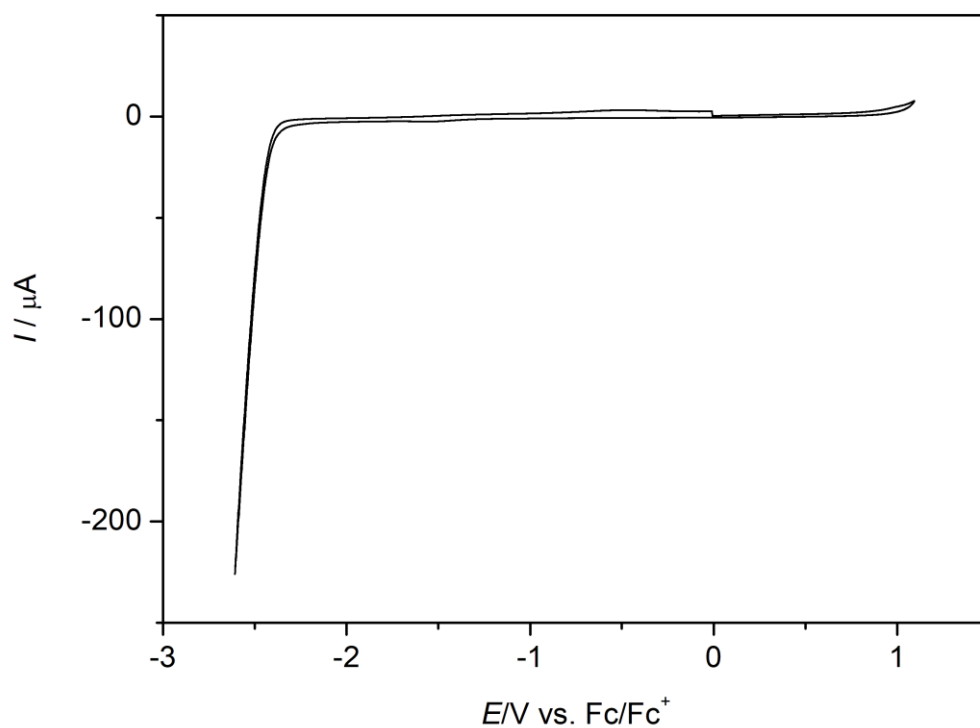

**Fig. S61:** Cyclic voltammogram of rac-5 at  $\nu = 0.2 \text{ V/s}$  in  $\text{CH}_2\text{Cl}_2/0.1 \text{ M NBu}_4\text{PF}_6$  (concentration  $c^0 = 0.901 \text{ mM}$ , GC electrode).



## 5. Computational studies

### Conformer Analysis and Frontier Molecular Orbitals

The structures were optimized using the TPSS<sup>[9]</sup> meta functional in conjunction and the resolution of the identity approximation (Figure S62). The study of Grimme et al. suggests that the description of the intermolecular interaction of the [2.2]PCP framework requires large Gaussian type basis sets.<sup>[10]</sup> For this reason, the geometry optimizations were performed using the def2-QZVP basis set along with the recommended fitting bases required for the RI approximation.<sup>[11,12]</sup> In addition, dispersion interactions between the NBN-moieties were dealt with using Grimme's D3 scheme along with Becke-Johnson damping.<sup>[13,14]</sup> The TPSS and computations were performed with the Turbomole program.<sup>[15]</sup>

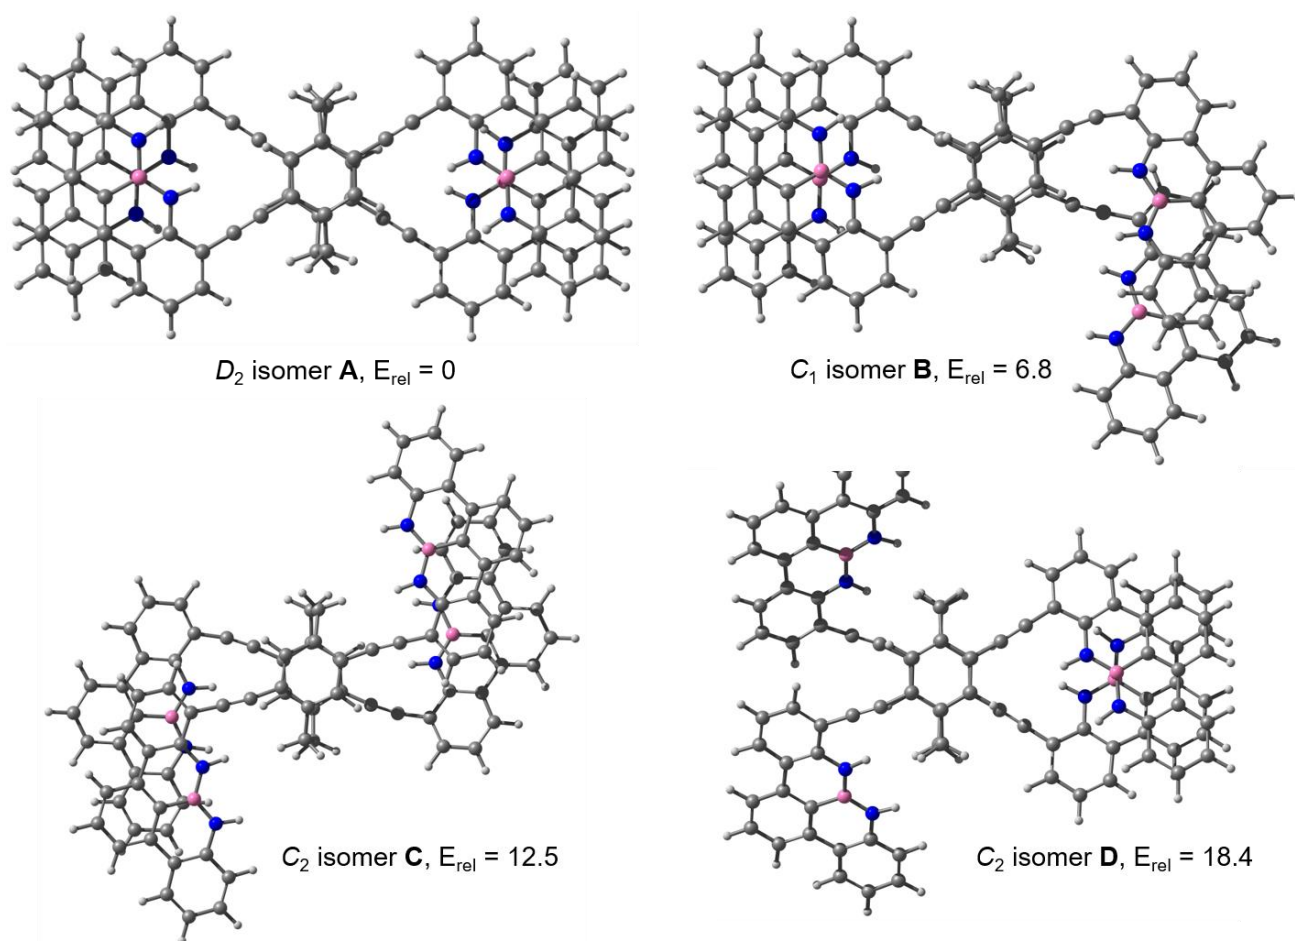

**Figure S62.** Computed structures of four isomers of the target compound (R)-**6'**. Relative energies computed at the RI-TPSS-D3(BJ)/def2-QZVP level of theory are given in kcal mol<sup>-1</sup>.

Based on the most favorable  $D_2$  isomer of **6'**, the compounds with one (“monomer”) and two NBN-tetracene units were computed at the RI-TPSS-D3(BJ)/def2-QZVP level of theory. The latter have their NBN-tetracene units either attached to two different PCP arene rings allowing face-to-face interaction (“dimer through space”) or to the same PCP arene ring allowing conjugation through its  $\pi$  system (“dimer through bond”). The frontier molecular orbital energies and energy gaps were computed (see Figure S63) in subsequent single point

computations using the B3LYP<sup>[16,17]</sup> hybrid density functional in conjunction with the def2-QZVP basis set with the Gaussian 16 program.<sup>[18]</sup>

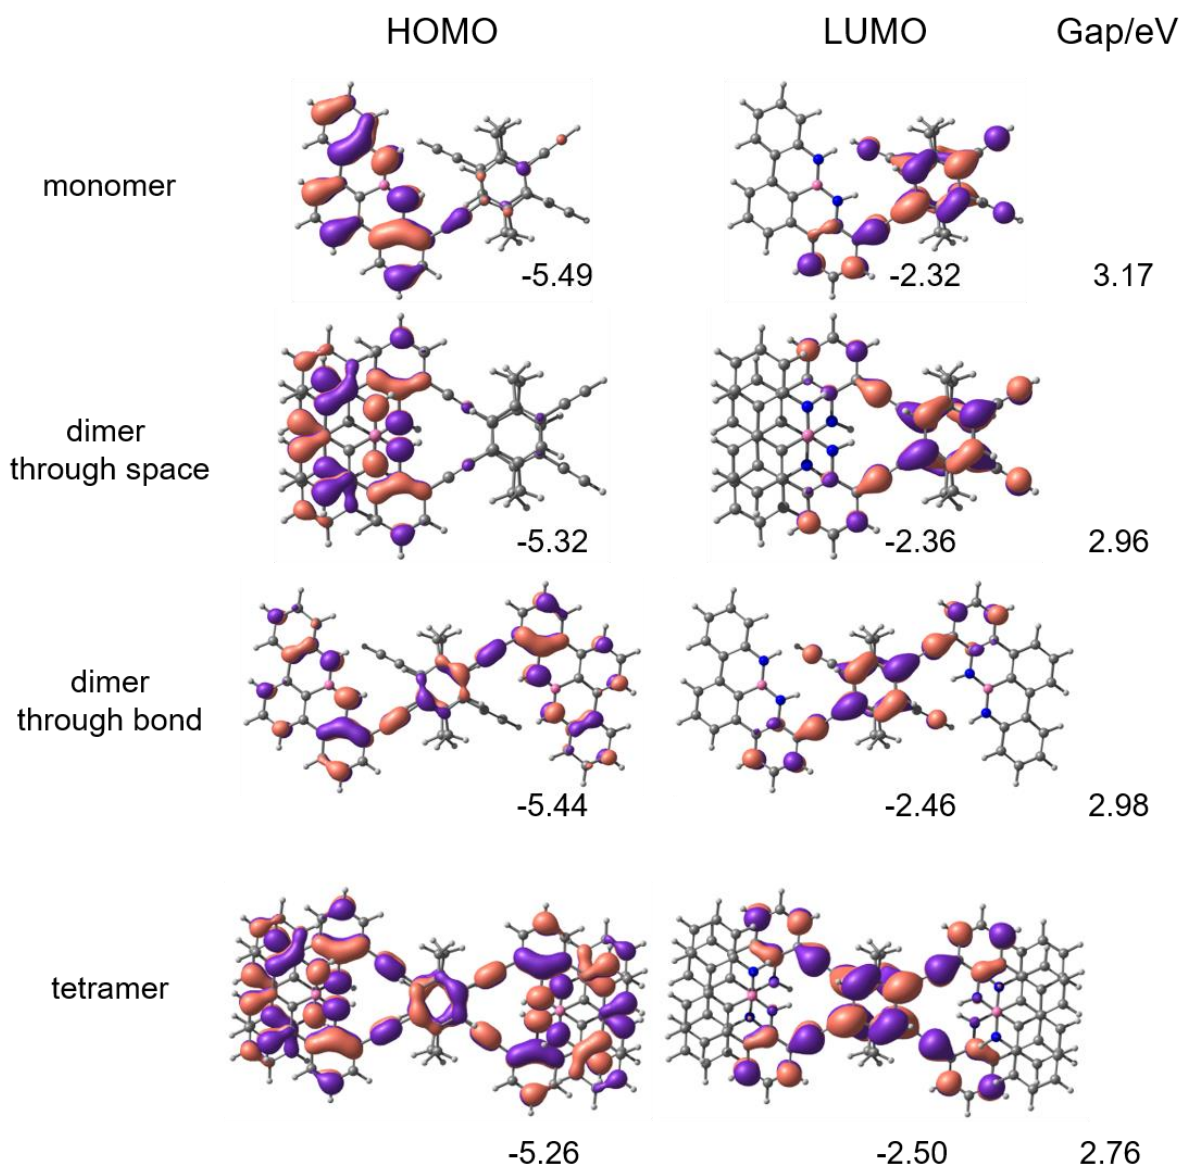

**Figure S63.** Frontier molecular orbitals, their energies (in eV) and energy gap (in eV) as computed at the B3LYP/def2-QZVP//RI-TPSS-D3(BJ)/def2-QZVP level of theory.

Comparison of the molecular orbitals and their energies for “monomer”, “dimers” and “tetramer” shows that the  $\pi$  orbitals of the PCP mix into the HOMO of the NBN-tetracene unit once through bond conjugation is possible between these units. The LUMO is located primarily on the PCP core for the entire series. Due to through-bond conjugation, the HOMO energy is hardly changed while the LUMO energy is lowered. The through space interaction in the dimer raises the energy of the HOMO and hardly effects the energy of the LUMO. A combination of through space and through bond interactions in the tetramer results in a higher HOMO and lower LUMO energy, and thus the smallest HOMO-LUMO energy gap of 2.76 eV that is in good agreement with the optical gap.

## Optical spectra (Absorption and ECD)

The energy of the lowest excited states and associated oscillator strengths were computed at the optimized geometry (RI-TPSS-D3(BJ)/def2-QZVP) using the algebraic diagrammatic construction through second order ADC(2)<sup>[19]</sup> and time-dependent density functional theory (TD-DFT)<sup>[20]</sup> along with the def2-TZVP basis set.<sup>[21]</sup> The CAM-B3LYP,<sup>[22]</sup>  $\omega$ B97XD,<sup>[23]</sup> and M06-2X<sup>[24]</sup> functionals were chosen. To speed-up the ADC(2) computations, the resolution of the identity approximation<sup>[25]</sup> along with the recommended fitting basis set was employed.<sup>[21]</sup> The ADC(2) computations were performed with the Turbomole program,<sup>[15]</sup> while the TD-DFT computations were run with Gaussian 16.<sup>[18]</sup> Using the M06-2X functional, the 100 lowest energy excited states were computed for plotting of the absorption and ECD spectra below (Figures S64 and S65).

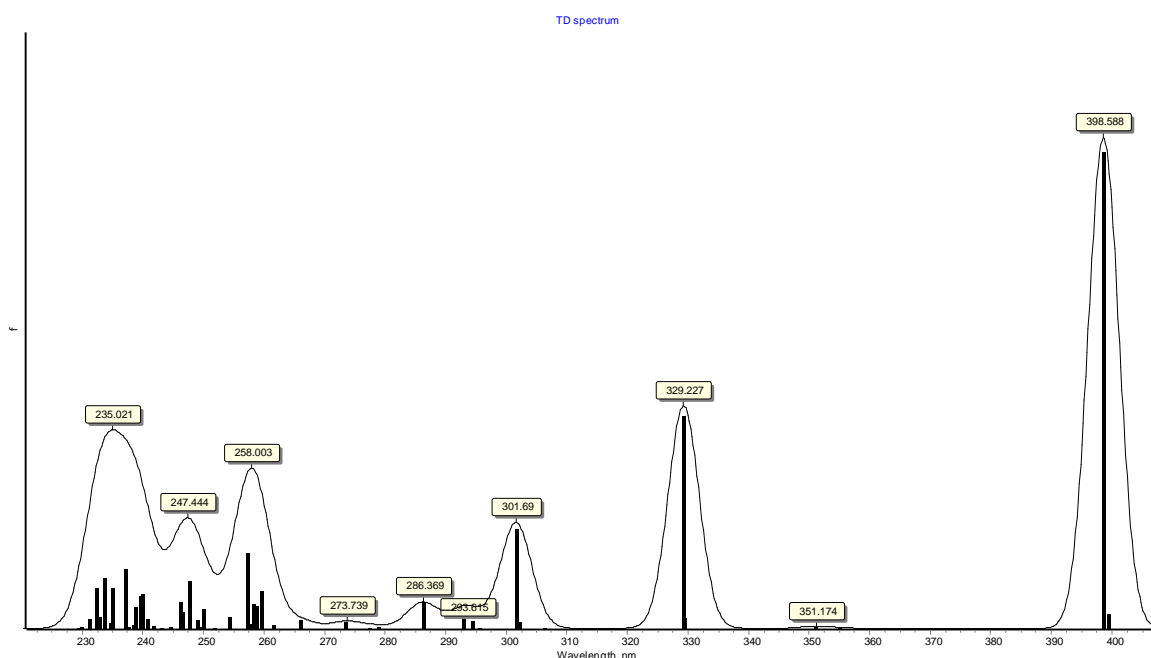

**Figure S64.** Absorption spectrum of (R)-6' including the first 100 excited states computed at the M062X/def2-TZVP level of theory.

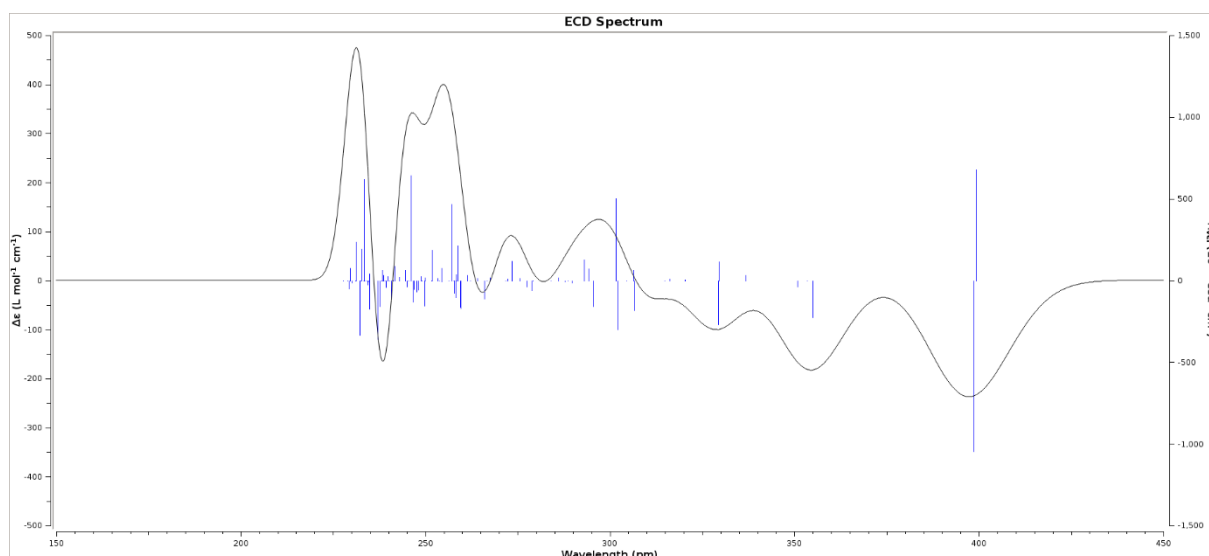

**Figure S65.** ECD spectrum of (R)-6' including the first 100 excited states computed at the M062X/def2-TZVP level of theory.

### Dissymmetry Factor $g_{\text{lum,calcd}}$ .

For detailed information on the procedure to calculate the  $g_{\text{lum}}$  value of compounds we refer to Kubo et al.<sup>[26]</sup> The geometries of the  $S_1$  states were optimized by analytic gradients<sup>[27,28]</sup> using TD-DFT along with the def2-SV(P)<sup>[29]</sup> basis set. For (R)-6', Ph-PCP, Naph-PCP, and Anth-PCP' the meta-hybrid GGA M06-2X<sup>[24]</sup> functional was used, while (R)-6' was also studied with the Coulomb-attenuating method corrected CAM-B3LYP<sup>[22]</sup> (with and without using Grimme's D3 scheme along with Becke-Johnson damping)<sup>[13,14]</sup> and  $\omega$ B97XD<sup>[23]</sup> functionals. These computations were run with the *Gaussian* 16 package.<sup>[18]</sup>

The dissymmetry factor  $g_{\text{lum,calcd}}$  was calculated as follows:  $g = 4R/(D+G)$ . R is the rotatory strength defined by the inner product of transition electric and magnetic dipole moments (it can be either calculated via  $R = |\mu_e \cdot \mu_m| \cdot \cos\theta$  or taken from the R(length) column in the tables below), and D and G are the electric and magnetic dipole strengths defined by the square of transition electric and magnetic dipole moments, respectively ( $D = |\mu_e|^2$ ;  $G = |\mu_m|^2$ ).  $E_{\text{ex}}$  is the excitation energy calculated by TD-DFT method.

**Table S1.** Cartesian coordinates (Å) and transition moments of optimized structure of (R)-6' in the lowest-energy excited state ( $S_1$ ) calculated at the M06-2X/def2-SV(P) level of theory.

| Center Number | Atomic Number | Atomic Type | Coordinates (Angstroms) |           |           |
|---------------|---------------|-------------|-------------------------|-----------|-----------|
|               |               |             | X                       | Y         | Z         |
| 1             | 6             | 0           | 0.074347                | 1.417330  | -1.420925 |
| 2             | 6             | 0           | 1.222457                | 0.643868  | -1.554322 |
| 3             | 6             | 0           | 1.171649                | -0.764474 | -1.548419 |
| 4             | 6             | 0           | -0.074328               | -1.417247 | -1.420907 |

|    |   |   |            |           |           |
|----|---|---|------------|-----------|-----------|
| 5  | 6 | 0 | -1.222430  | -0.643784 | -1.554440 |
| 6  | 6 | 0 | -1.171626  | 0.764562  | -1.548569 |
| 7  | 1 | 0 | 2.200554   | 1.129410  | -1.496399 |
| 8  | 1 | 0 | -2.200532  | -1.129330 | -1.496605 |
| 9  | 6 | 0 | 0.172610   | 2.802585  | -0.827102 |
| 10 | 1 | 0 | -0.507247  | 3.506757  | -1.332982 |
| 11 | 1 | 0 | 1.201135   | 3.172755  | -0.962207 |
| 12 | 6 | 0 | -0.178394  | 2.805951  | 0.721253  |
| 13 | 1 | 0 | -1.203954  | 3.184566  | 0.853978  |
| 14 | 1 | 0 | 0.507654   | 3.506788  | 1.224981  |
| 15 | 6 | 0 | 0.094070   | -1.424504 | 1.321034  |
| 16 | 6 | 0 | 1.227468   | -0.661785 | 1.459787  |
| 17 | 6 | 0 | 1.181617   | 0.770154  | 1.457721  |
| 18 | 6 | 0 | -0.094288  | 1.424432  | 1.321030  |
| 19 | 6 | 0 | -1.227702  | 0.661708  | 1.459652  |
| 20 | 6 | 0 | -1.181857  | -0.770240 | 1.457599  |
| 21 | 1 | 0 | 2.207071   | -1.140674 | 1.375972  |
| 22 | 1 | 0 | -2.207292  | 1.140595  | 1.375711  |
| 23 | 6 | 0 | 0.178266   | -2.805987 | 0.721198  |
| 24 | 6 | 0 | -0.172628  | -2.802551 | -0.827184 |
| 25 | 1 | 0 | 0.507288   | -3.506695 | -1.333026 |
| 26 | 1 | 0 | -1.201131  | -3.172732 | -0.962410 |
| 27 | 1 | 0 | -0.507775  | -3.506877 | 1.224863  |
| 28 | 1 | 0 | 1.203843   | -3.184564 | 0.853964  |
| 29 | 6 | 0 | -2.391041  | 1.502881  | -1.450971 |
| 30 | 6 | 0 | -3.426455  | 2.136190  | -1.339640 |
| 31 | 6 | 0 | 2.391058   | -1.502790 | -1.450727 |
| 32 | 6 | 0 | 3.426454   | -2.136120 | -1.339348 |
| 33 | 6 | 0 | -2.368110  | -1.498531 | 1.378054  |
| 34 | 6 | 0 | -3.417182  | -2.141960 | 1.268141  |
| 35 | 6 | 0 | 2.367893   | 1.498425  | 1.378274  |
| 36 | 6 | 0 | 3.416990   | 2.141791  | 1.268240  |
| 37 | 6 | 0 | -7.021200  | 4.313590  | -1.098679 |
| 38 | 6 | 0 | -5.807107  | 4.981604  | -0.980478 |
| 39 | 6 | 0 | -4.619407  | 4.261390  | -1.055477 |
| 40 | 6 | 0 | -4.646786  | 2.873988  | -1.236076 |
| 41 | 1 | 0 | -7.941435  | 4.895503  | -1.038572 |
| 42 | 1 | 0 | -5.787992  | 6.063891  | -0.839857 |
| 43 | 1 | 0 | -3.651462  | 4.761658  | -0.982842 |
| 44 | 6 | 0 | -7.102788  | 2.924519  | -1.282426 |
| 45 | 6 | 0 | -5.889866  | 2.188287  | -1.335049 |
| 46 | 7 | 0 | -5.893998  | 0.816046  | -1.476842 |
| 47 | 6 | 0 | -8.406711  | 2.235525  | -1.403208 |
| 48 | 1 | 0 | -4.971265  | 0.389371  | -1.511496 |
| 49 | 5 | 0 | -7.105953  | 0.060571  | -1.561179 |
| 50 | 6 | 0 | -8.429261  | 0.829194  | -1.538334 |
| 51 | 6 | 0 | -9.642854  | 0.112266  | -1.634605 |
| 52 | 7 | 0 | -7.161062  | -1.358487 | -1.652870 |
| 53 | 1 | 0 | -6.332350  | -1.945596 | -1.627931 |
| 54 | 6 | 0 | -9.600165  | -1.360541 | -1.755294 |
| 55 | 6 | 0 | -8.360777  | -2.049633 | -1.756462 |
| 56 | 6 | 0 | -8.338669  | -3.451826 | -1.854903 |
| 57 | 6 | 0 | -9.513910  | -4.180187 | -1.947157 |
| 58 | 6 | 0 | -10.744523 | -3.515475 | -1.951860 |

|     |   |   |            |           |           |
|-----|---|---|------------|-----------|-----------|
| 59  | 6 | 0 | -10.771082 | -2.131465 | -1.859890 |
| 60  | 1 | 0 | -7.370735  | -3.961388 | -1.849784 |
| 61  | 1 | 0 | -9.471652  | -5.269722 | -2.023200 |
| 62  | 1 | 0 | -11.677998 | -4.076423 | -2.031572 |
| 63  | 1 | 0 | -11.739942 | -1.630151 | -1.865452 |
| 64  | 6 | 0 | 7.021098   | -4.313698 | -1.098500 |
| 65  | 6 | 0 | 4.646756   | -2.873973 | -1.235851 |
| 66  | 6 | 0 | 4.619306   | -4.261364 | -1.055197 |
| 67  | 6 | 0 | 5.806970   | -4.981641 | -0.980228 |
| 68  | 1 | 0 | 7.941299   | -4.895666 | -1.038421 |
| 69  | 1 | 0 | 3.651336   | -4.761574 | -0.982480 |
| 70  | 1 | 0 | 5.787800   | -6.063922 | -0.839566 |
| 71  | 6 | 0 | 5.889868   | -2.188349 | -1.334925 |
| 72  | 6 | 0 | 7.102754   | -2.924639 | -1.282309 |
| 73  | 6 | 0 | 8.406711   | -2.235720 | -1.403177 |
| 74  | 5 | 0 | 7.106057   | -0.060703 | -1.561115 |
| 75  | 6 | 0 | 8.429329   | -0.829387 | -1.538271 |
| 76  | 6 | 0 | 9.642955   | -0.112526 | -1.634622 |
| 77  | 6 | 0 | 8.360987   | 2.049437  | -1.756425 |
| 78  | 6 | 0 | 9.600342   | 1.360286  | -1.755272 |
| 79  | 6 | 0 | 10.771299  | 2.131159  | -1.859764 |
| 80  | 6 | 0 | 10.744809  | 3.515174  | -1.951692 |
| 81  | 6 | 0 | 9.514227   | 4.179942  | -1.947014 |
| 82  | 6 | 0 | 8.338947   | 3.451632  | -1.854819 |
| 83  | 1 | 0 | 11.740141  | 1.629810  | -1.865227 |
| 84  | 1 | 0 | 11.678316  | 4.076081  | -2.031310 |
| 85  | 1 | 0 | 9.472021   | 5.269481  | -2.023030 |
| 86  | 1 | 0 | 7.371035   | 3.961239  | -1.849710 |
| 87  | 6 | 0 | 4.611688   | 2.872542  | 1.184861  |
| 88  | 6 | 0 | 4.598166   | 4.272468  | 0.994711  |
| 89  | 6 | 0 | 5.786911   | 4.979355  | 0.947240  |
| 90  | 6 | 0 | 7.008355   | 4.312884  | 1.095097  |
| 91  | 1 | 0 | 5.775328   | 6.061557  | 0.802041  |
| 92  | 1 | 0 | 7.926781   | 4.898455  | 1.051326  |
| 93  | 1 | 0 | 3.634790   | 4.776193  | 0.895843  |
| 94  | 6 | 0 | 7.088116   | 2.926671  | 1.285676  |
| 95  | 6 | 0 | 5.872297   | 2.188248  | 1.312169  |
| 96  | 7 | 0 | 5.870975   | 0.827384  | 1.454353  |
| 97  | 6 | 0 | 8.385216   | 2.235670  | 1.436586  |
| 98  | 1 | 0 | 4.946779   | 0.399587  | 1.455104  |
| 99  | 6 | 0 | 8.403471   | 0.829165  | 1.573873  |
| 100 | 5 | 0 | 7.083124   | 0.063446  | 1.564365  |
| 101 | 7 | 0 | 7.125987   | -1.353140 | 1.658365  |
| 102 | 6 | 0 | 9.612592   | 0.109337  | 1.696280  |
| 103 | 1 | 0 | 6.296717   | -1.937653 | 1.600068  |
| 104 | 6 | 0 | 8.320244   | -2.047871 | 1.788816  |
| 105 | 6 | 0 | 9.561871   | -1.361886 | 1.816138  |
| 106 | 6 | 0 | 10.727589  | -2.137580 | 1.946995  |
| 107 | 6 | 0 | 10.692819  | -3.520856 | 2.038071  |
| 108 | 6 | 0 | 9.459746   | -4.182076 | 2.005186  |
| 109 | 6 | 0 | 8.290005   | -3.450382 | 1.886516  |
| 110 | 1 | 0 | 11.697891  | -1.639904 | 1.973894  |
| 111 | 1 | 0 | 11.622023  | -4.085628 | 2.138033  |
| 112 | 1 | 0 | 9.412713   | -5.271470 | 2.079483  |

|     |   |   |            |           |           |
|-----|---|---|------------|-----------|-----------|
| 113 | 1 | 0 | 7.320574   | -3.956216 | 1.857779  |
| 114 | 6 | 0 | -7.008687  | -4.312876 | 1.095764  |
| 115 | 6 | 0 | -4.611922  | -2.872672 | 1.185104  |
| 116 | 6 | 0 | -4.598496  | -4.272644 | 0.995254  |
| 117 | 6 | 0 | -5.787289  | -4.979468 | 0.948038  |
| 118 | 1 | 0 | -7.927153  | -4.898400 | 1.052188  |
| 119 | 1 | 0 | -3.635154  | -4.776449 | 0.896444  |
| 120 | 1 | 0 | -5.775783  | -6.061710 | 0.803134  |
| 121 | 6 | 0 | -5.872477  | -2.188281 | 1.312324  |
| 122 | 6 | 0 | -7.088349  | -2.926609 | 1.285964  |
| 123 | 6 | 0 | -8.385394  | -2.235457 | 1.436642  |
| 124 | 7 | 0 | -5.871030  | -0.827401 | 1.454320  |
| 125 | 1 | 0 | -4.946797  | -0.399685 | 1.454988  |
| 126 | 5 | 0 | -7.083110  | -0.063350 | 1.564350  |
| 127 | 6 | 0 | -8.403521  | -0.828949 | 1.573915  |
| 128 | 6 | 0 | -9.612579  | -0.108999 | 1.696229  |
| 129 | 7 | 0 | -7.125844  | 1.353243  | 1.658256  |
| 130 | 1 | 0 | -6.296528  | 1.937681  | 1.599867  |
| 131 | 6 | 0 | -9.561716  | 1.362212  | 1.816152  |
| 132 | 6 | 0 | -8.320028  | 2.048085  | 1.788778  |
| 133 | 6 | 0 | -8.289658  | 3.450595  | 1.886447  |
| 134 | 6 | 0 | -9.459325  | 4.182392  | 2.005208  |
| 135 | 6 | 0 | -10.692453 | 3.521280  | 2.038200  |
| 136 | 6 | 0 | -10.727353 | 2.138008  | 1.947113  |
| 137 | 1 | 0 | -7.320187  | 3.956346  | 1.857617  |
| 138 | 1 | 0 | -9.412188  | 5.271782  | 2.079494  |
| 139 | 1 | 0 | -11.621598 | 4.086132  | 2.138260  |
| 140 | 1 | 0 | -11.697698 | 1.640416  | 1.974088  |
| 141 | 7 | 0 | 5.894065   | -0.816118 | -1.476787 |
| 142 | 1 | 0 | 4.971349   | -0.389401 | -1.511431 |
| 143 | 7 | 0 | 7.161238   | 1.358348  | -1.652840 |
| 144 | 1 | 0 | 6.332552   | 1.945496  | -1.627980 |
| 145 | 6 | 0 | 9.626806   | -2.923823 | -1.370973 |
| 146 | 6 | 0 | 10.844922  | -0.834278 | -1.592883 |
| 147 | 6 | 0 | 10.824290  | -2.220082 | -1.465459 |
| 148 | 1 | 0 | 11.809251  | -0.328555 | -1.654448 |
| 149 | 1 | 0 | 11.768904  | -2.768941 | -1.429457 |
| 150 | 1 | 0 | 9.667259   | -4.007851 | -1.261891 |
| 151 | 6 | 0 | 10.817357  | 0.828757  | 1.679229  |
| 152 | 6 | 0 | 9.607655   | 2.920997  | 1.429635  |
| 153 | 6 | 0 | 10.801539  | 2.214471  | 1.550061  |
| 154 | 1 | 0 | 11.779164  | 0.321040  | 1.760542  |
| 155 | 1 | 0 | 9.652197   | 4.004756  | 1.319457  |
| 156 | 1 | 0 | 11.747668  | 2.761497  | 1.532483  |
| 157 | 6 | 0 | -9.607909  | -2.920647 | 1.429441  |
| 158 | 6 | 0 | -10.817418 | -0.828289 | 1.678978  |
| 159 | 6 | 0 | -10.801732 | -2.213996 | 1.549708  |
| 160 | 1 | 0 | -11.779183 | -0.320472 | 1.760166  |
| 161 | 1 | 0 | -11.747921 | -2.760911 | 1.531907  |
| 162 | 1 | 0 | -9.652557  | -4.004388 | 1.319126  |
| 163 | 6 | 0 | -10.844860 | 0.833949  | -1.592739 |
| 164 | 6 | 0 | -9.626844  | 2.923557  | -1.370877 |
| 165 | 6 | 0 | -10.824294 | 2.219751  | -1.465296 |
| 166 | 1 | 0 | -11.809168 | 0.328171  | -1.654182 |

|     |   |   |            |          |           |
|-----|---|---|------------|----------|-----------|
| 167 | 1 | 0 | -11.768939 | 2.768552 | -1.429172 |
| 168 | 1 | 0 | -9.667349  | 4.007578 | -1.261756 |

-----  
Ground to excited state transition electric dipole moments (Au):

| state | X       | Y       | Z      | Dip. S. | Osc.   |
|-------|---------|---------|--------|---------|--------|
| 1     | -4.2732 | -0.8060 | 0.0000 | 18.9095 | 1.3296 |

Ground to excited state transition velocity dipole moments (Au):

| state | X      | Y      | Z       | Dip. S. | Osc.   |
|-------|--------|--------|---------|---------|--------|
| 1     | 0.4669 | 0.0877 | -0.0000 | 0.2257  | 1.4265 |

Ground to excited state transition magnetic dipole moments (Au):

| state | X       | Y      | Z      |
|-------|---------|--------|--------|
| 1     | -0.5607 | 1.8253 | 0.0002 |

Ground to excited state transition velocity quadrupole moments (Au):

| state | XX      | YY      | ZZ      | XY     | XZ     | YZ     |
|-------|---------|---------|---------|--------|--------|--------|
| 1     | -0.0001 | -0.0000 | -0.0000 | 0.0000 | 1.1636 | 0.2869 |

$\langle 0 | \text{del} | b \rangle * \langle b | r x \text{del} | 0 \rangle + \langle 0 | \text{del} | b \rangle * \langle b | \text{del} r + r \text{del} | 0 \rangle$

Rotatory Strengths (R) in cgs ( $10^{*-40}$  erg-esu-cm/Gauss)

| state | XX       | YY        | ZZ        | R(velocity) | E-M Angle |
|-------|----------|-----------|-----------|-------------|-----------|
| 1     | 194.4675 | -428.6337 | -448.4745 | -227.5469   | 96.44     |

$1/2[\langle 0 | r | b \rangle * \langle b | r x \text{del} | 0 \rangle + (\langle 0 | r x \text{del} | b \rangle * \langle b | r | 0 \rangle)]$

Rotatory Strengths (R) in cgs ( $10^{*-40}$  erg-esu-cm/Gauss)

| state | XX         | YY        | ZZ      | R(length) |
|-------|------------|-----------|---------|-----------|
| 1     | -1694.4593 | 1040.4063 | -0.0000 | -218.0177 |

$1/2[\langle 0 | \text{del} | b \rangle * \langle b | r | 0 \rangle + (\langle 0 | r | b \rangle * \langle b | \text{del} | 0 \rangle)]$  (Au)

| state | X       | Y       | Z       | Dip. S. | Osc.(frdel) |
|-------|---------|---------|---------|---------|-------------|
| 1     | -1.9952 | -0.0707 | -0.0000 | 2.0659  | 1.3772      |

-----  
Excitation energies and oscillator strengths:

| Excited State 1: | Singlet-A | 2.8701 eV | 431.99 nm | f=1.3296 | $\langle S^{*2} \rangle = 0.000$ |
|------------------|-----------|-----------|-----------|----------|----------------------------------|
| 352 -> 357       | 0.16199   |           |           |          |                                  |
| 354 -> 357       | 0.27846   |           |           |          |                                  |
| 356 -> 357       | -0.56820  |           |           |          |                                  |
| 356 -> 358       | 0.16364   |           |           |          |                                  |

-----  
Summary of chiroptical properties of (R)-6' (M06-2X/def2-SV(P))

| state | $ \mu_e $<br>/ $10^{-20}$ esu-cm | $ \mu_m $<br>/ $10^{-20}$ erg/Gauss | $\cos\theta$<br>(E-M Angle) | $g_{lum, calcd.}$<br>( $4R/(D+G)$ ) | $E_{ex}$<br>/nm |
|-------|----------------------------------|-------------------------------------|-----------------------------|-------------------------------------|-----------------|
| 1     | 1106                             | 1.771                               | -0.111                      | -0.000713                           | 432             |



**Table S2.** Cartesian coordinates (Å) and transition moments of optimized structure of (R)-**6'** in the lowest-energy excited state ( $S_1$ ) calculated at the CAM-B3LYP/def2-SV(P) level of theory.

| Center Number | Atomic Number | Atomic Type | Coordinates (Angstroms) |           |           |
|---------------|---------------|-------------|-------------------------|-----------|-----------|
|               |               |             | X                       | Y         | Z         |
| 1             | 6             | 0           | -0.056229               | -1.415110 | -1.544511 |
| 2             | 6             | 0           | -1.210224               | -0.652065 | -1.681979 |
| 3             | 6             | 0           | -1.181840               | 0.754644  | -1.693312 |
| 4             | 6             | 0           | 0.056210                | 1.415200  | -1.544406 |
| 5             | 6             | 0           | 1.210212                | 0.652165  | -1.681884 |
| 6             | 6             | 0           | 1.181828                | -0.754546 | -1.693320 |
| 7             | 1             | 0           | -2.181539               | -1.149720 | -1.635925 |
| 8             | 1             | 0           | 2.181524                | 1.149817  | -1.635756 |
| 9             | 6             | 0           | -0.145861               | -2.801927 | -0.953504 |
| 10            | 1             | 0           | 0.562592                | -3.491588 | -1.437864 |
| 11            | 1             | 0           | -1.158188               | -3.197568 | -1.126959 |
| 12            | 6             | 0           | 0.149349                | -2.805463 | 0.607616  |
| 13            | 1             | 0           | 1.158169                | -3.211376 | 0.776560  |
| 14            | 1             | 0           | -0.565258               | -3.491265 | 1.090227  |
| 15            | 6             | 0           | -0.078000               | 1.423948  | 1.209804  |
| 16            | 6             | 0           | -1.215743               | 0.672214  | 1.347804  |
| 17            | 6             | 0           | -1.191734               | -0.760273 | 1.380108  |
| 18            | 6             | 0           | 0.077976                | -1.424065 | 1.209696  |
| 19            | 6             | 0           | 1.215725                | -0.672338 | 1.347706  |
| 20            | 6             | 0           | 1.191718                | 0.760146  | 1.380115  |
| 21            | 1             | 0           | -2.189675               | 1.159790  | 1.260495  |
| 22            | 1             | 0           | 2.189653                | -1.159910 | 1.260323  |
| 23            | 6             | 0           | -0.149391               | 2.805389  | 0.607826  |
| 24            | 6             | 0           | 0.145819                | 2.801975  | -0.953294 |
| 25            | 1             | 0           | -0.562633               | 3.491672  | -1.437606 |
| 26            | 1             | 0           | 1.158146                | 3.197632  | -1.126711 |
| 27            | 1             | 0           | 0.565214                | 3.491159  | 1.090485  |
| 28            | 1             | 0           | -1.158212               | 3.211285  | 0.776808  |
| 29            | 6             | 0           | 2.413115                | -1.478337 | -1.675999 |
| 30            | 6             | 0           | 3.462621                | -2.091429 | -1.662812 |
| 31            | 6             | 0           | -2.413125               | 1.478440  | -1.676011 |
| 32            | 6             | 0           | -3.462618               | 2.091553  | -1.662810 |
| 33            | 6             | 0           | 2.384770                | 1.473928  | 1.416647  |
| 34            | 6             | 0           | 3.448155                | 2.098758  | 1.444698  |
| 35            | 6             | 0           | -2.384779               | -1.474065 | 1.416644  |
| 36            | 6             | 0           | -3.448162               | -2.098903 | 1.444661  |
| 37            | 6             | 0           | 7.116573                | -4.180576 | -1.682138 |
| 38            | 6             | 0           | 5.922995                | -4.888961 | -1.629875 |
| 39            | 6             | 0           | 4.717006                | -4.199726 | -1.622545 |
| 40            | 6             | 0           | 4.702604                | -2.802253 | -1.658488 |
| 41            | 1             | 0           | 8.051104                | -4.741545 | -1.690912 |
| 42            | 1             | 0           | 5.934522                | -5.980869 | -1.602621 |
| 43            | 1             | 0           | 3.766162                | -4.735909 | -1.594377 |
| 44            | 6             | 0           | 7.159314                | -2.780061 | -1.723544 |
| 45            | 6             | 0           | 5.926373                | -2.080742 | -1.700976 |
| 46            | 7             | 0           | 5.895227                | -0.700516 | -1.719459 |
| 47            | 6             | 0           | 8.441188                | -2.041441 | -1.792702 |

|     |   |   |            |           |           |
|-----|---|---|------------|-----------|-----------|
| 48  | 1 | 0 | 4.961566   | -0.301051 | -1.709619 |
| 49  | 5 | 0 | 7.078387   | 0.093522  | -1.766829 |
| 50  | 6 | 0 | 8.420223   | -0.629941 | -1.820917 |
| 51  | 6 | 0 | 9.608846   | 0.130034  | -1.887613 |
| 52  | 7 | 0 | 7.086496   | 1.512628  | -1.761902 |
| 53  | 1 | 0 | 6.239228   | 2.066124  | -1.696493 |
| 54  | 6 | 0 | 9.518953   | 1.606282  | -1.906251 |
| 55  | 6 | 0 | 8.260789   | 2.251869  | -1.834741 |
| 56  | 6 | 0 | 8.191470   | 3.653762  | -1.838056 |
| 57  | 6 | 0 | 9.337432   | 4.426037  | -1.917798 |
| 58  | 6 | 0 | 10.586187  | 3.805666  | -1.994673 |
| 59  | 6 | 0 | 10.659907  | 2.421700  | -1.986913 |
| 60  | 1 | 0 | 7.209421   | 4.131227  | -1.773147 |
| 61  | 1 | 0 | 9.258241   | 5.516540  | -1.922002 |
| 62  | 1 | 0 | 11.499435  | 4.401812  | -2.061407 |
| 63  | 1 | 0 | 11.644173  | 1.955746  | -2.046619 |
| 64  | 6 | 0 | -7.116578  | 4.180687  | -1.682020 |
| 65  | 6 | 0 | -4.702607  | 2.802368  | -1.658459 |
| 66  | 6 | 0 | -4.717010  | 4.199841  | -1.622472 |
| 67  | 6 | 0 | -5.923000  | 4.889075  | -1.629762 |
| 68  | 1 | 0 | -8.051112  | 4.741651  | -1.690749 |
| 69  | 1 | 0 | -3.766166  | 4.736024  | -1.594300 |
| 70  | 1 | 0 | -5.934529  | 5.980982  | -1.602478 |
| 71  | 6 | 0 | -5.926373  | 2.080857  | -1.700964 |
| 72  | 6 | 0 | -7.159315  | 2.780173  | -1.723475 |
| 73  | 6 | 0 | -8.441189  | 2.041552  | -1.792616 |
| 74  | 5 | 0 | -7.078380  | -0.093409 | -1.766858 |
| 75  | 6 | 0 | -8.420221  | 0.630052  | -1.820863 |
| 76  | 6 | 0 | -9.608844  | -0.129925 | -1.887529 |
| 77  | 6 | 0 | -8.260778  | -2.251757 | -1.834801 |
| 78  | 6 | 0 | -9.518947  | -1.606172 | -1.906218 |
| 79  | 6 | 0 | -10.659903 | -2.421591 | -1.986845 |
| 80  | 6 | 0 | -10.586178 | -3.805556 | -1.994670 |
| 81  | 6 | 0 | -9.337416  | -4.425926 | -1.917899 |
| 82  | 6 | 0 | -8.191453  | -3.653650 | -1.838186 |
| 83  | 1 | 0 | -11.644175 | -1.955639 | -2.046469 |
| 84  | 1 | 0 | -11.499428 | -4.401703 | -2.061373 |
| 85  | 1 | 0 | -9.258221  | -5.516429 | -1.922158 |
| 86  | 1 | 0 | -7.209399  | -4.131115 | -1.773359 |
| 87  | 6 | 0 | -4.658235  | -2.802510 | 1.511176  |
| 88  | 6 | 0 | -4.686708  | -4.213434 | 1.462443  |
| 89  | 6 | 0 | -5.888843  | -4.888934 | 1.551685  |
| 90  | 6 | 0 | -7.084316  | -4.180414 | 1.695450  |
| 91  | 1 | 0 | -5.908306  | -5.980823 | 1.516516  |
| 92  | 1 | 0 | -8.014039  | -4.744757 | 1.763672  |
| 93  | 1 | 0 | -3.743299  | -4.753302 | 1.361399  |
| 94  | 6 | 0 | -7.124867  | -2.782131 | 1.750073  |
| 95  | 6 | 0 | -5.894915  | -2.081275 | 1.644657  |
| 96  | 7 | 0 | -5.859552  | -0.711612 | 1.665655  |
| 97  | 6 | 0 | -8.395282  | -2.041341 | 1.910482  |
| 98  | 1 | 0 | -4.928293  | -0.312766 | 1.580722  |
| 99  | 6 | 0 | -8.370921  | -0.629461 | 1.936202  |
| 100 | 5 | 0 | -7.038676  | 0.090758  | 1.788387  |
| 101 | 7 | 0 | -7.037705  | 1.507270  | 1.779432  |

|     |   |   |            |           |           |
|-----|---|---|------------|-----------|-----------|
| 102 | 6 | 0 | -9.550120  | 0.133632  | 2.082017  |
| 103 | 1 | 0 | -6.195823  | 2.056976  | 1.645164  |
| 104 | 6 | 0 | -8.202033  | 2.250589  | 1.927112  |
| 105 | 6 | 0 | -9.454344  | 1.608622  | 2.087862  |
| 106 | 6 | 0 | -10.584761 | 2.428741  | 2.241505  |
| 107 | 6 | 0 | -10.505645 | 3.812050  | 2.236017  |
| 108 | 6 | 0 | -9.262942  | 4.428420  | 2.070433  |
| 109 | 6 | 0 | -8.127576  | 3.652437  | 1.917518  |
| 110 | 1 | 0 | -11.564178 | 1.966686  | 2.370410  |
| 111 | 1 | 0 | -11.410271 | 4.411957  | 2.360933  |
| 112 | 1 | 0 | -9.181049  | 5.518648  | 2.062569  |
| 113 | 1 | 0 | -7.150827  | 4.125941  | 1.782508  |
| 114 | 6 | 0 | 7.084280   | 4.180305  | 1.695603  |
| 115 | 6 | 0 | 4.658219   | 2.802381  | 1.511244  |
| 116 | 6 | 0 | 4.686676   | 4.213306  | 1.462568  |
| 117 | 6 | 0 | 5.888802   | 4.888816  | 1.551853  |
| 118 | 1 | 0 | 8.013994   | 4.744657  | 1.763873  |
| 119 | 1 | 0 | 3.743261   | 4.753167  | 1.361536  |
| 120 | 1 | 0 | 5.908253   | 5.980706  | 1.516726  |
| 121 | 6 | 0 | 5.894907   | 2.081153  | 1.644700  |
| 122 | 6 | 0 | 7.124849   | 2.782019  | 1.750162  |
| 123 | 6 | 0 | 8.395272   | 2.041239  | 1.910557  |
| 124 | 7 | 0 | 5.859564   | 0.711487  | 1.665640  |
| 125 | 1 | 0 | 4.928314   | 0.312631  | 1.580658  |
| 126 | 5 | 0 | 7.038692   | -0.090871 | 1.788374  |
| 127 | 6 | 0 | 8.370925   | 0.629359  | 1.936257  |
| 128 | 6 | 0 | 9.550129   | -0.133724 | 2.082071  |
| 129 | 7 | 0 | 7.037744   | -1.507383 | 1.779347  |
| 130 | 1 | 0 | 6.195875   | -2.057093 | 1.645007  |
| 131 | 6 | 0 | 9.454368   | -1.608715 | 2.087891  |
| 132 | 6 | 0 | 8.202073   | -2.250692 | 1.927054  |
| 133 | 6 | 0 | 8.127637   | -3.652541 | 1.917403  |
| 134 | 6 | 0 | 9.263004   | -4.428514 | 2.070366  |
| 135 | 6 | 0 | 10.505687  | -3.812133 | 2.236061  |
| 136 | 6 | 0 | 10.584784  | -2.428823 | 2.241596  |
| 137 | 1 | 0 | 7.150904   | -4.126054 | 1.782308  |
| 138 | 1 | 0 | 9.181127   | -5.518742 | 2.062458  |
| 139 | 1 | 0 | 11.410311  | -4.412032 | 2.361030  |
| 140 | 1 | 0 | 11.564184  | -1.966759 | 2.370597  |
| 141 | 7 | 0 | -5.895221  | 0.700631  | -1.719513 |
| 142 | 1 | 0 | -4.961559  | 0.301170  | -1.709709 |
| 143 | 7 | 0 | -7.086484  | -1.512515 | -1.761986 |
| 144 | 1 | 0 | -6.239212  | -2.066011 | -1.696637 |
| 145 | 6 | 0 | -9.681942  | 2.688115  | -1.830973 |
| 146 | 6 | 0 | -10.829980 | 0.554501  | -1.926427 |
| 147 | 6 | 0 | -10.854408 | 1.943885  | -1.897474 |
| 148 | 1 | 0 | -11.776620 | 0.015547  | -1.974984 |
| 149 | 1 | 0 | -11.816169 | 2.463569  | -1.924654 |
| 150 | 1 | 0 | -9.755661  | 3.775411  | -1.805639 |
| 151 | 6 | 0 | -10.767317 | -0.548419 | 2.207148  |
| 152 | 6 | 0 | -9.631940  | -2.685088 | 2.036049  |
| 153 | 6 | 0 | -10.795508 | -1.937933 | 2.183013  |
| 154 | 1 | 0 | -11.707492 | -0.007699 | 2.319746  |
| 155 | 1 | 0 | -9.708978  | -3.772279 | 2.017099  |

|     |   |   |            |           |           |
|-----|---|---|------------|-----------|-----------|
| 156 | 1 | 0 | -11.753943 | -2.455750 | 2.278040  |
| 157 | 6 | 0 | 9.631924   | 2.684996  | 2.036131  |
| 158 | 6 | 0 | 10.767319  | 0.548336  | 2.207215  |
| 159 | 6 | 0 | 10.795499  | 1.937851  | 2.183091  |
| 160 | 1 | 0 | 11.707499  | 0.007623  | 2.319809  |
| 161 | 1 | 0 | 11.753928  | 2.455675  | 2.278127  |
| 162 | 1 | 0 | 9.708953   | 3.772187  | 2.017176  |
| 163 | 6 | 0 | 10.829978  | -0.554394 | -1.926581 |
| 164 | 6 | 0 | 9.681939   | -2.688007 | -1.831111 |
| 165 | 6 | 0 | 10.854404  | -1.943778 | -1.897651 |
| 166 | 1 | 0 | 11.776617  | -0.015442 | -1.975180 |
| 167 | 1 | 0 | 11.816163  | -2.463465 | -1.924889 |
| 168 | 1 | 0 | 9.755657   | -3.775302 | -1.805789 |

-----  
Ground to excited state transition electric dipole moments (Au):

| state | X       | Y       | Z       | Dip. S. | Osc.   |
|-------|---------|---------|---------|---------|--------|
| 1     | -4.3348 | -0.8721 | -0.0000 | 19.5509 | 1.3805 |
| 2     | -3.5611 | 0.5691  | 0.0000  | 13.0056 | 1.0453 |

Ground to excited state transition velocity dipole moments (Au):

| state | X      | Y       | Z       | Dip. S. | Osc.   |
|-------|--------|---------|---------|---------|--------|
| 1     | 0.4559 | 0.0912  | 0.0000  | 0.2162  | 1.3606 |
| 2     | 0.4273 | -0.0678 | -0.0000 | 0.1872  | 1.0349 |

Ground to excited state transition magnetic dipole moments (Au):

| state | X       | Y       | Z       |
|-------|---------|---------|---------|
| 1     | -0.3536 | 1.7957  | 0.0002  |
| 2     | -0.5716 | -2.0673 | -0.0001 |

Ground to excited state transition velocity quadrupole moments (Au):

| state | XX      | YY      | ZZ     | XY      | XZ      | YZ     |
|-------|---------|---------|--------|---------|---------|--------|
| 1     | -0.0000 | -0.0000 | 0.0000 | -0.0001 | 1.6181  | 0.4193 |
| 2     | 0.0001  | -0.0000 | 0.0000 | 0.0000  | -1.5522 | 0.3825 |

$\langle 0 | \text{del} | b \rangle * \langle b | \text{rxdel} | 0 \rangle + \langle 0 | \text{del} | b \rangle * \langle b | \text{delr+rdel} | 0 \rangle$

Rotatory Strengths (R) in cgs ( $10^{*-40}$  erg-esu-cm/Gauss)

| state | XX       | YY        | ZZ        | R(velocity) | E-M Angle |
|-------|----------|-----------|-----------|-------------|-----------|
| 1     | 54.0859  | 100.0064  | -136.4035 | 5.8963      | 89.82     |
| 2     | 102.3753 | -236.9902 | -476.2458 | -203.6202   | 96.44     |

$1/2[\langle 0 | r | b \rangle * \langle b | \text{rxdel} | 0 \rangle + (\langle 0 | \text{rxdel} | b \rangle * \langle b | r | 0 \rangle)]$

Rotatory Strengths (R) in cgs ( $10^{*-40}$  erg-esu-cm/Gauss)

| state | XX         | YY        | ZZ     | R(length) |
|-------|------------|-----------|--------|-----------|
| 1     | -1083.7985 | 1107.4356 | 0.0000 | 7.8791    |
| 2     | -1439.3986 | 831.9950  | 0.0000 | -202.4679 |

$1/2[\langle 0 | \text{del} | b \rangle * \langle b | r | 0 \rangle + (\langle 0 | r | b \rangle * \langle b | \text{del} | 0 \rangle)]$  (Au)

| state | X       | Y       | Z       | Dip. S. | Osc.(frdel) |
|-------|---------|---------|---------|---------|-------------|
| 1     | -1.9762 | -0.0796 | -0.0000 | 2.0558  | 1.3705      |
| 2     | -1.5216 | -0.0386 | -0.0000 | 1.5601  | 1.0401      |

-----  
 Excitation energies and oscillator strengths:  
 -----

Excited State 1: Singlet-A 2.8822 eV 430.17 nm f=1.3805 <S\*\*2>=0.000  
 352 -> 357 0.18038  
 354 -> 357 0.21224  
 356 -> 357 0.58504  
 356 -> 358 -0.16226

Excited State 2: Singlet-A 3.2804 eV 377.95 nm f=1.0453 <S\*\*2>=0.000  
 351 -> 357 0.30778  
 351 -> 358 0.19165  
 352 -> 357 0.13598  
 352 -> 358 0.12107  
 354 -> 357 -0.32466  
 354 -> 358 -0.21335  
 356 -> 357 0.22140  
 356 -> 358 0.27781

Summary of chiroptical properties of (R)-6' (CAM-B3LYP/def2-SV(P))

| state | $ \mu_e $<br>/10 <sup>-20</sup> esu-cm | $ \mu_m $<br>/10 <sup>-20</sup> erg/Gauss | cos $\theta$<br>(E-M Angle) | $g_{lum, calcd.}$<br>(4R/(D+G)) | E <sub>ex</sub><br>/nm |
|-------|----------------------------------------|-------------------------------------------|-----------------------------|---------------------------------|------------------------|
| 1     | 1125                                   | 1.697                                     | 0.004                       | 0.000025                        | 430                    |
| 2     | 917                                    | 1.989                                     | -0.111                      | -0.000963                       | 378                    |

**Table S3.** Cartesian coordinates (Å) and transition moments of optimized structure of (R)-6' in the lowest-energy excited state (S<sub>1</sub>) calculated at the CAM-B3LYP-D3(BJ)/def2-SV(P) level of theory.

| Center Number | Atomic Number | Atomic Type | Coordinates (Angstroms) |           |           |
|---------------|---------------|-------------|-------------------------|-----------|-----------|
|               |               |             | X                       | Y         | Z         |
| 1             | 6             | 0           | -0.060218               | -1.415137 | -1.457782 |
| 2             | 6             | 0           | -1.213233               | -0.651903 | -1.590963 |
| 3             | 6             | 0           | -1.178236               | 0.753859  | -1.590900 |
| 4             | 6             | 0           | 0.060223                | 1.414945  | -1.457756 |
| 5             | 6             | 0           | 1.213237                | 0.651712  | -1.590947 |
| 6             | 6             | 0           | 1.178241                | -0.754049 | -1.590912 |
| 7             | 1             | 0           | -2.185530               | -1.145974 | -1.537666 |
| 8             | 1             | 0           | 2.185533                | 1.145782  | -1.537620 |
| 9             | 6             | 0           | -0.149039               | -2.802460 | -0.870888 |
| 10            | 1             | 0           | 0.553748                | -3.492564 | -1.362364 |
| 11            | 1             | 0           | -1.164618               | -3.193014 | -1.034989 |
| 12            | 6             | 0           | 0.160275                | -2.805837 | 0.685144  |
| 13            | 1             | 0           | 1.173380                | -3.203608 | 0.845858  |
| 14            | 1             | 0           | -0.547226               | -3.493920 | 1.174427  |
| 15            | 6             | 0           | -0.084645               | 1.423152  | 1.280660  |
| 16            | 6             | 0           | -1.219817               | 0.668920  | 1.419166  |

|    |   |   |           |           |           |
|----|---|---|-----------|-----------|-----------|
| 17 | 6 | 0 | -1.187049 | -0.762244 | 1.426652  |
| 18 | 6 | 0 | 0.084643  | -1.423408 | 1.280636  |
| 19 | 6 | 0 | 1.219810  | -0.669179 | 1.419204  |
| 20 | 6 | 0 | 1.187042  | 0.761986  | 1.426718  |
| 21 | 1 | 0 | -2.195336 | 1.152448  | 1.334171  |
| 22 | 1 | 0 | 2.195332  | -1.152707 | 1.334244  |
| 23 | 6 | 0 | -0.160258 | 2.805596  | 0.685196  |
| 24 | 6 | 0 | 0.149052  | 2.802257  | -0.870835 |
| 25 | 1 | 0 | -0.553726 | 3.492378  | -1.362299 |
| 26 | 1 | 0 | 1.164636  | 3.192801  | -1.034922 |
| 27 | 1 | 0 | 0.547248  | 3.493664  | 1.174496  |
| 28 | 1 | 0 | -1.173359 | 3.203373  | 0.845919  |
| 29 | 6 | 0 | 2.403416  | -1.479615 | -1.521668 |
| 30 | 6 | 0 | 3.442186  | -2.103333 | -1.438778 |
| 31 | 6 | 0 | -2.403412 | 1.479429  | -1.521729 |
| 32 | 6 | 0 | -3.442172 | 2.103186  | -1.438988 |
| 33 | 6 | 0 | 2.375511  | 1.479582  | 1.386851  |
| 34 | 6 | 0 | 3.429218  | 2.114961  | 1.318110  |
| 35 | 6 | 0 | -2.375517 | -1.479839 | 1.386702  |
| 36 | 6 | 0 | -3.429206 | -2.115237 | 1.317883  |
| 37 | 6 | 0 | 7.068091  | -4.224310 | -1.276607 |
| 38 | 6 | 0 | 5.867851  | -4.915201 | -1.173988 |
| 39 | 6 | 0 | 4.668999  | -4.215394 | -1.221549 |
| 40 | 6 | 0 | 4.670619  | -2.825016 | -1.363426 |
| 41 | 1 | 0 | 7.997676  | -4.791130 | -1.237249 |
| 42 | 1 | 0 | 5.868654  | -6.001822 | -1.064620 |
| 43 | 1 | 0 | 3.711798  | -4.736694 | -1.157178 |
| 44 | 6 | 0 | 7.124451  | -2.831677 | -1.417813 |
| 45 | 6 | 0 | 5.900155  | -2.119938 | -1.450037 |
| 46 | 7 | 0 | 5.880670  | -0.745110 | -1.560208 |
| 47 | 6 | 0 | 8.412612  | -2.113103 | -1.514590 |
| 48 | 1 | 0 | 4.951249  | -0.336382 | -1.578099 |
| 49 | 5 | 0 | 7.072318  | 0.032255  | -1.629426 |
| 50 | 6 | 0 | 8.405764  | -0.705766 | -1.617501 |
| 51 | 6 | 0 | 9.602884  | 0.037294  | -1.687133 |
| 52 | 7 | 0 | 7.094692  | 1.448562  | -1.692284 |
| 53 | 1 | 0 | 6.252849  | 2.012903  | -1.659146 |
| 54 | 6 | 0 | 9.529794  | 1.509899  | -1.770262 |
| 55 | 6 | 0 | 8.278202  | 2.170303  | -1.762694 |
| 56 | 6 | 0 | 8.224775  | 3.570876  | -1.816788 |
| 57 | 6 | 0 | 9.381965  | 4.327403  | -1.877281 |
| 58 | 6 | 0 | 10.625164 | 3.691606  | -1.890653 |
| 59 | 6 | 0 | 10.682047 | 2.308294  | -1.839175 |
| 60 | 1 | 0 | 7.246816  | 4.059138  | -1.799800 |
| 61 | 1 | 0 | 9.315836  | 5.417961  | -1.916818 |
| 62 | 1 | 0 | 11.546979 | 4.275665  | -1.941749 |
| 63 | 1 | 0 | 11.661285 | 1.829121  | -1.846559 |
| 64 | 6 | 0 | -7.067926 | 4.224393  | -1.276411 |
| 65 | 6 | 0 | -4.670555 | 2.824937  | -1.363457 |
| 66 | 6 | 0 | -4.668831 | 4.215307  | -1.221496 |
| 67 | 6 | 0 | -5.867632 | 4.915194  | -1.173813 |
| 68 | 1 | 0 | -7.997469 | 4.791275  | -1.236959 |
| 69 | 1 | 0 | -3.711591 | 4.736538  | -1.157169 |
| 70 | 1 | 0 | -5.868353 | 6.001809  | -1.064381 |

|     |   |   |            |           |           |
|-----|---|---|------------|-----------|-----------|
| 71  | 6 | 0 | -5.900145  | 2.119950  | -1.450029 |
| 72  | 6 | 0 | -7.124389  | 2.831773  | -1.417706 |
| 73  | 6 | 0 | -8.412604  | 2.113299  | -1.514488 |
| 74  | 5 | 0 | -7.072471  | -0.032153 | -1.629424 |
| 75  | 6 | 0 | -8.405863  | 0.705965  | -1.617436 |
| 76  | 6 | 0 | -9.603040  | -0.037005 | -1.687052 |
| 77  | 6 | 0 | -8.278520  | -2.170113 | -1.762631 |
| 78  | 6 | 0 | -9.530063  | -1.509616 | -1.770166 |
| 79  | 6 | 0 | -10.682378 | -2.307929 | -1.839011 |
| 80  | 6 | 0 | -10.625600 | -3.691246 | -1.890459 |
| 81  | 6 | 0 | -9.382447  | -4.327135 | -1.877125 |
| 82  | 6 | 0 | -8.225199  | -3.570692 | -1.816696 |
| 83  | 1 | 0 | -11.661581 | -1.828684 | -1.846350 |
| 84  | 1 | 0 | -11.547459 | -4.275239 | -1.941499 |
| 85  | 1 | 0 | -9.316400  | -5.417699 | -1.916643 |
| 86  | 1 | 0 | -7.247275  | -4.059027 | -1.799733 |
| 87  | 6 | 0 | -4.632653  | -2.828241 | 1.280573  |
| 88  | 6 | 0 | -4.648643  | -4.231443 | 1.128541  |
| 89  | 6 | 0 | -5.848755  | -4.916331 | 1.127458  |
| 90  | 6 | 0 | -7.052427  | -4.224411 | 1.279879  |
| 91  | 1 | 0 | -5.860311  | -6.002704 | 1.013001  |
| 92  | 1 | 0 | -7.981267  | -4.793188 | 1.271757  |
| 93  | 1 | 0 | -3.698026  | -4.757176 | 1.022118  |
| 94  | 6 | 0 | -7.103012  | -2.833997 | 1.428913  |
| 95  | 6 | 0 | -5.876277  | -2.122354 | 1.416645  |
| 96  | 7 | 0 | -5.848094  | -0.758105 | 1.528904  |
| 97  | 6 | 0 | -8.382369  | -2.111671 | 1.574789  |
| 98  | 1 | 0 | -4.917150  | -0.350749 | 1.502464  |
| 99  | 6 | 0 | -8.368212  | -0.704060 | 1.678914  |
| 100 | 5 | 0 | -7.036797  | 0.029086  | 1.640680  |
| 101 | 7 | 0 | -7.045360  | 1.442934  | 1.704654  |
| 102 | 6 | 0 | -9.558902  | 0.043600  | 1.791197  |
| 103 | 1 | 0 | -6.203160  | 2.003056  | 1.629230  |
| 104 | 6 | 0 | -8.222007  | 2.170159  | 1.816630  |
| 105 | 6 | 0 | -9.475609  | 1.514830  | 1.870530  |
| 106 | 6 | 0 | -10.620942 | 2.319317  | 1.979823  |
| 107 | 6 | 0 | -10.554755 | 3.701908  | 2.026920  |
| 108 | 6 | 0 | -9.309460  | 4.332323  | 1.967531  |
| 109 | 6 | 0 | -8.159173  | 3.570704  | 1.866770  |
| 110 | 1 | 0 | -11.601602 | 1.845055  | 2.022846  |
| 111 | 1 | 0 | -11.471131 | 4.290831  | 2.109858  |
| 112 | 1 | 0 | -9.237343  | 5.422608  | 2.002483  |
| 113 | 1 | 0 | -7.180153  | 4.053994  | 1.812303  |
| 114 | 6 | 0 | 7.052331   | 4.224324  | 1.280133  |
| 115 | 6 | 0 | 4.632627   | 2.828028  | 1.280813  |
| 116 | 6 | 0 | 4.648541   | 4.231241  | 1.128870  |
| 117 | 6 | 0 | 5.848617   | 4.916191  | 1.127801  |
| 118 | 1 | 0 | 7.981140   | 4.793151  | 1.272024  |
| 119 | 1 | 0 | 3.697895   | 4.756935  | 1.022517  |
| 120 | 1 | 0 | 5.860112   | 6.002574  | 1.013423  |
| 121 | 6 | 0 | 5.876297   | 2.122194  | 1.416798  |
| 122 | 6 | 0 | 7.102995   | 2.833903  | 1.429064  |
| 123 | 6 | 0 | 8.382394   | 2.111636  | 1.574852  |
| 124 | 7 | 0 | 5.848191   | 0.757939  | 1.528997  |

|     |   |   |            |           |           |
|-----|---|---|------------|-----------|-----------|
| 125 | 1 | 0 | 4.917267   | 0.350535  | 1.502590  |
| 126 | 5 | 0 | 7.036939   | -0.029195 | 1.640718  |
| 127 | 6 | 0 | 8.368317   | 0.704020  | 1.678926  |
| 128 | 6 | 0 | 9.559050   | -0.043581 | 1.791138  |
| 129 | 7 | 0 | 7.045576   | -1.443043 | 1.704684  |
| 130 | 1 | 0 | 6.203403   | -2.003208 | 1.629282  |
| 131 | 6 | 0 | 9.475836   | -1.514815 | 1.870471  |
| 132 | 6 | 0 | 8.222264   | -2.170207 | 1.816620  |
| 133 | 6 | 0 | 8.159504   | -3.570755 | 1.866780  |
| 134 | 6 | 0 | 9.309832   | -4.332315 | 1.967515  |
| 135 | 6 | 0 | 10.555097  | -3.701836 | 2.026863  |
| 136 | 6 | 0 | 10.621213  | -2.319242 | 1.979746  |
| 137 | 1 | 0 | 7.180507   | -4.054096 | 1.812346  |
| 138 | 1 | 0 | 9.237772   | -5.422603 | 2.002478  |
| 139 | 1 | 0 | 11.471505  | -4.290711 | 2.109792  |
| 140 | 1 | 0 | 11.601849  | -1.844928 | 2.022757  |
| 141 | 7 | 0 | -5.880762  | 0.745125  | -1.560254 |
| 142 | 1 | 0 | -4.951372  | 0.336331  | -1.578208 |
| 143 | 7 | 0 | -7.094953  | -1.448459 | -1.692273 |
| 144 | 1 | 0 | -6.253151  | -2.012862 | -1.659169 |
| 145 | 6 | 0 | -9.644878  | 2.773759  | -1.490153 |
| 146 | 6 | 0 | -10.817056 | 0.659232  | -1.654949 |
| 147 | 6 | 0 | -10.826177 | 2.045230  | -1.559654 |
| 148 | 1 | 0 | -11.769426 | 0.130524  | -1.696081 |
| 149 | 1 | 0 | -11.782209 | 2.574471  | -1.528413 |
| 150 | 1 | 0 | -9.705086  | 3.857826  | -1.400224 |
| 151 | 6 | 0 | -10.776224 | -0.648478 | 1.802273  |
| 152 | 6 | 0 | -9.617405  | -2.767501 | 1.594351  |
| 153 | 6 | 0 | -10.792911 | -2.034444 | 1.706653  |
| 154 | 1 | 0 | -11.724769 | -0.116613 | 1.877199  |
| 155 | 1 | 0 | -9.684383  | -3.851218 | 1.505141  |
| 156 | 1 | 0 | -11.751204 | -2.560444 | 1.708843  |
| 157 | 6 | 0 | 9.617397   | 2.767528  | 1.594379  |
| 158 | 6 | 0 | 10.776338  | 0.648560  | 1.802169  |
| 159 | 6 | 0 | 10.792948  | 2.034529  | 1.706590  |
| 160 | 1 | 0 | 11.724914  | 0.116741  | 1.877036  |
| 161 | 1 | 0 | 11.751214  | 2.560579  | 1.708749  |
| 162 | 1 | 0 | 9.684315   | 3.851252  | 1.505199  |
| 163 | 6 | 0 | 10.816953  | -0.658850 | -1.655049 |
| 164 | 6 | 0 | 9.644937   | -2.773469 | -1.490282 |
| 165 | 6 | 0 | 10.826180  | -2.044849 | -1.559772 |
| 166 | 1 | 0 | 11.769282  | -0.130070 | -1.696184 |
| 167 | 1 | 0 | 11.782252  | -2.574018 | -1.528547 |
| 168 | 1 | 0 | 9.705229   | -3.857533 | -1.400371 |

-----  
Ground to excited state transition electric dipole moments (Au):

| state | X       | Y       | Z       | Dip. S. | Osc.   |
|-------|---------|---------|---------|---------|--------|
| 1     | -4.2775 | -0.8492 | -0.0000 | 19.0177 | 1.3426 |
| 2     | -3.4389 | 0.5677  | 0.0000  | 12.1484 | 0.9696 |



Ground to excited state transition velocity dipole moments (Au):

| state | X      | Y       | Z       | Dip. S. | Osc.   |
|-------|--------|---------|---------|---------|--------|
| 1     | 0.4494 | 0.0887  | 0.0000  | 0.2098  | 1.3208 |
| 2     | 0.4094 | -0.0670 | -0.0000 | 0.1721  | 0.9583 |

Ground to excited state transition magnetic dipole moments (Au):

| state | X       | Y       | Z      |
|-------|---------|---------|--------|
| 1     | -0.4936 | 1.8472  | 0.0001 |
| 2     | -0.5891 | -1.9763 | 0.0001 |

Ground to excited state transition velocity quadrupole moments (Au):

| state | XX      | YY      | ZZ      | XY      | XZ      | YZ     |
|-------|---------|---------|---------|---------|---------|--------|
| 1     | 0.0001  | -0.0000 | 0.0000  | -0.0000 | 1.2536  | 0.3217 |
| 2     | -0.0000 | -0.0000 | -0.0000 | 0.0001  | -1.2439 | 0.2935 |

$\langle 0 | \text{del} | b \rangle * \langle b | r x \text{del} | 0 \rangle + \langle 0 | \text{del} | b \rangle * \langle b | \text{del} r + r \text{del} | 0 \rangle$   
Rotatory Strengths (R) in cgs ( $10^{*-40}$  erg-esu-cm/Gauss)

| state | XX       | YY        | ZZ        | R(velocity) | E-M Angle |
|-------|----------|-----------|-----------|-------------|-----------|
| 1     | 175.8249 | -257.8060 | -304.7649 | -128.9154   | 93.79     |
| 2     | 144.9696 | -357.3841 | -429.8890 | -214.1011   | 97.30     |

$1/2[\langle 0 | r | b \rangle * \langle b | r x \text{del} | 0 \rangle + (\langle 0 | r x \text{del} | b \rangle * \langle b | r | 0 \rangle)]$   
Rotatory Strengths (R) in cgs ( $10^{*-40}$  erg-esu-cm/Gauss)

| state | XX         | YY        | ZZ      | R(length) |
|-------|------------|-----------|---------|-----------|
| 1     | -1492.9938 | 1109.2624 | 0.0000  | -127.9105 |
| 2     | -1432.6739 | 793.3931  | -0.0000 | -213.0936 |

$1/2[\langle 0 | \text{del} | b \rangle * \langle b | r | 0 \rangle + (\langle 0 | r | b \rangle * \langle b | \text{del} | 0 \rangle)]$  (Au)

| state | X       | Y       | Z       | Dip. S. | Osc.(frdel) |
|-------|---------|---------|---------|---------|-------------|
| 1     | -1.9222 | -0.0753 | -0.0000 | 1.9975  | 1.3317      |
| 2     | -1.4078 | -0.0380 | -0.0000 | 1.4459  | 0.9639      |

-----  
Excitation energies and oscillator strengths:  
-----

Excited State 1: Singlet-A 2.8816 eV 430.26 nm f=1.3426  $\langle S^{*2} \rangle = 0.000$

|            |          |
|------------|----------|
| 352 -> 357 | -0.13727 |
| 354 -> 357 | 0.30319  |
| 356 -> 357 | 0.55195  |
| 356 -> 358 | -0.16533 |

Excited State 2: Singlet-A 3.2577 eV 380.59 nm f=0.9696  $\langle S^{*2} \rangle = 0.000$

|            |          |
|------------|----------|
| 351 -> 357 | -0.28324 |
| 351 -> 358 | -0.16491 |
| 352 -> 357 | -0.22298 |
| 352 -> 358 | -0.18410 |
| 354 -> 357 | -0.25191 |
| 354 -> 358 | -0.13510 |
| 356 -> 357 | 0.25540  |
| 356 -> 358 | 0.32068  |

Summary of chiroptical properties of (R)-6' (CAM-B3LYP-D3(BJ)/def2-SV(P))

| state | $ \mu_e $<br>/ $10^{-20}$ esu-cm | $ \mu_m $<br>/ $10^{-20}$ erg/Gauss | $\cos\theta$<br>(E-M Angle) | $g_{lum, calcd.}$<br>(4R/(D+G)) | $E_{ex}$<br>/nm |
|-------|----------------------------------|-------------------------------------|-----------------------------|---------------------------------|-----------------|
| 1     | 1109                             | 1.773                               | -0.065                      | -0.000416                       | 430             |
| 2     | 887                              | 1.913                               | -0.126                      | -0.001090                       | 381             |

**Table S4.** Cartesian coordinates (Å) and transition moments of optimized structure of (R)-6' in the lowest-energy excited state ( $S_1$ ) calculated at the  $\omega$ B97XD/def2-SV(P) level of theory.

| Center Number | Atomic Number | Atomic Type | Coordinates (Angstroms) |           |           |
|---------------|---------------|-------------|-------------------------|-----------|-----------|
|               |               |             | X                       | Y         | Z         |
| 1             | 6             | 0           | -0.062984               | -1.416820 | -1.456158 |
| 2             | 6             | 0           | -1.216066               | -0.649938 | -1.592985 |
| 3             | 6             | 0           | -1.176824               | 0.756161  | -1.590002 |
| 4             | 6             | 0           | 0.062950                | 1.416932  | -1.456142 |
| 5             | 6             | 0           | 1.216031                | 0.650056  | -1.592972 |
| 6             | 6             | 0           | 1.176791                | -0.756043 | -1.589995 |
| 7             | 1             | 0           | -2.191292               | -1.141753 | -1.539751 |
| 8             | 1             | 0           | 2.191255                | 1.141873  | -1.539735 |
| 9             | 6             | 0           | -0.155189               | -2.804015 | -0.864076 |
| 10            | 1             | 0           | 0.538298                | -3.501312 | -1.361796 |
| 11            | 1             | 0           | -1.176013               | -3.188886 | -1.017778 |
| 12            | 6             | 0           | 0.168699                | -2.807434 | 0.689811  |
| 13            | 1             | 0           | 1.187249                | -3.199043 | 0.840298  |
| 14            | 1             | 0           | -0.529423               | -3.503108 | 1.185067  |
| 15            | 6             | 0           | -0.089288               | 1.425486  | 1.290730  |
| 16            | 6             | 0           | -1.223821               | 0.667464  | 1.433704  |
| 17            | 6             | 0           | -1.185193               | -0.764947 | 1.437753  |
| 18            | 6             | 0           | 0.089238                | -1.425404 | 1.290708  |
| 19            | 6             | 0           | 1.223768                | -0.667387 | 1.433712  |
| 20            | 6             | 0           | 1.185141                | 0.765023  | 1.437770  |
| 21            | 1             | 0           | -2.202705               | 1.147742  | 1.348392  |
| 22            | 1             | 0           | 2.202654                | -1.147662 | 1.348416  |
| 23            | 6             | 0           | -0.168745               | 2.807523  | 0.689850  |
| 24            | 6             | 0           | 0.155151                | 2.804119  | -0.864037 |
| 25            | 1             | 0           | -0.538335               | 3.501423  | -1.361751 |
| 26            | 1             | 0           | 1.175974                | 3.188992  | -1.017731 |
| 27            | 1             | 0           | 0.529381                | 3.503182  | 1.185119  |
| 28            | 1             | 0           | -1.187293               | 3.199138  | 0.840342  |
| 29            | 6             | 0           | 2.402602                | -1.484041 | -1.508693 |
| 30            | 6             | 0           | 3.440178                | -2.111395 | -1.404945 |
| 31            | 6             | 0           | -2.402629               | 1.484166  | -1.508692 |
| 32            | 6             | 0           | -3.440177               | 2.111563  | -1.404932 |
| 33            | 6             | 0           | 2.372614                | 1.485465  | 1.384888  |
| 34            | 6             | 0           | 3.425639                | 2.125100  | 1.293394  |
| 35            | 6             | 0           | -2.372661               | -1.485396 | 1.384866  |
| 36            | 6             | 0           | -3.425665               | -2.125069 | 1.293390  |

|    |   |   |            |           |           |
|----|---|---|------------|-----------|-----------|
| 37 | 6 | 0 | 7.050224   | -4.260509 | -1.187759 |
| 38 | 6 | 0 | 5.842216   | -4.939422 | -1.075588 |
| 39 | 6 | 0 | 4.649142   | -4.228682 | -1.141778 |
| 40 | 6 | 0 | 4.665636   | -2.839729 | -1.309364 |
| 41 | 1 | 0 | 7.973818   | -4.838274 | -1.133284 |
| 42 | 1 | 0 | 5.832496   | -6.024338 | -0.945597 |
| 43 | 1 | 0 | 3.686024   | -4.740427 | -1.072426 |
| 44 | 6 | 0 | 7.121577   | -2.869814 | -1.355105 |
| 45 | 6 | 0 | 5.902807   | -2.145314 | -1.402495 |
| 46 | 7 | 0 | 5.896953   | -0.771907 | -1.532888 |
| 47 | 6 | 0 | 8.420013   | -2.166067 | -1.460589 |
| 48 | 1 | 0 | 4.973647   | -0.350260 | -1.559761 |
| 49 | 5 | 0 | 7.098989   | -0.005404 | -1.603631 |
| 50 | 6 | 0 | 8.428629   | -0.758645 | -1.578169 |
| 51 | 6 | 0 | 9.633973   | -0.026989 | -1.651234 |
| 52 | 7 | 0 | 7.136082   | 1.412038  | -1.682585 |
| 53 | 1 | 0 | 6.299342   | 1.983835  | -1.653252 |
| 54 | 6 | 0 | 9.574439   | 1.447897  | -1.746644 |
| 55 | 6 | 0 | 8.327739   | 2.121016  | -1.752385 |
| 56 | 6 | 0 | 8.287857   | 3.523657  | -1.818551 |
| 57 | 6 | 0 | 9.453978   | 4.269493  | -1.874409 |
| 58 | 6 | 0 | 10.692323  | 3.621437  | -1.874365 |
| 59 | 6 | 0 | 10.735702  | 2.236416  | -1.813681 |
| 60 | 1 | 0 | 7.314496   | 4.023669  | -1.812903 |
| 61 | 1 | 0 | 9.398092   | 5.360967  | -1.922550 |
| 62 | 1 | 0 | 11.620592  | 4.196682  | -1.922699 |
| 63 | 1 | 0 | 11.712925  | 1.750379  | -1.810759 |
| 64 | 6 | 0 | -7.050322  | 4.260535  | -1.187971 |
| 65 | 6 | 0 | -4.665671  | 2.839849  | -1.309427 |
| 66 | 6 | 0 | -4.649240  | 4.228812  | -1.141932 |
| 67 | 6 | 0 | -5.842345  | 4.939507  | -1.075830 |
| 68 | 1 | 0 | -7.973940  | 4.838275  | -1.133610 |
| 69 | 1 | 0 | -3.686145  | 4.740603  | -1.072588 |
| 70 | 1 | 0 | -5.832673  | 6.024436  | -0.945944 |
| 71 | 6 | 0 | -5.902811  | 2.145372  | -1.402528 |
| 72 | 6 | 0 | -7.121615  | 2.869823  | -1.355185 |
| 73 | 6 | 0 | -8.420020  | 2.166011  | -1.460595 |
| 74 | 5 | 0 | -7.098901  | 0.005410  | -1.603679 |
| 75 | 6 | 0 | -8.428573  | 0.758595  | -1.578263 |
| 76 | 6 | 0 | -9.633886  | 0.026881  | -1.651289 |
| 77 | 6 | 0 | -8.327552  | -2.121065 | -1.752434 |
| 78 | 6 | 0 | -9.574282  | -1.448001 | -1.746747 |
| 79 | 6 | 0 | -10.735507 | -2.236570 | -1.813872 |
| 80 | 6 | 0 | -10.692062 | -3.621590 | -1.874548 |
| 81 | 6 | 0 | -9.453687  | -4.269592 | -1.874500 |
| 82 | 6 | 0 | -8.287603  | -3.523705 | -1.818581 |
| 83 | 1 | 0 | -11.712751 | -1.750576 | -1.811035 |
| 84 | 1 | 0 | -11.620301 | -4.196876 | -1.922951 |
| 85 | 1 | 0 | -9.397749  | -5.361064 | -1.922623 |
| 86 | 1 | 0 | -7.314220  | -4.023674 | -1.812874 |
| 87 | 6 | 0 | -4.626376  | -2.843819 | 1.232658  |
| 88 | 6 | 0 | -4.627621  | -4.246123 | 1.056231  |
| 89 | 6 | 0 | -5.822927  | -4.941840 | 1.033262  |
| 90 | 6 | 0 | -7.033997  | -4.261201 | 1.190202  |

|     |   |   |            |           |           |
|-----|---|---|------------|-----------|-----------|
| 91  | 1 | 0 | -5.824616  | -6.026689 | 0.899600  |
| 92  | 1 | 0 | -7.957530  | -4.840599 | 1.164856  |
| 93  | 1 | 0 | -3.670771  | -4.762418 | 0.949031  |
| 94  | 6 | 0 | -7.099083  | -2.872285 | 1.363603  |
| 95  | 6 | 0 | -5.877588  | -2.148157 | 1.369111  |
| 96  | 7 | 0 | -5.862464  | -0.784430 | 1.499060  |
| 97  | 6 | 0 | -8.389045  | -2.164833 | 1.514803  |
| 98  | 1 | 0 | -4.937319  | -0.363987 | 1.483813  |
| 99  | 6 | 0 | -8.390186  | -0.757060 | 1.634338  |
| 100 | 5 | 0 | -7.061951  | -0.008322 | 1.610674  |
| 101 | 7 | 0 | -7.085259  | 1.406861  | 1.689872  |
| 102 | 6 | 0 | -9.589349  | -0.020986 | 1.748647  |
| 103 | 1 | 0 | -6.248228  | 1.974839  | 1.618020  |
| 104 | 6 | 0 | -8.270589  | 2.121045  | 1.801945  |
| 105 | 6 | 0 | -9.519563  | 1.452763  | 1.841645  |
| 106 | 6 | 0 | -10.674216 | 2.246992  | 1.950079  |
| 107 | 6 | 0 | -10.621632 | 3.631443  | 2.008052  |
| 108 | 6 | 0 | -9.380900  | 4.274340  | 1.963023  |
| 109 | 6 | 0 | -8.221241  | 3.523585  | 1.865925  |
| 110 | 1 | 0 | -11.653138 | 1.765561  | 1.982615  |
| 111 | 1 | 0 | -11.544784 | 4.211212  | 2.089089  |
| 112 | 1 | 0 | -9.318818  | 5.365567  | 2.008113  |
| 113 | 1 | 0 | -7.246430  | 4.018912  | 1.824067  |
| 114 | 6 | 0 | 7.033992   | 4.261187  | 1.190094  |
| 115 | 6 | 0 | 4.626359   | 2.843831  | 1.232615  |
| 116 | 6 | 0 | 4.627615   | 4.246134  | 1.056173  |
| 117 | 6 | 0 | 5.822927   | 4.941838  | 1.033159  |
| 118 | 1 | 0 | 7.957534   | 4.840565  | 1.164684  |
| 119 | 1 | 0 | 3.670767   | 4.762440  | 0.948997  |
| 120 | 1 | 0 | 5.824627   | 6.026683  | 0.899461  |
| 121 | 6 | 0 | 5.877560   | 2.148161  | 1.369076  |
| 122 | 6 | 0 | 7.099060   | 2.872276  | 1.363554  |
| 123 | 6 | 0 | 8.389012   | 2.164817  | 1.514798  |
| 124 | 7 | 0 | 5.862418   | 0.784436  | 1.499041  |
| 125 | 1 | 0 | 4.937267   | 0.364006  | 1.483819  |
| 126 | 5 | 0 | 7.061900   | 0.008314  | 1.610627  |
| 127 | 6 | 0 | 8.390143   | 0.757039  | 1.634275  |
| 128 | 6 | 0 | 9.589299   | 0.020957  | 1.748602  |
| 129 | 7 | 0 | 7.085194   | -1.406867 | 1.689867  |
| 130 | 1 | 0 | 6.248153   | -1.974839 | 1.618074  |
| 131 | 6 | 0 | 9.519502   | -1.452795 | 1.841564  |
| 132 | 6 | 0 | 8.270518   | -2.121061 | 1.801933  |
| 133 | 6 | 0 | 8.221154   | -3.523597 | 1.865996  |
| 134 | 6 | 0 | 9.380806   | -4.274365 | 1.963062  |
| 135 | 6 | 0 | 10.621551  | -3.631486 | 2.007960  |
| 136 | 6 | 0 | 10.674152  | -2.247038 | 1.949929  |
| 137 | 1 | 0 | 7.246332   | -4.018910 | 1.824224  |
| 138 | 1 | 0 | 9.318711   | -5.365589 | 2.008224  |
| 139 | 1 | 0 | 11.544701  | -4.211266 | 2.088948  |
| 140 | 1 | 0 | 11.653083  | -1.765622 | 1.982366  |
| 141 | 7 | 0 | -5.896900  | 0.771958  | -1.532849 |
| 142 | 1 | 0 | -4.973577  | 0.350343  | -1.559666 |
| 143 | 7 | 0 | -7.135929  | -1.412034 | -1.682602 |
| 144 | 1 | 0 | -6.299170  | -1.983796 | -1.653118 |

|     |   |   |            |           |           |
|-----|---|---|------------|-----------|-----------|
| 145 | 6 | 0 | -9.646566  | 2.839760  | -1.428763 |
| 146 | 6 | 0 | -10.841945 | 0.736241  | -1.609808 |
| 147 | 6 | 0 | -10.836321 | 2.122816  | -1.502856 |
| 148 | 1 | 0 | -11.802633 | 0.220411  | -1.653355 |
| 149 | 1 | 0 | -11.787346 | 2.661914  | -1.465235 |
| 150 | 1 | 0 | -9.699317  | 3.924602  | -1.328570 |
| 151 | 6 | 0 | -10.800822 | -0.726528 | 1.747599  |
| 152 | 6 | 0 | -9.618486  | -2.834305 | 1.524059  |
| 153 | 6 | 0 | -10.802653 | -2.113085 | 1.639217  |
| 154 | 1 | 0 | -11.757932 | -0.207804 | 1.823473  |
| 155 | 1 | 0 | -9.678075  | -3.918764 | 1.423733  |
| 156 | 1 | 0 | -11.756090 | -2.649148 | 1.632736  |
| 157 | 6 | 0 | 9.618452   | 2.834289  | 1.524173  |
| 158 | 6 | 0 | 10.800772  | 0.726497  | 1.747655  |
| 159 | 6 | 0 | 10.802611  | 2.113061  | 1.639357  |
| 160 | 1 | 0 | 11.757877  | 0.207769  | 1.823563  |
| 161 | 1 | 0 | 11.756048  | 2.649123  | 1.632973  |
| 162 | 1 | 0 | 9.678046   | 3.918758  | 1.423950  |
| 163 | 6 | 0 | 10.842000  | -0.736412 | -1.609881 |
| 164 | 6 | 0 | 9.646526   | -2.839888 | -1.428958 |
| 165 | 6 | 0 | 10.836312  | -2.122998 | -1.503073 |
| 166 | 1 | 0 | 11.802711  | -0.220629 | -1.653478 |
| 167 | 1 | 0 | 11.787314  | -2.662150 | -1.465616 |
| 168 | 1 | 0 | 9.699227   | -3.924751 | -1.328980 |

-----  
Ground to excited state transition electric dipole moments (Au):

| state | X       | Y       | Z      | Dip. S. | Osc.   |
|-------|---------|---------|--------|---------|--------|
| 1     | -4.2147 | -0.8917 | 0.0000 | 18.5590 | 1.3402 |
| 2     | 3.8703  | -0.5248 | 0.0000 | 15.2543 | 1.2543 |

Ground to excited state transition velocity dipole moments (Au):

| state | X       | Y      | Z       | Dip. S. | Osc.   |
|-------|---------|--------|---------|---------|--------|
| 1     | 0.4526  | 0.0954 | -0.0000 | 0.2140  | 1.3170 |
| 2     | -0.4742 | 0.0641 | -0.0000 | 0.2290  | 1.2375 |

Ground to excited state transition magnetic dipole moments (Au):

| state | X       | Y      | Z       |
|-------|---------|--------|---------|
| 1     | -0.5161 | 1.9401 | -0.0000 |
| 2     | 0.6639  | 1.9720 | 0.0001  |

Ground to excited state transition velocity quadrupole moments (Au):

| state | XX      | YY      | ZZ      | XY      | XZ     | YZ      |
|-------|---------|---------|---------|---------|--------|---------|
| 1     | -0.0000 | -0.0000 | -0.0000 | -0.0000 | 1.2630 | 0.3146  |
| 2     | -0.0000 | -0.0000 | 0.0000  | 0.0000  | 1.1984 | -0.3249 |

$\langle 0 | \text{del} | b \rangle * \langle b | r x \text{del} | 0 \rangle + \langle 0 | \text{del} | b \rangle * \langle b | \text{del} r + r \text{del} | 0 \rangle$

Rotatory Strengths (R) in cgs ( $10^{*-40}$  erg-esu-cm/Gauss)

| state | XX       | YY        | ZZ        | R(velocity) | E-M Angle |
|-------|----------|-----------|-----------|-------------|-----------|
| 1     | 210.8727 | -297.7534 | -229.9387 | -105.6065   | 93.00     |
| 2     | 142.1189 | -460.8494 | -761.7129 | -360.1478   | 100.91    |

$1/2[\langle 0|r|b\rangle\langle b|rxdel|0\rangle + (\langle 0|rxdel|b\rangle\langle b|r|0\rangle)^*]$   
 Rotatory Strengths (R) in cgs ( $10^{*-40}$  erg-esu-cm/Gauss)

| state | XX         | YY        | ZZ      | R(length) |
|-------|------------|-----------|---------|-----------|
| 1     | -1538.3005 | 1223.4136 | 0.0000  | -104.9623 |
| 2     | -1817.0467 | 731.8549  | -0.0000 | -361.7306 |

$1/2[\langle 0|del|b\rangle\langle b|r|0\rangle + (\langle 0|r|b\rangle\langle b|del|0\rangle)^*]$  (Au)

| state | X       | Y       | Z       | Dip. S. | Osc.(frdel) |
|-------|---------|---------|---------|---------|-------------|
| 1     | -1.9078 | -0.0851 | -0.0000 | 1.9929  | 1.3286      |
| 2     | -1.8352 | -0.0336 | -0.0000 | 1.8688  | 1.2459      |

-----  
 Excitation energies and oscillator strengths:  
 -----

Excited State 1: Singlet-A 2.9476 eV 420.62 nm f=1.3402 <S\*\*2>=0.000  
 352 -> 357 0.14771  
 354 -> 357 -0.30994  
 356 -> 357 -0.52810  
 356 -> 358 0.17158

Excited State 2: Singlet-A 3.3562 eV 369.42 nm f=1.2543 <S\*\*2>=0.000  
 351 -> 357 0.27573  
 351 -> 358 0.19887  
 352 -> 357 -0.22756  
 352 -> 358 -0.19830  
 354 -> 357 -0.20470  
 354 -> 358 -0.17264  
 356 -> 357 0.23680  
 356 -> 358 0.29177

Summary of chiroptical properties of (R)-6' ( $\omega$ B97XD/def2-SV(P))

| state | $ \mu_e $<br>/ $10^{-20}$ esu-cm | $ \mu_m $<br>/ $10^{-20}$ erg/Gauss | $\cos\theta$<br>(E-M Angle) | $g_{lum, calcd.}$<br>( $4R/(D+G)$ ) | $E_{ex}$<br>/nm |
|-------|----------------------------------|-------------------------------------|-----------------------------|-------------------------------------|-----------------|
| 1     | 1096                             | 1.862                               | -0.051                      | -0.000350                           | 421             |
| 2     | 993                              | 0.449                               | -0.189                      | -0.001467                           | 369             |

**Table S5.** Cartesian coordinates (Å) and transition moments of optimized structure of (R)-Ph-PCP<sup>[30]</sup> in the lowest-energy excited state ( $S_1$ ) calculated at the M06-2X/def2-SV(P) level of theory.

| Center Number | Atomic Number | Atomic Type | Coordinates (Angstroms) |           |           |
|---------------|---------------|-------------|-------------------------|-----------|-----------|
|               |               |             | X                       | Y         | Z         |
| 1             | 6             | 0           | -0.100446               | -1.416466 | -1.451732 |
| 2             | 6             | 0           | -1.236438               | -0.621283 | -1.559951 |
| 3             | 6             | 0           | -1.162096               | 0.794226  | -1.583323 |
| 4             | 6             | 0           | 0.100507                | 1.416365  | -1.451810 |
| 5             | 6             | 0           | 1.236498                | 0.621178  | -1.559985 |

|    |   |   |           |           |           |
|----|---|---|-----------|-----------|-----------|
| 6  | 6 | 0 | 1.162155  | -0.794335 | -1.583281 |
| 7  | 1 | 0 | -2.224168 | -1.085019 | -1.490089 |
| 8  | 1 | 0 | 2.224229  | 1.084915  | -1.490152 |
| 9  | 6 | 0 | -0.207329 | -2.802373 | -0.861195 |
| 10 | 1 | 0 | 0.432729  | -3.521639 | -1.397022 |
| 11 | 1 | 0 | -1.249704 | -3.148447 | -0.944726 |
| 12 | 6 | 0 | 0.221824  | -2.809006 | 0.664668  |
| 13 | 1 | 0 | 1.261415  | -3.161254 | 0.749404  |
| 14 | 1 | 0 | -0.425584 | -3.521788 | 1.201804  |
| 15 | 6 | 0 | -0.131252 | 1.426982  | 1.257992  |
| 16 | 6 | 0 | -1.248377 | 0.642932  | 1.386062  |
| 17 | 6 | 0 | -1.159043 | -0.791822 | 1.398258  |
| 18 | 6 | 0 | 0.131305  | -1.426918 | 1.258079  |
| 19 | 6 | 0 | 1.248427  | -0.642860 | 1.386099  |
| 20 | 6 | 0 | 1.159092  | 0.791896  | 1.398212  |
| 21 | 1 | 0 | -2.241674 | 1.090586  | 1.300489  |
| 22 | 1 | 0 | 2.241726  | -1.090513 | 1.300541  |
| 23 | 6 | 0 | -0.221787 | 2.809035  | 0.664498  |
| 24 | 6 | 0 | 0.207380  | 2.802307  | -0.861360 |
| 25 | 1 | 0 | -0.432675 | 3.521539  | -1.397238 |
| 26 | 1 | 0 | 1.249754  | 3.148386  | -0.944903 |
| 27 | 1 | 0 | 0.425608  | 3.521860  | 1.201590  |
| 28 | 1 | 0 | -1.261386 | 3.161268  | 0.749202  |
| 29 | 6 | 0 | 2.362113  | -1.559908 | -1.516289 |
| 30 | 6 | 0 | 3.392908  | -2.206097 | -1.435866 |
| 31 | 6 | 0 | -2.362061 | 1.559789  | -1.516348 |
| 32 | 6 | 0 | -3.392871 | 2.205954  | -1.435919 |
| 33 | 6 | 0 | 2.327193  | 1.558433  | 1.408794  |
| 34 | 6 | 0 | 3.362651  | 2.223640  | 1.399237  |
| 35 | 6 | 0 | -2.327155 | -1.558339 | 1.408862  |
| 36 | 6 | 0 | -3.362639 | -2.223507 | 1.399320  |
| 37 | 6 | 0 | 4.570263  | -4.360253 | -1.212179 |
| 38 | 6 | 0 | 4.605006  | -2.958655 | -1.331962 |
| 39 | 6 | 0 | 5.751975  | -5.086545 | -1.103798 |
| 40 | 6 | 0 | 6.985053  | -4.431806 | -1.114053 |
| 41 | 6 | 0 | 7.029323  | -3.041341 | -1.233579 |
| 42 | 6 | 0 | 5.852512  | -2.307299 | -1.341171 |
| 43 | 6 | 0 | -5.852476 | 2.307081  | -1.341391 |
| 44 | 6 | 0 | -4.604991 | 2.958476  | -1.332020 |
| 45 | 6 | 0 | -7.029320 | 3.041070  | -1.233796 |
| 46 | 6 | 0 | -6.985103 | 4.431524  | -1.114111 |
| 47 | 6 | 0 | -5.752047 | 5.086301  | -1.103697 |
| 48 | 6 | 0 | -4.570303 | 4.360062  | -1.212075 |
| 49 | 6 | 0 | -4.513276 | -4.391339 | 1.277110  |
| 50 | 6 | 0 | -4.555822 | -2.981501 | 1.383927  |
| 51 | 6 | 0 | -5.690097 | -5.127158 | 1.258519  |
| 52 | 6 | 0 | -6.928254 | -4.482189 | 1.344590  |
| 53 | 6 | 0 | -6.982534 | -3.088495 | 1.450269  |
| 54 | 6 | 0 | -5.813789 | -2.340049 | 1.470246  |
| 55 | 6 | 0 | 5.813797  | 2.340327  | 1.470380  |
| 56 | 6 | 0 | 4.555801  | 2.981688  | 1.383843  |
| 57 | 6 | 0 | 6.982497  | 3.088842  | 1.450408  |
| 58 | 6 | 0 | 6.928142  | 4.482517  | 1.344516  |
| 59 | 6 | 0 | 5.689956  | 5.127398  | 1.258231  |

|    |   |   |           |           |           |
|----|---|---|-----------|-----------|-----------|
| 60 | 6 | 0 | 4.513178  | 4.391508  | 1.276818  |
| 61 | 1 | 0 | -7.851376 | -5.066212 | 1.329137  |
| 62 | 1 | 0 | -5.646204 | -6.215760 | 1.175937  |
| 63 | 1 | 0 | -3.543145 | -4.888938 | 1.210112  |
| 64 | 1 | 0 | -7.911317 | 5.004753  | -1.030008 |
| 65 | 1 | 0 | -5.711366 | 6.174360  | -1.011551 |
| 66 | 1 | 0 | -3.603643 | 4.868867  | -1.207169 |
| 67 | 1 | 0 | 3.543023  | 4.889040  | 1.209656  |
| 68 | 1 | 0 | 5.646002  | 6.215985  | 1.175484  |
| 69 | 1 | 0 | 7.851232  | 5.066593  | 1.329065  |
| 70 | 1 | 0 | 3.603586  | -4.869027 | -1.207407 |
| 71 | 1 | 0 | 5.711250  | -6.174613 | -1.011778 |
| 72 | 1 | 0 | 7.911243  | -5.005074 | -1.029949 |
| 73 | 1 | 0 | -7.991831 | 2.523797  | -1.244335 |
| 74 | 1 | 0 | -5.881934 | 1.219371  | -1.435609 |
| 75 | 1 | 0 | -5.848504 | -1.251548 | 1.551987  |
| 76 | 1 | 0 | -7.949119 | -2.583543 | 1.517943  |
| 77 | 1 | 0 | 5.882013  | -1.219579 | -1.435261 |
| 78 | 1 | 0 | 7.991853  | -2.524099 | -1.243994 |
| 79 | 1 | 0 | 5.848570  | 1.251840  | 1.552291  |
| 80 | 1 | 0 | 7.949106  | 2.583960  | 1.518256  |

-----  
Ground to excited state transition electric dipole moments (Au):

| state | X       | Y       | Z      | Dip. S. | Osc.   |
|-------|---------|---------|--------|---------|--------|
| 1     | -3.2564 | -1.5752 | 0.0000 | 13.0852 | 0.9860 |
| 2     | 1.8144  | -1.6384 | 0.0000 | 5.9764  | 0.4915 |

Ground to excited state transition velocity dipole moments (Au):

| state | X       | Y      | Z       | Dip. S. | Osc.   |
|-------|---------|--------|---------|---------|--------|
| 1     | 0.3761  | 0.1821 | -0.0000 | 0.1746  | 1.0301 |
| 2     | -0.2286 | 0.2073 | -0.0000 | 0.0952  | 0.5147 |

Ground to excited state transition magnetic dipole moments (Au):

| state | X       | Y      | Z      |
|-------|---------|--------|--------|
| 1     | -1.1141 | 1.1558 | 0.0000 |
| 2     | 0.8139  | 1.4921 | 0.0000 |

Ground to excited state transition velocity quadrupole moments (Au):

| state | XX      | YY      | ZZ      | XY     | XZ     | YZ      |
|-------|---------|---------|---------|--------|--------|---------|
| 1     | -0.0000 | 0.0001  | -0.0000 | 0.0001 | 0.9199 | 0.7766  |
| 2     | -0.0000 | -0.0001 | 0.0000  | 0.0001 | 1.0001 | -0.4454 |

$\langle 0 | \text{del} | b \rangle * \langle b | \text{rxdel} | 0 \rangle + \langle 0 | \text{del} | b \rangle * \langle b | \text{delr+rdel} | 0 \rangle$

Rotatory Strengths (R) in cgs ( $10^{*-40}$  erg-esu-cm/Gauss)

| state | XX       | YY        | ZZ         | R(velocity) | E-M Angle |
|-------|----------|-----------|------------|-------------|-----------|
| 1     | 134.3857 | -397.0606 | -1042.1667 | -434.9472   | 108.11    |
| 2     | 292.3826 | -241.3887 | 656.1075   | 235.7005    | 76.40     |

$1/2[\langle 0 | r | b \rangle * \langle b | \text{rxdel} | 0 \rangle + (\langle 0 | \text{rxdel} | b \rangle * \langle b | r | 0 \rangle)]$

Rotatory Strengths (R) in cgs ( $10^{*-40}$  erg-esu-cm/Gauss)

| state | XX         | YY        | ZZ      | R(length) |
|-------|------------|-----------|---------|-----------|
| 1     | -2565.5117 | 1287.5598 | -0.0000 | -425.9840 |
| 2     | -1044.2456 | 1728.7961 | -0.0000 | 228.1835  |



$$1/2[\langle 0 | \text{del} | b \rangle^* \langle b | r | 0 \rangle + (\langle 0 | r | b \rangle^* \langle b | \text{del} | 0 \rangle)^*] \text{ (Au)}$$

| state | X       | Y       | Z       | Dip. S. | Osc.(frdel) |
|-------|---------|---------|---------|---------|-------------|
| 1     | -1.2248 | -0.2869 | -0.0000 | 1.5117  | 1.0078      |
| 2     | -0.4147 | -0.3397 | -0.0000 | 0.7544  | 0.5030      |

-----  
Excitation energies and oscillator strengths:  
-----

|                  |           |           |           |          |              |
|------------------|-----------|-----------|-----------|----------|--------------|
| Excited State 1: | Singlet-A | 3.0758 eV | 403.10 nm | f=0.9860 | <S**2>=0.000 |
| 160 ->161        | -0.68673  |           |           |          |              |
| Excited State 2: | Singlet-A | 3.3569 eV | 369.34 nm | f=0.4915 | <S**2>=0.000 |
| 155 ->161        | -0.12775  |           |           |          |              |
| 159 ->161        | 0.66390   |           |           |          |              |
| 159 ->162        | 0.11116   |           |           |          |              |

Summary of chiroptical properties of (R)-Ph-NBN (M06-2X/def2-SV(P))

| state | $ \mu_e $<br>/10 <sup>-20</sup> esu-cm | $ \mu_m $<br>/10 <sup>-20</sup> erg/Gauss | cosθ<br>(E-M Angle) | $g_{lum,calcd.}$<br>(4R/(D+G)) | E <sub>ex</sub><br>/nm |
|-------|----------------------------------------|-------------------------------------------|---------------------|--------------------------------|------------------------|
| 1     | -401                                   | 1.489                                     | -0.311              | -0.002014                      | 403                    |
| 2     | -417                                   | 1.576                                     | 0.233               | 0.002362                       | 369                    |

**Table S6.** Cartesian coordinates (Å) and transition moments of optimized structure of (R)-Naph-PCP<sup>[30]</sup> in the lowest-energy excited state (S<sub>1</sub>) calculated at the M06-2X/def2-SV(P) level of theory.

| Center Number | Atomic Number | Atomic Type | Coordinates (Angstroms) |           |           |
|---------------|---------------|-------------|-------------------------|-----------|-----------|
|               |               |             | X                       | Y         | Z         |
| 1             | 6             | 0           | -0.150058               | -1.413935 | 1.403890  |
| 2             | 6             | 0           | 1.100762                | -0.831907 | 1.556976  |
| 3             | 6             | 0           | 1.279623                | 0.567008  | 1.533657  |
| 4             | 6             | 0           | 0.149927                | 1.413817  | 1.404071  |
| 5             | 6             | 0           | -1.100881               | 0.831767  | 1.557168  |
| 6             | 6             | 0           | -1.279758               | -0.567153 | 1.533704  |
| 7             | 1             | 0           | 1.996527                | -1.459106 | 1.506836  |
| 8             | 1             | 0           | -1.996646               | 1.458976  | 1.507195  |
| 9             | 6             | 0           | -0.247949               | -2.794149 | 0.792511  |
| 10            | 1             | 0           | -1.295313               | -3.131634 | 0.822748  |
| 11            | 1             | 0           | 0.347226                | -3.524988 | 1.364682  |
| 12            | 6             | 0           | 0.260047                | -2.793872 | -0.705238 |
| 13            | 1             | 0           | -0.327695               | -3.535232 | -1.271021 |
| 14            | 1             | 0           | 1.311124                | -3.120492 | -0.738054 |
| 15            | 6             | 0           | -0.141240               | 1.420409  | -1.328652 |
| 16            | 6             | 0           | 1.098142                | 0.853391  | -1.490682 |
| 17            | 6             | 0           | 1.293031                | -0.565127 | -1.473949 |
| 18            | 6             | 0           | 0.141331                | -1.420320 | -1.328812 |
| 19            | 6             | 0           | -1.098065               | -0.853285 | -1.490789 |

|    |   |   |           |           |           |
|----|---|---|-----------|-----------|-----------|
| 20 | 6 | 0 | -1.292942 | 0.565233  | -1.473922 |
| 21 | 1 | 0 | 1.993252  | 1.479728  | -1.416362 |
| 22 | 1 | 0 | -1.993186 | -1.479621 | -1.416624 |
| 23 | 6 | 0 | -0.259963 | 2.793898  | -0.704998 |
| 24 | 6 | 0 | 0.247848  | 2.794112  | 0.792821  |
| 25 | 1 | 0 | 1.295200  | 3.131611  | 0.823199  |
| 26 | 1 | 0 | -0.347431 | 3.524878  | 1.364958  |
| 27 | 1 | 0 | -1.311016 | 3.120589  | -0.737931 |
| 28 | 1 | 0 | 0.327872  | 3.535270  | -1.270685 |
| 29 | 6 | 0 | -2.616371 | -1.050445 | 1.440044  |
| 30 | 6 | 0 | -3.784897 | -1.381416 | 1.329503  |
| 31 | 6 | 0 | 2.616226  | 1.050328  | 1.440080  |
| 32 | 6 | 0 | 3.784681  | 1.381496  | 1.329432  |
| 33 | 6 | 0 | -2.601298 | 1.043365  | -1.408616 |
| 34 | 6 | 0 | -3.784670 | 1.382796  | -1.316921 |
| 35 | 6 | 0 | 2.601404  | -1.043217 | -1.408601 |
| 36 | 6 | 0 | 3.784782  | -1.382652 | -1.316865 |
| 37 | 6 | 0 | -5.484919 | -3.073452 | 0.889958  |
| 38 | 6 | 0 | -5.154876 | -1.767532 | 1.227431  |
| 39 | 6 | 0 | -6.831443 | -3.473079 | 0.781603  |
| 40 | 6 | 0 | -7.844089 | -2.569736 | 1.016006  |
| 41 | 6 | 0 | -7.553383 | -1.227422 | 1.374991  |
| 42 | 6 | 0 | -6.196138 | -0.807061 | 1.479334  |
| 43 | 6 | 0 | -8.589200 | -0.286856 | 1.632712  |
| 44 | 6 | 0 | -5.919354 | 0.541855  | 1.825318  |
| 45 | 6 | 0 | -6.942812 | 1.428155  | 2.067079  |
| 46 | 6 | 0 | -8.293035 | 1.009242  | 1.975983  |
| 47 | 1 | 0 | -9.627784 | -0.619500 | 1.550816  |
| 48 | 1 | 0 | -4.877296 | 0.864725  | 1.889178  |
| 49 | 1 | 0 | -6.713949 | 2.464944  | 2.324728  |
| 50 | 1 | 0 | -9.096025 | 1.724339  | 2.171105  |
| 51 | 6 | 0 | 5.919339  | -0.541491 | 1.825560  |
| 52 | 6 | 0 | 6.195960  | 0.807370  | 1.479235  |
| 53 | 6 | 0 | 5.154614  | 1.767765  | 1.227312  |
| 54 | 6 | 0 | 7.553164  | 1.227810  | 1.374641  |
| 55 | 6 | 0 | 7.843737  | 2.570117  | 1.015532  |
| 56 | 6 | 0 | 6.831009  | 3.473387  | 0.781203  |
| 57 | 6 | 0 | 5.484524  | 3.073684  | 0.889728  |
| 58 | 6 | 0 | 6.942907  | -1.427649 | 2.067386  |
| 59 | 6 | 0 | 8.589099  | 0.287355  | 1.632306  |
| 60 | 6 | 0 | 8.293087  | -1.008687 | 1.975893  |
| 61 | 1 | 0 | 4.877317  | -0.864414 | 1.889724  |
| 62 | 1 | 0 | 6.714153  | -2.464373 | 2.325382  |
| 63 | 1 | 0 | 9.627644  | 0.620064  | 1.550157  |
| 64 | 1 | 0 | 9.096159  | -1.723694 | 2.171008  |
| 65 | 6 | 0 | 5.476286  | -3.085132 | -0.906675 |
| 66 | 6 | 0 | 5.132771  | -1.763716 | -1.238215 |
| 67 | 6 | 0 | 6.815462  | -3.478489 | -0.816769 |
| 68 | 6 | 0 | 7.834223  | -2.570976 | -1.058648 |
| 69 | 6 | 0 | 7.542245  | -1.229453 | -1.411952 |
| 70 | 6 | 0 | 6.184339  | -0.802436 | -1.501319 |
| 71 | 6 | 0 | 8.576736  | -0.291676 | -1.682882 |
| 72 | 6 | 0 | 5.910022  | 0.540519  | -1.847876 |
| 73 | 6 | 0 | 6.934941  | 1.428223  | -2.105560 |

|     |   |   |           |           |           |
|-----|---|---|-----------|-----------|-----------|
| 74  | 6 | 0 | 8.281503  | 1.006605  | -2.027802 |
| 75  | 1 | 0 | 9.615298  | -0.627219 | -1.612415 |
| 76  | 1 | 0 | 4.868212  | 0.866539  | -1.904839 |
| 77  | 1 | 0 | 6.703848  | 2.463642  | -2.366749 |
| 78  | 1 | 0 | 9.085698  | 1.717227  | -2.234517 |
| 79  | 6 | 0 | -5.909505 | -0.540792 | -1.847847 |
| 80  | 6 | 0 | -6.184094 | 0.802188  | -1.501607 |
| 81  | 6 | 0 | -5.132726 | 1.763673  | -1.238523 |
| 82  | 6 | 0 | -7.542080 | 1.228984  | -1.412438 |
| 83  | 6 | 0 | -7.834332 | 2.570514  | -1.059360 |
| 84  | 6 | 0 | -6.815747 | 3.478214  | -0.817444 |
| 85  | 6 | 0 | -5.476491 | 3.085069  | -0.907168 |
| 86  | 6 | 0 | -6.934240 | -1.428755 | -2.105357 |
| 87  | 6 | 0 | -8.576382 | 0.290953  | -1.683204 |
| 88  | 6 | 0 | -8.280886 | -1.007371 | -2.027757 |
| 89  | 1 | 0 | -4.867629 | -0.866631 | -1.904656 |
| 90  | 1 | 0 | -6.702944 | -2.464194 | -2.366286 |
| 91  | 1 | 0 | -9.615007 | 0.626327  | -1.612874 |
| 92  | 1 | 0 | -9.084933 | -1.718194 | -2.234356 |
| 93  | 1 | 0 | 8.880724  | -2.879970 | -0.987867 |
| 94  | 1 | 0 | 7.055502  | -4.511679 | -0.554116 |
| 95  | 1 | 0 | 4.675935  | -3.803458 | -0.717337 |
| 96  | 1 | 0 | 8.890677  | 2.875207  | 0.932653  |
| 97  | 1 | 0 | 7.065591  | 4.505809  | 0.511720  |
| 98  | 1 | 0 | 4.682434  | 3.792147  | 0.708328  |
| 99  | 1 | 0 | -4.676280 | 3.803554  | -0.717835 |
| 100 | 1 | 0 | -7.055984 | 4.511399  | -0.554950 |
| 101 | 1 | 0 | -8.880894 | 2.879336  | -0.988729 |
| 102 | 1 | 0 | -4.682898 | -3.792000 | 0.708575  |
| 103 | 1 | 0 | -7.066115 | -4.505504 | 0.512207  |
| 104 | 1 | 0 | -8.891058 | -2.874767 | 0.933292  |

-----  
Ground to excited state transition electric dipole moments (Au):

| state | X       | Y      | Z       | Dip. S. | Osc.   |
|-------|---------|--------|---------|---------|--------|
| 1     | -2.8704 | 0.8257 | -0.0002 | 8.9207  | 0.6378 |
| 2     | 3.5305  | 0.1928 | -0.0001 | 12.5013 | 0.9985 |

Ground to excited state transition velocity dipole moments (Au):

| state | X       | Y       | Z      | Dip. S. | Osc.   |
|-------|---------|---------|--------|---------|--------|
| 1     | 0.3194  | -0.0927 | 0.0000 | 0.1106  | 0.6874 |
| 2     | -0.4388 | -0.0228 | 0.0000 | 0.1931  | 1.0743 |

Ground to excited state transition magnetic dipole moments (Au):

| state | X       | Y       | Z       |
|-------|---------|---------|---------|
| 1     | -0.3281 | -2.4501 | -0.0000 |
| 2     | 0.5740  | -1.1205 | 0.0003  |

Ground to excited state transition velocity quadrupole moments (Au):

| state | XX     | YY      | ZZ      | XY      | XZ      | YZ      |
|-------|--------|---------|---------|---------|---------|---------|
| 1     | 0.0002 | 0.0000  | -0.0000 | -0.0001 | -1.3794 | 0.1711  |
| 2     | 0.0003 | -0.0001 | 0.0000  | -0.0000 | -0.3972 | -0.2903 |

$$\langle 0 | \text{del} | b \rangle * \langle b | \text{rxdel} | 0 \rangle + \langle 0 | \text{del} | b \rangle * \langle b | \text{delr+rdel} | 0 \rangle$$

| Rotatory Strengths (R) in cgs ( $10^{**}-40$ erg-esu-cm/Gauss) |          |           |            |             |           |
|----------------------------------------------------------------|----------|-----------|------------|-------------|-----------|
| state                                                          | XX       | YY        | ZZ         | R(velocity) | E-M Angle |
| 1                                                              | 327.2468 | -165.3496 | 644.8904   | 268.9292    | 81.44     |
| 2                                                              | 48.5907  | -367.3629 | -1017.2880 | -445.3534   | 114.15    |

$$1/2[\langle 0 | r | b \rangle * \langle b | \text{rxdel} | 0 \rangle + (\langle 0 | \text{rxdel} | b \rangle * \langle b | r | 0 \rangle) *]$$

| Rotatory Strengths (R) in cgs ( $10^{**}-40$ erg-esu-cm/Gauss) |            |           |         |           |
|----------------------------------------------------------------|------------|-----------|---------|-----------|
| state                                                          | XX         | YY        | ZZ      | R(length) |
| 1                                                              | -666.0223  | 1430.6567 | -0.0000 | 254.8781  |
| 2                                                              | -1432.9903 | 152.7632  | 0.0000  | -426.7424 |

$$1/2[\langle 0 | \text{del} | b \rangle * \langle b | r | 0 \rangle + (\langle 0 | r | b \rangle * \langle b | \text{del} | 0 \rangle) *] \text{ (Au)}$$

| state | X       | Y       | Z       | Dip. S. | Osc.(frdel) |
|-------|---------|---------|---------|---------|-------------|
| 1     | -0.9167 | -0.0766 | -0.0000 | 0.9932  | 0.6622      |
| 2     | -1.5492 | -0.0044 | -0.0000 | 1.5536  | 1.0357      |

-----  
Excitation energies and oscillator strengths:  
-----

Excited State 1: Singlet-A 2.9183 eV 424.84 nm f=0.6378 <S\*\*2>=0.000  
 211 ->214 -0.14711  
 212 ->213 0.65949

Excited State 2: Singlet-A 3.2602 eV 380.30 nm f=0.9985 <S\*\*2>=0.000  
 211 ->214 -0.23896  
 212 ->213 -0.14288  
 212 ->214 -0.62158

Summary of chiroptical properties of (R)-Naph-PCP (M06-2X/def2-SV(P))

| state | $ \mu_e $<br>/ $10^{-20}$ esu-cm | $ \mu_m $<br>/ $10^{-20}$ erg/Gauss | $\cos\theta$<br>(E-M Angle) | $g_{lum, calcd.}$<br>( $4R/(D+G)$ ) | $E_{ex}$<br>/nm |
|-------|----------------------------------|-------------------------------------|-----------------------------|-------------------------------------|-----------------|
| 1     | -760                             | 2.293                               | 0.146                       | 0.001768                            | 425             |
| 2     | -899                             | 1.168                               | -0.407                      | -0.002112                           | 380             |

**Table S7.** Cartesian coordinates (Å) and transition moments of optimized structure of (R)-Anth-PCP<sup>[30]</sup> in the lowest-energy excited state (S<sub>1</sub>) calculated at the M06-2X/def2-SV(P) level of theory.

| Center Number | Atomic Number | Atomic Type | Coordinates (Angstroms) |           |          |
|---------------|---------------|-------------|-------------------------|-----------|----------|
|               |               |             | X                       | Y         | Z        |
| 1             | 6             | 0           | -0.034669               | -1.395691 | 1.292878 |
| 2             | 6             | 0           | 1.200831                | -0.778732 | 1.434715 |
| 3             | 6             | 0           | 1.334685                | 0.627786  | 1.386280 |
| 4             | 6             | 0           | 0.174461                | 1.436050  | 1.262871 |
| 5             | 6             | 0           | -1.053667               | 0.818445  | 1.446764 |
| 6             | 6             | 0           | -1.186099               | -0.585624 | 1.429548 |

|    |   |   |           |           |           |
|----|---|---|-----------|-----------|-----------|
| 7  | 1 | 0 | 2.111246  | -1.382871 | 1.387004  |
| 8  | 1 | 0 | -1.968878 | 1.417545  | 1.399809  |
| 9  | 6 | 0 | -0.117713 | -2.788747 | 0.715088  |
| 10 | 1 | 0 | -1.066494 | -3.260412 | 1.013904  |
| 11 | 1 | 0 | 0.698412  | -3.408260 | 1.118695  |
| 12 | 6 | 0 | -0.015834 | -2.794819 | -0.875775 |
| 13 | 1 | 0 | -0.835873 | -3.412121 | -1.275515 |
| 14 | 1 | 0 | 0.930442  | -3.275657 | -1.168962 |
| 15 | 6 | 0 | -0.251200 | 1.426927  | -1.475415 |
| 16 | 6 | 0 | 0.968115  | 0.789643  | -1.658345 |
| 17 | 6 | 0 | 1.080519  | -0.616124 | -1.613282 |
| 18 | 6 | 0 | -0.086210 | -1.407000 | -1.467541 |
| 19 | 6 | 0 | -1.310825 | -0.769271 | -1.612393 |
| 20 | 6 | 0 | -1.420669 | 0.636614  | -1.573977 |
| 21 | 1 | 0 | 1.890491  | 1.377841  | -1.621792 |
| 22 | 1 | 0 | -2.231952 | -1.356230 | -1.551743 |
| 23 | 6 | 0 | -0.267752 | 2.812314  | -0.869125 |
| 24 | 6 | 0 | 0.226244  | 2.813414  | 0.641003  |
| 25 | 1 | 0 | 1.259240  | 3.192662  | 0.685250  |
| 26 | 1 | 0 | -0.402671 | 3.518773  | 1.208125  |
| 27 | 1 | 0 | -1.289519 | 3.218644  | -0.918438 |
| 28 | 1 | 0 | 0.379871  | 3.494230  | -1.443352 |
| 29 | 6 | 0 | -2.506106 | -1.114921 | 1.317645  |
| 30 | 6 | 0 | -3.664553 | -1.462301 | 1.165471  |
| 31 | 6 | 0 | 2.657031  | 1.127625  | 1.269219  |
| 32 | 6 | 0 | 3.855119  | 1.368543  | 1.170563  |
| 33 | 6 | 0 | -2.730393 | 1.176366  | -1.394830 |
| 34 | 6 | 0 | -3.880619 | 1.522692  | -1.188643 |
| 35 | 6 | 0 | 2.395897  | -1.135936 | -1.487221 |
| 36 | 6 | 0 | 3.586599  | -1.376915 | -1.330718 |
| 37 | 6 | 0 | -4.353980 | -3.987278 | -0.062683 |
| 38 | 6 | 0 | -5.355566 | -3.091544 | 0.425252  |
| 39 | 6 | 0 | -5.030280 | -1.841452 | 1.009091  |
| 40 | 6 | 0 | -6.732775 | -3.471792 | 0.298126  |
| 41 | 6 | 0 | -7.732369 | -2.606889 | 0.756037  |
| 42 | 6 | 0 | -7.425811 | -1.362080 | 1.313211  |
| 43 | 6 | 0 | -6.054716 | -0.957423 | 1.434588  |
| 44 | 6 | 0 | -4.696315 | -5.177228 | -0.645592 |
| 45 | 6 | 0 | -7.050801 | -4.728115 | -0.310828 |
| 46 | 6 | 0 | -8.455051 | -0.469676 | 1.756395  |
| 47 | 6 | 0 | -5.771599 | 0.337716  | 1.970836  |
| 48 | 6 | 0 | -6.782506 | 1.169423  | 2.369284  |
| 49 | 6 | 0 | -8.144970 | 0.756755  | 2.271393  |
| 50 | 1 | 0 | -9.495362 | -0.793893 | 1.664940  |
| 51 | 1 | 0 | -4.729240 | 0.656863  | 2.043231  |
| 52 | 1 | 0 | -6.546991 | 2.163257  | 2.759082  |
| 53 | 1 | 0 | -8.937147 | 1.433931  | 2.600403  |
| 54 | 6 | 0 | -6.066049 | -5.555643 | -0.772702 |
| 55 | 1 | 0 | -3.304851 | -3.697312 | 0.035544  |
| 56 | 1 | 0 | -3.916845 | -5.846722 | -1.016954 |
| 57 | 1 | 0 | -8.103904 | -5.008662 | -0.400529 |
| 58 | 1 | 0 | -6.321536 | -6.510064 | -1.238811 |
| 59 | 6 | 0 | 5.541695  | -0.773971 | 2.053326  |
| 60 | 6 | 0 | 6.079173  | 0.434250  | 1.559751  |

|     |   |   |           |           |           |
|-----|---|---|-----------|-----------|-----------|
| 61  | 6 | 0 | 5.252482  | 1.520625  | 1.113755  |
| 62  | 6 | 0 | 7.507580  | 0.571445  | 1.489459  |
| 63  | 6 | 0 | 8.065446  | 1.744110  | 0.963478  |
| 64  | 6 | 0 | 7.266261  | 2.836734  | 0.554990  |
| 65  | 6 | 0 | 5.842659  | 2.737118  | 0.632752  |
| 66  | 6 | 0 | 6.362082  | -1.803862 | 2.501871  |
| 67  | 6 | 0 | 8.318861  | -0.513141 | 1.922910  |
| 68  | 6 | 0 | 7.841696  | 4.023905  | 0.032664  |
| 69  | 6 | 0 | 5.057373  | 3.833879  | 0.203469  |
| 70  | 6 | 0 | 5.646607  | 4.982044  | -0.288328 |
| 71  | 6 | 0 | 7.052383  | 5.077463  | -0.379795 |
| 72  | 1 | 0 | 8.931475  | 4.089436  | -0.033648 |
| 73  | 1 | 0 | 3.969012  | 3.753887  | 0.267090  |
| 74  | 1 | 0 | 5.022711  | 5.818593  | -0.611476 |
| 75  | 1 | 0 | 7.512703  | 5.986060  | -0.774753 |
| 76  | 6 | 0 | 7.757720  | -1.666225 | 2.447221  |
| 77  | 1 | 0 | 4.456239  | -0.886092 | 2.095889  |
| 78  | 1 | 0 | 5.916533  | -2.725487 | 2.883573  |
| 79  | 1 | 0 | 9.405739  | -0.403647 | 1.865326  |
| 80  | 1 | 0 | 8.399682  | -2.480609 | 2.791600  |
| 81  | 6 | 0 | 4.699257  | -3.821137 | -0.224953 |
| 82  | 6 | 0 | 5.523596  | -2.749620 | -0.645684 |
| 83  | 6 | 0 | 4.978997  | -1.535811 | -1.183935 |
| 84  | 6 | 0 | 6.940758  | -2.873273 | -0.498478 |
| 85  | 6 | 0 | 7.777637  | -1.806044 | -0.892176 |
| 86  | 6 | 0 | 7.264251  | -0.625423 | -1.444706 |
| 87  | 6 | 0 | 5.842116  | -0.464809 | -1.585209 |
| 88  | 6 | 0 | 5.244619  | -4.965437 | 0.324668  |
| 89  | 6 | 0 | 7.469118  | -4.057059 | 0.079046  |
| 90  | 6 | 0 | 8.116704  | 0.442681  | -1.839220 |
| 91  | 6 | 0 | 5.352095  | 0.756079  | -2.099415 |
| 92  | 6 | 0 | 6.212614  | 1.772944  | -2.499344 |
| 93  | 6 | 0 | 7.601380  | 1.608957  | -2.382530 |
| 94  | 1 | 0 | 9.197318  | 0.310106  | -1.734721 |
| 95  | 1 | 0 | 4.271947  | 0.888626  | -2.191762 |
| 96  | 1 | 0 | 5.804074  | 2.705086  | -2.895975 |
| 97  | 1 | 0 | 8.273027  | 2.413451  | -2.691386 |
| 98  | 6 | 0 | 6.642521  | -5.085849 | 0.481509  |
| 99  | 1 | 0 | 3.616386  | -3.725365 | -0.341123 |
| 100 | 1 | 0 | 4.590248  | -5.781024 | 0.641372  |
| 101 | 1 | 0 | 8.553453  | -4.138691 | 0.197391  |
| 102 | 1 | 0 | 7.066428  | -5.992007 | 0.920225  |
| 103 | 6 | 0 | -5.982933 | -0.313998 | -1.898478 |
| 104 | 6 | 0 | -6.268375 | 0.973903  | -1.344979 |
| 105 | 6 | 0 | -5.244139 | 1.881482  | -0.972499 |
| 106 | 6 | 0 | -7.640159 | 1.344740  | -1.148926 |
| 107 | 6 | 0 | -7.946775 | 2.582815  | -0.577070 |
| 108 | 6 | 0 | -6.944986 | 3.471894  | -0.173823 |
| 109 | 6 | 0 | -5.567715 | 3.123724  | -0.372884 |
| 110 | 6 | 0 | -6.992567 | -1.171233 | -2.241035 |
| 111 | 6 | 0 | -8.669310 | 0.424461  | -1.531880 |
| 112 | 6 | 0 | -7.259838 | 4.720695  | 0.452220  |
| 113 | 6 | 0 | -4.563079 | 4.040745  | 0.066685  |
| 114 | 6 | 0 | -4.901875 | 5.221865  | 0.668995  |

|     |   |   |           |           |           |
|-----|---|---|-----------|-----------|-----------|
| 115 | 6 | 0 | -6.271710 | 5.569668  | 0.865129  |
| 116 | 1 | 0 | -8.313020 | 4.977337  | 0.596001  |
| 117 | 1 | 0 | -3.514181 | 3.773960  | -0.084192 |
| 118 | 1 | 0 | -4.119958 | 5.908110  | 1.002588  |
| 119 | 1 | 0 | -6.524637 | 6.517849  | 1.345219  |
| 120 | 6 | 0 | -8.357645 | -0.794468 | -2.063418 |
| 121 | 1 | 0 | -4.938867 | -0.605340 | -2.033313 |
| 122 | 1 | 0 | -6.753696 | -2.157300 | -2.647900 |
| 123 | 1 | 0 | -9.710979 | 0.722127  | -1.383039 |
| 124 | 1 | 0 | -9.150022 | -1.491281 | -2.348082 |
| 125 | 1 | 0 | 9.154164  | 1.835912  | 0.904011  |
| 126 | 1 | 0 | 8.860759  | -1.917892 | -0.788184 |
| 127 | 1 | 0 | -8.781160 | -2.904327 | 0.660079  |
| 128 | 1 | 0 | -8.995692 | 2.855094  | -0.424649 |

-----  
Ground to excited state transition electric dipole moments (Au):

| state | X       | Y       | Z       | Dip. S. | Osc.   |
|-------|---------|---------|---------|---------|--------|
| 1     | 3.6384  | 0.0121  | 0.0176  | 13.2387 | 0.8511 |
| 2     | -0.8751 | -0.9667 | -0.1887 | 1.7358  | 0.1218 |

Ground to excited state transition velocity dipole moments (Au):

| state | X       | Y      | Z       | Dip. S. | Osc.   |
|-------|---------|--------|---------|---------|--------|
| 2     | -0.3813 | 0.0005 | -0.0024 | 0.1454  | 1.0050 |
| 3     | 0.0981  | 0.1108 | 0.0229  | 0.0224  | 0.1421 |

Ground to excited state transition magnetic dipole moments (Au):

| state | X       | Y      | Z       |
|-------|---------|--------|---------|
| 2     | 0.3382  | 0.1776 | -0.0598 |
| 3     | -0.1420 | 1.6575 | 0.8639  |

Ground to excited state transition velocity quadrupole moments (Au):

| state | XX      | YY      | ZZ      | XY      | XZ      | YZ      |
|-------|---------|---------|---------|---------|---------|---------|
| 2     | -2.0411 | 0.0110  | -0.0360 | -0.1026 | -0.0198 | 0.1131  |
| 3     | 0.2541  | -0.0276 | -0.0260 | -0.7523 | 0.8747  | -0.0076 |

$\langle 0 | \text{del} | b \rangle * \langle b | \text{rxdel} | 0 \rangle + \langle 0 | \text{del} | b \rangle * \langle b | \text{delr+rdel} | 0 \rangle$

Rotatory Strengths (R) in cgs ( $10^{*-40}$  erg-esu-cm/Gauss)

| state | XX       | YY        | ZZ        | R(velocity) | E-M Angle |
|-------|----------|-----------|-----------|-------------|-----------|
| 2     | 1.7939   | -631.1657 | -314.3922 | -314.5880   | 150.82    |
| 3     | 300.0291 | 75.2066   | 898.3812  | 424.5390    | 47.54     |

$1/2[\langle 0 | r | b \rangle * \langle b | \text{rxdel} | 0 \rangle + (\langle 0 | \text{rxdel} | b \rangle * \langle b | r | 0 \rangle)]$

Rotatory Strengths (R) in cgs ( $10^{*-40}$  erg-esu-cm/Gauss)

| state | XX        | YY        | ZZ       | R(length) |
|-------|-----------|-----------|----------|-----------|
| 1     | -870.0823 | -1.5194   | 0.7443   | -290.2858 |
| 2     | -87.8666  | 1133.0738 | 115.2533 | 386.8202  |

$1/2[\langle 0 | \text{del} | b \rangle * \langle b | r | 0 \rangle + (\langle 0 | r | b \rangle * \langle b | \text{del} | 0 \rangle)]$  (Au)

| state | X       | Y       | Z       | Dip. S. | Osc.(frdel) |
|-------|---------|---------|---------|---------|-------------|
| 1     | -1.3872 | 0.0000  | -0.0000 | 1.3872  | 0.9248      |
| 2     | -0.0859 | -0.1071 | -0.0043 | 0.1973  | 0.1315      |

-----  
Excitation energies and oscillator strengths:  
-----

Excited State 1: Singlet-A 2.6240 eV 472.49 nm f=0.8511 <S\*\*2>=0.000  
261 -> 265 0.20709  
261 -> 267 -0.11026  
263 -> 265 -0.65655

Excited State 2: Singlet-A 2.8638 eV 432.93 nm f=0.1218 <S\*\*2>=0.000  
261 -> 266 0.18710  
261 -> 268 0.13972  
262 -> 265 0.21709  
262 -> 267 0.17388  
263 -> 266 0.51958  
264 -> 266 -0.16434  
264 -> 267 -0.19964

-----  
Summary of chiroptical properties of (R)-Anth-PCP (M06-2X/def2-SV(P))  
-----

| state | $ \mu_e $<br>/10 <sup>-20</sup> esu-cm | $ \mu_m $<br>/10 <sup>-20</sup> erg/Gauss | cos $\theta$<br>(E-M Angle) | $g_{lum, calcd.}$<br>(4R/(D+G)) | E <sub>ex</sub><br>/nm |
|-------|----------------------------------------|-------------------------------------------|-----------------------------|---------------------------------|------------------------|
| 1     | 101                                    | 0.359                                     | -0.876                      | -0.001357                       | 472                    |
| 2     | 335                                    | 1.738                                     | 0.665                       | 0.013787                        | 433                    |

-----



## Adiabatic Ionization Energies

The structures of neutral **6'**, radical cation **6'<sup>+</sup>**, and diradical dication **6'<sup>2+</sup>** were optimized using the TPSS<sup>[9]</sup> meta functional in conjunction and the resolution of the identity approximation. The geometry optimizations were performed using the def2-TZVP basis set along with the recommended fitting bases required for the RI approximation.<sup>[11,12]</sup> In addition, dispersion interactions between the NBN-moieties were dealt with using Grimme's D3 scheme along with Becke-Johnson damping.<sup>[13,14]</sup> Subsequently, harmonic vibrational frequencies were computed by finite differences of analytical gradients.

Energies were refined by single point computations at the M06-2X/def2-TZVP//RI-TPSS-D3(BJ)/def2-TZVP level of theory. To speed up the M06-2X computation, with the Coulomb and HF exchange resolution of identity (RI) approximation RIJCOSX<sup>[31]</sup> was used in conjunction with the general def2/J<sup>[12]</sup> auxiliary basis set. The solvation model based on density (SMD)<sup>[32]</sup> was used to simulate the solvation energies in CH<sub>2</sub>Cl<sub>2</sub> for geometry optimizations as well as single point calculations. The *Lebedev* numerical quadrature grid6 was employed. These computations were done with Orca 4.2.1.<sup>[33,34]</sup>

**Table S8.** Total energies and thermal contributions at 298 K at the M06-2X/def2-TZVP level of theory in dichloromethane (SMD method).

| compound               | E <sub>el</sub><br>/Hartree | ZPE<br>/eV | E <sub>solv</sub><br>/eV | H <sup>0</sup><br>/eV | G <sup>0</sup><br>/eV |
|------------------------|-----------------------------|------------|--------------------------|-----------------------|-----------------------|
| <b>6'</b>              | -4232.15973                 | 35.12      | -3.10                    | -115125.63            | -115130.43            |
| <b>6'<sup>+</sup></b>  | -4231.95113                 | 35.20      | -4.23                    | -115119.89            | -115124.67            |
| <b>6'<sup>2+</sup></b> | -4231.73535                 | 35.21      | -6.27                    | -115114.00            | -115118.80            |

Electronic energy is the dispersion and solvation corrected total energy from the electronic structure calculation  $E_{el} = E_{kin-el} + E_{nuc-el} + E_{el-el} + E_{nuc-nuc} + E_{disp} + E_{solv}$ . Enthalpy is defined as  $H^0 = U + k_bT$  at 298 K, with  $U = E_{ZPE} + E_{vib} + E_{rot} + E_{trans}$  and zero-point energy corrected electronic energy  $E_{ZPE} = E_{el} + ZPE$ . The Gibbs free energy is  $G^0 = H^0 - T \cdot S$  with the entropy contributions  $T \cdot S = T \cdot (S_{el} + S_{vib} + S_{rot} + S_{trans})$  at  $T = 298$  K.

**Table S9.** Zero-point energy corrected electronic energy  $\Delta E_{\text{ZPE}}$ , enthalpy  $\Delta H^0$  (at 298 K) and Gibbs free energy  $\Delta G^0$  (at 298 K) in solution (SMD method in  $\text{CH}_2\text{Cl}_2$ , M06-2X/def2-TZVP//TPSS-D3(BJ)/def2-TZVP) for the adiabatic oxidation steps of  $6^{\cdot}$  to the radical cation  $6^{\cdot+}$  and the diradical dication  $6^{2+}$ .

| oxidation step                     | $\Delta E_{\text{ZPE}}$<br>/eV | $\Delta H^0$<br>/eV | $\Delta G^0$<br>/eV |
|------------------------------------|--------------------------------|---------------------|---------------------|
| $6^{\cdot} \rightarrow 6^{\cdot+}$ | 5.76                           | 5.74                | 5.75                |
| $6^{\cdot+} \rightarrow 6^{2+}$    | 5.89                           | 5.89                | 5.87                |

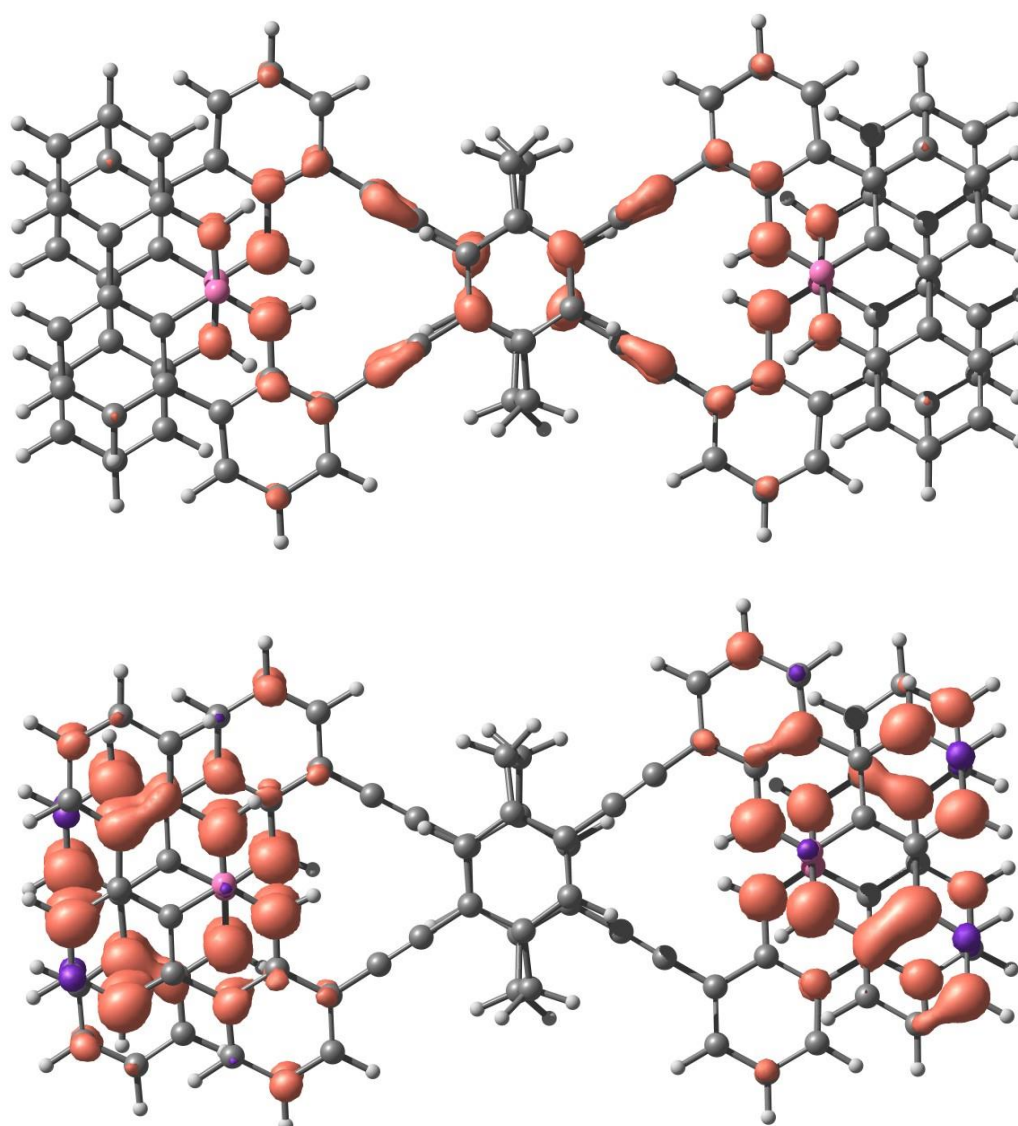

**Figure S66.** Spin densities (contour value 0.002) of the radical  $6^{\cdot+}$  (top) and the triplet diradical  $6^{2+}$  (bottom) as computed at the M06-2X/def2-TZVP//TPSS-D3(BJ)/def2-TZVP level of theory.

## 6. Cartesian Coordinates

### Conformer Analysis and Frontier Molecular Orbitals

All Cartesian coordinates given below were computed at the RI-TPSS-D3(BJ)/def2-QZVP level of theory and are given in Å and absolute energies are given in atomic units.

168

D2 isomer A, -4235.06445

|   |              |              |              |
|---|--------------|--------------|--------------|
| 6 | -0.065852000 | 1.415424000  | 1.372302000  |
| 6 | -1.216199000 | 0.652941000  | 1.520384000  |
| 6 | -1.182902000 | -0.756302000 | 1.511454000  |
| 6 | 0.065852000  | -1.415424000 | 1.372302000  |
| 6 | 1.216199000  | -0.652941000 | 1.520384000  |
| 6 | 1.182902000  | 0.756302000  | 1.511454000  |
| 1 | -2.182103000 | 1.143723000  | 1.467963000  |
| 1 | 2.182103000  | -1.143723000 | 1.467963000  |
| 6 | -0.158832000 | 2.801400000  | 0.784647000  |
| 1 | 0.539568000  | 3.491644000  | 1.263515000  |
| 1 | -1.171562000 | 3.181895000  | 0.931843000  |
| 6 | 0.158832000  | 2.801400000  | -0.784647000 |
| 1 | 1.171562000  | 3.181895000  | -0.931843000 |
| 1 | -0.539568000 | 3.491644000  | -1.263515000 |
| 6 | -0.065852000 | -1.415424000 | -1.372302000 |
| 6 | -1.216199000 | -0.652941000 | -1.520384000 |
| 6 | -1.182902000 | 0.756302000  | -1.511454000 |
| 6 | 0.065852000  | 1.415424000  | -1.372302000 |
| 6 | 1.216199000  | 0.652941000  | -1.520384000 |
| 6 | 1.182902000  | -0.756302000 | -1.511454000 |
| 1 | -2.182103000 | -1.143723000 | -1.467963000 |
| 1 | 2.182103000  | 1.143723000  | -1.467963000 |
| 6 | -0.158832000 | -2.801400000 | -0.784647000 |
| 6 | 0.158832000  | -2.801400000 | 0.784647000  |
| 1 | -0.539568000 | -3.491644000 | 1.263515000  |
| 1 | 1.171562000  | -3.181895000 | 0.931843000  |
| 1 | 0.539568000  | -3.491644000 | -1.263515000 |
| 1 | -1.171562000 | -3.181895000 | -0.931843000 |
| 6 | 2.389783000  | 1.484090000  | 1.437353000  |
| 6 | 3.415355000  | 2.136897000  | 1.340301000  |
| 6 | -2.389783000 | -1.484090000 | 1.437353000  |
| 6 | -3.415355000 | -2.136897000 | 1.340301000  |
| 6 | 2.389783000  | -1.484090000 | -1.437353000 |
| 6 | 3.415355000  | -2.136897000 | -1.340301000 |
| 6 | -2.389783000 | 1.484090000  | -1.437353000 |
| 6 | -3.415355000 | 2.136897000  | -1.340301000 |
| 6 | 7.015733000  | 4.290421000  | 1.157775000  |
| 6 | 5.807076000  | 4.965109000  | 1.022748000  |
| 6 | 4.611311000  | 4.259735000  | 1.078382000  |
| 6 | 4.621062000  | 2.868033000  | 1.259964000  |
| 1 | 7.935760000  | 4.858263000  | 1.109029000  |
| 1 | 5.798835000  | 6.039783000  | 0.880843000  |

|   |               |              |              |
|---|---------------|--------------|--------------|
| 1 | 3.658070000   | 4.768145000  | 0.990226000  |
| 6 | 7.086373000   | 2.900446000  | 1.342592000  |
| 6 | 5.863851000   | 2.177808000  | 1.380962000  |
| 7 | 5.851191000   | 0.806920000  | 1.531980000  |
| 6 | 8.373609000   | 2.200815000  | 1.475887000  |
| 1 | 4.918348000   | 0.405653000  | 1.549250000  |
| 5 | 7.057504000   | 0.039243000  | 1.613448000  |
| 6 | 8.378119000   | 0.789227000  | 1.597894000  |
| 6 | 9.589614000   | 0.061956000  | 1.698321000  |
| 7 | 7.095357000   | -1.380295000 | 1.717225000  |
| 1 | 6.266824000   | -1.961274000 | 1.685487000  |
| 6 | 9.536037000   | -1.402432000 | 1.800111000  |
| 6 | 8.290670000   | -2.085790000 | 1.801252000  |
| 6 | 8.254600000   | -3.486841000 | 1.878465000  |
| 6 | 9.423688000   | -4.225652000 | 1.951679000  |
| 6 | 10.659320000  | -3.570675000 | 1.957563000  |
| 6 | 10.699834000  | -2.187122000 | 1.884315000  |
| 1 | 7.289581000   | -3.984607000 | 1.865838000  |
| 1 | 9.374486000   | -5.308079000 | 2.006891000  |
| 1 | 11.581256000  | -4.138316000 | 2.016934000  |
| 1 | 11.664804000  | -1.695252000 | 1.882760000  |
| 6 | -7.015733000  | -4.290421000 | 1.157775000  |
| 6 | -4.621062000  | -2.868033000 | 1.259964000  |
| 6 | -4.611311000  | -4.259735000 | 1.078382000  |
| 6 | -5.807076000  | -4.965109000 | 1.022748000  |
| 1 | -7.935760000  | -4.858263000 | 1.109029000  |
| 1 | -3.658070000  | -4.768145000 | 0.990226000  |
| 1 | -5.798835000  | -6.039783000 | 0.880843000  |
| 6 | -5.863851000  | -2.177808000 | 1.380962000  |
| 6 | -7.086373000  | -2.900446000 | 1.342592000  |
| 6 | -8.373609000  | -2.200815000 | 1.475887000  |
| 5 | -7.057504000  | -0.039243000 | 1.613448000  |
| 6 | -8.378119000  | -0.789227000 | 1.597894000  |
| 6 | -9.589614000  | -0.061956000 | 1.698321000  |
| 6 | -8.290670000  | 2.085790000  | 1.801252000  |
| 6 | -9.536037000  | 1.402432000  | 1.800111000  |
| 6 | -10.699834000 | 2.187122000  | 1.884315000  |
| 6 | -10.659320000 | 3.570675000  | 1.957563000  |
| 6 | -9.423688000  | 4.225652000  | 1.951679000  |
| 6 | -8.254600000  | 3.486841000  | 1.878465000  |
| 1 | -11.664804000 | 1.695252000  | 1.882760000  |
| 1 | -11.581256000 | 4.138316000  | 2.016934000  |
| 1 | -9.374486000  | 5.308079000  | 2.006891000  |
| 1 | -7.289581000  | 3.984607000  | 1.865838000  |
| 6 | -4.621062000  | 2.868033000  | -1.259964000 |
| 6 | -4.611311000  | 4.259735000  | -1.078382000 |
| 6 | -5.807076000  | 4.965109000  | -1.022748000 |
| 6 | -7.015733000  | 4.290421000  | -1.157775000 |
| 1 | -5.798835000  | 6.039783000  | -0.880843000 |
| 1 | -7.935760000  | 4.858263000  | -1.109029000 |
| 1 | -3.658070000  | 4.768145000  | -0.990226000 |
| 6 | -7.086373000  | 2.900446000  | -1.342592000 |

|   |               |              |              |
|---|---------------|--------------|--------------|
| 6 | -5.863851000  | 2.177808000  | -1.380962000 |
| 7 | -5.851191000  | 0.806920000  | -1.531980000 |
| 6 | -8.373609000  | 2.200815000  | -1.475887000 |
| 1 | -4.918348000  | 0.405653000  | -1.549250000 |
| 6 | -8.378119000  | 0.789227000  | -1.597894000 |
| 5 | -7.057504000  | 0.039243000  | -1.613448000 |
| 7 | -7.095357000  | -1.380295000 | -1.717225000 |
| 6 | -9.589614000  | 0.061956000  | -1.698321000 |
| 1 | -6.266824000  | -1.961274000 | -1.685487000 |
| 6 | -8.290670000  | -2.085790000 | -1.801252000 |
| 6 | -9.536037000  | -1.402432000 | -1.800111000 |
| 6 | -10.699834000 | -2.187122000 | -1.884315000 |
| 6 | -10.659320000 | -3.570675000 | -1.957563000 |
| 6 | -9.423688000  | -4.225652000 | -1.951679000 |
| 6 | -8.254600000  | -3.486841000 | -1.878465000 |
| 1 | -11.664804000 | -1.695252000 | -1.882760000 |
| 1 | -11.581256000 | -4.138316000 | -2.016934000 |
| 1 | -9.374486000  | -5.308079000 | -2.006891000 |
| 1 | -7.289581000  | -3.984607000 | -1.865838000 |
| 6 | 7.015733000   | -4.290421000 | -1.157775000 |
| 6 | 4.621062000   | -2.868033000 | -1.259964000 |
| 6 | 4.611311000   | -4.259735000 | -1.078382000 |
| 6 | 5.807076000   | -4.965109000 | -1.022748000 |
| 1 | 7.935760000   | -4.858263000 | -1.109029000 |
| 1 | 3.658070000   | -4.768145000 | -0.990226000 |
| 1 | 5.798835000   | -6.039783000 | -0.880843000 |
| 6 | 5.863851000   | -2.177808000 | -1.380962000 |
| 6 | 7.086373000   | -2.900446000 | -1.342592000 |
| 6 | 8.373609000   | -2.200815000 | -1.475887000 |
| 7 | 5.851191000   | -0.806920000 | -1.531980000 |
| 1 | 4.918348000   | -0.405653000 | -1.549250000 |
| 5 | 7.057504000   | -0.039243000 | -1.613448000 |
| 6 | 8.378119000   | -0.789227000 | -1.597894000 |
| 6 | 9.589614000   | -0.061956000 | -1.698321000 |
| 7 | 7.095357000   | 1.380295000  | -1.717225000 |
| 1 | 6.266824000   | 1.961274000  | -1.685487000 |
| 6 | 9.536037000   | 1.402432000  | -1.800111000 |
| 6 | 8.290670000   | 2.085790000  | -1.801252000 |
| 6 | 8.254600000   | 3.486841000  | -1.878465000 |
| 6 | 9.423688000   | 4.225652000  | -1.951679000 |
| 6 | 10.659320000  | 3.570675000  | -1.957563000 |
| 6 | 10.699834000  | 2.187122000  | -1.884315000 |
| 1 | 7.289581000   | 3.984607000  | -1.865838000 |
| 1 | 9.374486000   | 5.308079000  | -2.006891000 |
| 1 | 11.581256000  | 4.138316000  | -2.016934000 |
| 1 | 11.664804000  | 1.695252000  | -1.882760000 |
| 7 | -5.851191000  | -0.806920000 | 1.531980000  |
| 1 | -4.918348000  | -0.405653000 | 1.549250000  |
| 7 | -7.095357000  | 1.380295000  | 1.717225000  |
| 1 | -6.266824000  | 1.961274000  | 1.685487000  |
| 6 | -9.600488000  | -2.877765000 | 1.472474000  |
| 6 | -10.797077000 | -0.776524000 | 1.681433000  |

|   |               |              |              |
|---|---------------|--------------|--------------|
| 6 | -10.789279000 | -2.162818000 | 1.573492000  |
| 1 | -11.748369000 | -0.262518000 | 1.746331000  |
| 1 | -11.732350000 | -2.699621000 | 1.556997000  |
| 1 | -9.646353000  | -3.954511000 | 1.373249000  |
| 6 | -10.797077000 | 0.776524000  | -1.681433000 |
| 6 | -9.600488000  | 2.877765000  | -1.472474000 |
| 6 | -10.789279000 | 2.162818000  | -1.573492000 |
| 1 | -11.748369000 | 0.262518000  | -1.746331000 |
| 1 | -9.646353000  | 3.954511000  | -1.373249000 |
| 1 | -11.732350000 | 2.699621000  | -1.556997000 |
| 6 | 9.600488000   | -2.877765000 | -1.472474000 |
| 6 | 10.797077000  | -0.776524000 | -1.681433000 |
| 6 | 10.789279000  | -2.162818000 | -1.573492000 |
| 1 | 11.748369000  | -0.262518000 | -1.746331000 |
| 1 | 11.732350000  | -2.699621000 | -1.556997000 |
| 1 | 9.646353000   | -3.954511000 | -1.373249000 |
| 6 | 10.797077000  | 0.776524000  | 1.681433000  |
| 6 | 9.600488000   | 2.877765000  | 1.472474000  |
| 6 | 10.789279000  | 2.162818000  | 1.573492000  |
| 1 | 11.748369000  | 0.262518000  | 1.746331000  |
| 1 | 11.732350000  | 2.699621000  | 1.556997000  |
| 1 | 9.646353000   | 3.954511000  | 1.373249000  |

168

C1 isomer B, -4235.05362

|   |              |              |              |
|---|--------------|--------------|--------------|
| 6 | -0.633456000 | 2.960374000  | 1.542574000  |
| 6 | -1.821785000 | 2.272905000  | 1.735093000  |
| 6 | -1.876296000 | 0.861591000  | 1.752749000  |
| 6 | -0.673031000 | 0.127742000  | 1.606821000  |
| 6 | 0.525404000  | 0.824098000  | 1.713402000  |
| 6 | 0.577729000  | 2.230635000  | 1.669536000  |
| 1 | -2.759995000 | 2.814803000  | 1.702085000  |
| 1 | 1.459342000  | 0.274706000  | 1.661434000  |
| 6 | -0.656252000 | 4.340692000  | 0.935671000  |
| 1 | 0.108935000  | 4.984627000  | 1.374514000  |
| 1 | -1.631786000 | 4.794213000  | 1.120321000  |
| 6 | -0.409410000 | 4.299853000  | -0.648630000 |
| 1 | 0.587522000  | 4.694860000  | -0.853608000 |
| 1 | -1.142253000 | 4.962448000  | -1.115061000 |
| 6 | -0.649016000 | 0.063889000  | -1.140470000 |
| 6 | -1.792174000 | 0.831687000  | -1.280802000 |
| 6 | -1.760027000 | 2.242387000  | -1.294192000 |
| 6 | -0.510124000 | 2.898683000  | -1.196931000 |
| 6 | 0.635864000  | 2.125513000  | -1.347278000 |
| 6 | 0.601139000  | 0.716190000  | -1.305309000 |
| 1 | -2.757605000 | 0.345481000  | -1.186786000 |
| 1 | 1.603743000  | 2.613993000  | -1.324010000 |
| 6 | -0.763532000 | -1.312988000 | -0.537096000 |
| 6 | -0.657014000 | -1.279249000 | 1.066031000  |
| 1 | -1.484385000 | -1.865695000 | 1.473557000  |
| 1 | 0.275954000  | -1.767875000 | 1.354450000  |
| 1 | 0.015803000  | -1.977938000 | -0.914089000 |

S81

|   |              |              |              |
|---|--------------|--------------|--------------|
| 1 | -1.732573000 | -1.740681000 | -0.806908000 |
| 6 | 1.816732000  | 2.896829000  | 1.553869000  |
| 6 | 2.850173000  | 3.528545000  | 1.410673000  |
| 6 | -3.161715000 | 0.272710000  | 1.749404000  |
| 6 | -4.337784000 | -0.051950000 | 1.773107000  |
| 6 | 1.805105000  | -0.017087000 | -1.237149000 |
| 6 | 2.823943000  | -0.681923000 | -1.151391000 |
| 6 | -3.004113000 | 2.901741000  | -1.180694000 |
| 6 | -4.143692000 | 3.302139000  | -1.006318000 |
| 6 | 6.417596000  | 5.714503000  | 1.039746000  |
| 6 | 5.195722000  | 6.368907000  | 0.924831000  |
| 6 | 4.012792000  | 5.650179000  | 1.044787000  |
| 6 | 4.047636000  | 4.264520000  | 1.268361000  |
| 1 | 7.327631000  | 6.292017000  | 0.942193000  |
| 1 | 5.167328000  | 7.438344000  | 0.749772000  |
| 1 | 3.050087000  | 6.143526000  | 0.975210000  |
| 6 | 6.513403000  | 4.332160000  | 1.265695000  |
| 6 | 5.302832000  | 3.594737000  | 1.365915000  |
| 7 | 5.314878000  | 2.228367000  | 1.553998000  |
| 6 | 7.814187000  | 3.654662000  | 1.378350000  |
| 1 | 4.389235000  | 1.814302000  | 1.611485000  |
| 5 | 6.534500000  | 1.479758000  | 1.613324000  |
| 6 | 7.843019000  | 2.246946000  | 1.535118000  |
| 6 | 9.067746000  | 1.539379000  | 1.614661000  |
| 7 | 6.596552000  | 0.063986000  | 1.750455000  |
| 1 | 5.775866000  | -0.528803000 | 1.759745000  |
| 6 | 9.038868000  | 0.077013000  | 1.749790000  |
| 6 | 7.804151000  | -0.623029000 | 1.808354000  |
| 6 | 7.790777000  | -2.022486000 | 1.916279000  |
| 6 | 8.972163000  | -2.743694000 | 1.963911000  |
| 6 | 10.197799000 | -2.072036000 | 1.912790000  |
| 6 | 10.215982000 | -0.689874000 | 1.809889000  |
| 1 | 6.833063000  | -2.533092000 | 1.948392000  |
| 1 | 8.940546000  | -3.825253000 | 2.043512000  |
| 1 | 11.129272000 | -2.625776000 | 1.951378000  |
| 1 | 11.173377000 | -0.185265000 | 1.764450000  |
| 6 | -8.433063000 | -0.931611000 | 2.066312000  |
| 6 | -5.715955000 | -0.354511000 | 1.857629000  |
| 6 | -6.636221000 | 0.663859000  | 2.149620000  |
| 6 | -7.989345000 | 0.370308000  | 2.257153000  |
| 1 | -9.494697000 | -1.130846000 | 2.132263000  |
| 1 | -6.272038000 | 1.675378000  | 2.280973000  |
| 1 | -8.700281000 | 1.159789000  | 2.469065000  |
| 6 | -6.175100000 | -1.685884000 | 1.657222000  |
| 6 | -7.557881000 | -1.986715000 | 1.760851000  |
| 6 | -8.042949000 | -3.357030000 | 1.539235000  |
| 5 | -5.637994000 | -4.018747000 | 1.095167000  |
| 6 | -7.113186000 | -4.368607000 | 1.195903000  |
| 6 | -7.529103000 | -5.699290000 | 0.946912000  |
| 6 | -5.149110000 | -6.349971000 | 0.459308000  |
| 6 | -6.526000000 | -6.694512000 | 0.540563000  |
| 6 | -6.880288000 | -8.010052000 | 0.190483000  |

|   |              |              |              |
|---|--------------|--------------|--------------|
| 6 | -5.945165000 | -8.951462000 | -0.213008000 |
| 6 | -4.593866000 | -8.596777000 | -0.278112000 |
| 6 | -4.206262000 | -7.309098000 | 0.055450000  |
| 1 | -7.923708000 | -8.298760000 | 0.228416000  |
| 1 | -6.262930000 | -9.953857000 | -0.476661000 |
| 1 | -3.849272000 | -9.320882000 | -0.591058000 |
| 1 | -3.159115000 | -7.021723000 | 0.003389000  |
| 6 | -5.529553000 | 3.492244000  | -0.808806000 |
| 6 | -6.103354000 | 4.716658000  | -0.445045000 |
| 6 | -7.475241000 | 4.805086000  | -0.230608000 |
| 6 | -8.278673000 | 3.678141000  | -0.374156000 |
| 1 | -7.920078000 | 5.752572000  | 0.051179000  |
| 1 | -9.342872000 | 3.776309000  | -0.196213000 |
| 1 | -5.464142000 | 5.584337000  | -0.330765000 |
| 6 | -7.760691000 | 2.424459000  | -0.739591000 |
| 6 | -6.361513000 | 2.338398000  | -0.965711000 |
| 7 | -5.774163000 | 1.148868000  | -1.328595000 |
| 6 | -8.610453000 | 1.228010000  | -0.870134000 |
| 1 | -4.768102000 | 1.217778000  | -1.443413000 |
| 6 | -8.012933000 | -0.006842000 | -1.225456000 |
| 5 | -6.514932000 | -0.063596000 | -1.459804000 |
| 7 | -5.931589000 | -1.318191000 | -1.796364000 |
| 6 | -8.774241000 | -1.196780000 | -1.338861000 |
| 1 | -4.940502000 | -1.443821000 | -1.957987000 |
| 6 | -6.688857000 | -2.479362000 | -1.909987000 |
| 6 | -8.093726000 | -2.447824000 | -1.702967000 |
| 6 | -8.790585000 | -3.661491000 | -1.848316000 |
| 6 | -8.154579000 | -4.849218000 | -2.169923000 |
| 6 | -6.768864000 | -4.864622000 | -2.355951000 |
| 6 | -6.049476000 | -3.689003000 | -2.225482000 |
| 1 | -9.861470000 | -3.674042000 | -1.689989000 |
| 1 | -8.727528000 | -5.764859000 | -2.255693000 |
| 1 | -6.255247000 | -5.791327000 | -2.585137000 |
| 1 | -4.971510000 | -3.688124000 | -2.364536000 |
| 6 | 6.417975000  | -2.851657000 | -1.047824000 |
| 6 | 4.027142000  | -1.419570000 | -1.095670000 |
| 6 | 4.018502000  | -2.805449000 | -0.874214000 |
| 6 | 5.212362000  | -3.515727000 | -0.846892000 |
| 1 | 7.336747000  | -3.422802000 | -1.018547000 |
| 1 | 3.067483000  | -3.305950000 | -0.733051000 |
| 1 | 5.205114000  | -4.585992000 | -0.674809000 |
| 6 | 5.267173000  | -0.740092000 | -1.285552000 |
| 6 | 6.487429000  | -1.467703000 | -1.273240000 |
| 6 | 7.771645000  | -0.777627000 | -1.470207000 |
| 7 | 5.253867000  | 0.625561000  | -1.475099000 |
| 1 | 4.322850000  | 1.031316000  | -1.466211000 |
| 5 | 6.459346000  | 1.385871000  | -1.614943000 |
| 6 | 7.777009000  | 0.630717000  | -1.624998000 |
| 6 | 8.986993000  | 1.350495000  | -1.781878000 |
| 7 | 6.497849000  | 2.802168000  | -1.754549000 |
| 1 | 5.672816000  | 3.387075000  | -1.707834000 |
| 6 | 8.934901000  | 2.812607000  | -1.913420000 |



|   |               |              |              |
|---|---------------|--------------|--------------|
| 6 | 7.692333000   | 3.500768000  | -1.890967000 |
| 6 | 7.658447000   | 4.900023000  | -1.997807000 |
| 6 | 8.827253000   | 5.632505000  | -2.122543000 |
| 6 | 10.059934000  | 4.972689000  | -2.151233000 |
| 6 | 10.098079000  | 3.590815000  | -2.049792000 |
| 1 | 6.695705000   | 5.401444000  | -1.968205000 |
| 1 | 8.780082000   | 6.713631000  | -2.200444000 |
| 1 | 10.981493000  | 5.535249000  | -2.250875000 |
| 1 | 11.061098000  | 3.095412000  | -2.066944000 |
| 7 | -5.250988000  | -2.668333000 | 1.356363000  |
| 1 | -4.294470000  | -2.328941000 | 1.326007000  |
| 7 | -4.722676000  | -5.062247000 | 0.764795000  |
| 1 | -3.723621000  | -4.920212000 | 0.685511000  |
| 6 | -9.399228000  | -3.701797000 | 1.641559000  |
| 6 | -8.891839000  | -6.008050000 | 1.076176000  |
| 6 | -9.803517000  | -5.014777000 | 1.417914000  |
| 1 | -9.253837000  | -7.015262000 | 0.909153000  |
| 1 | -10.854923000 | -5.268718000 | 1.510179000  |
| 1 | -10.145826000 | -2.959989000 | 1.897001000  |
| 6 | -10.151673000 | -1.131232000 | -1.077141000 |
| 6 | -9.992532000  | 1.252903000  | -0.629184000 |
| 6 | -10.739210000 | 0.082333000  | -0.730324000 |
| 1 | -10.772465000 | -2.016473000 | -1.137685000 |
| 1 | -10.496305000 | 2.172023000  | -0.354683000 |
| 1 | -11.806315000 | 0.117076000  | -0.533635000 |
| 6 | 8.995510000   | -1.459739000 | -1.493807000 |
| 6 | 10.191796000  | 0.631311000  | -1.789430000 |
| 6 | 10.182726000  | -0.752344000 | -1.651014000 |
| 1 | 11.142213000  | 1.139582000  | -1.897531000 |
| 1 | 11.123867000  | -1.292691000 | -1.654769000 |
| 1 | 9.040804000   | -2.534263000 | -1.372541000 |
| 6 | 10.263488000  | 2.270221000  | 1.544619000  |
| 6 | 9.030354000   | 4.348594000  | 1.321561000  |
| 6 | 10.232088000  | 3.653330000  | 1.404136000  |
| 1 | 11.223731000  | 1.771234000  | 1.592761000  |
| 1 | 11.166106000  | 4.202854000  | 1.346572000  |
| 1 | 9.057136000   | 5.423133000  | 1.195471000  |

168

C2 isomer C, -4235.04450

|   |              |              |             |
|---|--------------|--------------|-------------|
| 6 | 0.801970000  | 1.166447000  | 1.306301000 |
| 6 | -0.574094000 | 1.255255000  | 1.460026000 |
| 6 | -1.400158000 | 0.111257000  | 1.459382000 |
| 6 | -0.801970000 | -1.166447000 | 1.306301000 |
| 6 | 0.574094000  | -1.255255000 | 1.460026000 |
| 6 | 1.400158000  | -0.111257000 | 1.459382000 |
| 1 | -1.056312000 | 2.225982000  | 1.421161000 |
| 1 | 1.056312000  | -2.225982000 | 1.421161000 |
| 6 | 1.572543000  | 2.323682000  | 0.719489000 |
| 1 | 2.642212000  | 2.155109000  | 0.865232000 |
| 1 | 1.312638000  | 3.263538000  | 1.213069000 |

S84

|   |              |              |              |
|---|--------------|--------------|--------------|
| 6 | 1.289152000  | 2.496054000  | -0.849102000 |
| 1 | 2.240256000  | 2.713728000  | -1.343168000 |
| 1 | 0.634813000  | 3.357446000  | -0.992821000 |
| 6 | -0.640705000 | -1.266967000 | -1.438765000 |
| 6 | -1.372134000 | -0.098510000 | -1.586737000 |
| 6 | -0.768028000 | 1.177065000  | -1.569338000 |
| 6 | 0.640705000  | 1.266967000  | -1.438765000 |
| 6 | 1.372134000  | 0.098510000  | -1.586737000 |
| 6 | 0.768028000  | -1.177065000 | -1.569338000 |
| 1 | -2.454518000 | -0.147182000 | -1.522841000 |
| 1 | 2.454518000  | 0.147182000  | -1.522841000 |
| 6 | -1.289152000 | -2.496054000 | -0.849102000 |
| 6 | -1.572543000 | -2.323682000 | 0.719489000  |
| 1 | -2.642212000 | -2.155109000 | 0.865232000  |
| 1 | -1.312638000 | -3.263538000 | 1.213069000  |
| 1 | -0.634813000 | -3.357446000 | -0.992821000 |
| 1 | -2.240256000 | -2.713728000 | -1.343168000 |
| 6 | 2.799883000  | -0.307690000 | 1.475155000  |
| 6 | 3.977815000  | -0.614774000 | 1.557848000  |
| 6 | -2.799883000 | 0.307690000  | 1.475155000  |
| 6 | -3.977815000 | 0.614774000  | 1.557848000  |
| 6 | 1.624846000  | -2.295644000 | -1.470065000 |
| 6 | 2.463128000  | -3.169334000 | -1.320777000 |
| 6 | -1.624846000 | 2.295644000  | -1.470065000 |
| 6 | -2.463128000 | 3.169334000  | -1.320777000 |
| 6 | 7.992026000  | -1.734198000 | 2.070586000  |
| 6 | 6.993867000  | -2.696731000 | 2.141976000  |
| 6 | 5.665481000  | -2.334185000 | 1.960315000  |
| 6 | 5.330184000  | -0.994757000 | 1.712639000  |
| 1 | 9.020801000  | -2.046378000 | 2.193092000  |
| 1 | 7.252803000  | -3.733810000 | 2.318453000  |
| 1 | 4.874443000  | -3.073371000 | 1.998604000  |
| 6 | 7.714594000  | -0.381316000 | 1.816137000  |
| 6 | 6.356680000  | -0.011558000 | 1.637175000  |
| 7 | 6.001464000  | 1.299607000  | 1.384583000  |
| 6 | 8.781296000  | 0.626698000  | 1.724348000  |
| 1 | 4.998970000  | 1.437246000  | 1.299312000  |
| 5 | 6.973975000  | 2.337160000  | 1.250311000  |
| 6 | 8.436456000  | 1.969421000  | 1.433571000  |
| 6 | 9.424943000  | 2.976149000  | 1.313730000  |
| 7 | 6.655141000  | 3.699825000  | 0.973896000  |
| 1 | 5.708044000  | 4.032983000  | 0.845470000  |
| 6 | 9.011129000  | 4.341836000  | 0.959166000  |
| 6 | 7.637112000  | 4.667359000  | 0.795524000  |
| 6 | 7.260455000  | 5.972084000  | 0.438417000  |
| 6 | 8.210116000  | 6.959920000  | 0.234354000  |
| 6 | 9.567043000  | 6.657098000  | 0.385419000  |
| 6 | 9.944952000  | 5.371125000  | 0.741565000  |
| 1 | 6.203284000  | 6.195637000  | 0.319354000  |
| 1 | 7.897219000  | 7.960581000  | -0.043613000 |
| 1 | 10.320775000 | 7.419836000  | 0.225231000  |
| 1 | 11.000899000 | 5.152555000  | 0.848044000  |

|   |               |              |              |
|---|---------------|--------------|--------------|
| 6 | -7.992026000  | 1.734198000  | 2.070586000  |
| 6 | -5.330184000  | 0.994757000  | 1.712639000  |
| 6 | -5.665481000  | 2.334185000  | 1.960315000  |
| 6 | -6.993867000  | 2.696731000  | 2.141976000  |
| 1 | -9.020801000  | 2.046378000  | 2.193092000  |
| 1 | -4.874443000  | 3.073371000  | 1.998604000  |
| 1 | -7.252803000  | 3.733810000  | 2.318453000  |
| 6 | -6.356680000  | 0.011558000  | 1.637175000  |
| 6 | -7.714594000  | 0.381316000  | 1.816137000  |
| 6 | -8.781296000  | -0.626698000 | 1.724348000  |
| 5 | -6.973975000  | -2.337160000 | 1.250311000  |
| 6 | -8.436456000  | -1.969421000 | 1.433571000  |
| 6 | -9.424943000  | -2.976149000 | 1.313730000  |
| 6 | -7.637112000  | -4.667359000 | 0.795524000  |
| 6 | -9.011129000  | -4.341836000 | 0.959166000  |
| 6 | -9.944952000  | -5.371125000 | 0.741565000  |
| 6 | -9.567043000  | -6.657098000 | 0.385419000  |
| 6 | -8.210116000  | -6.959920000 | 0.234354000  |
| 6 | -7.260455000  | -5.972084000 | 0.438417000  |
| 1 | -11.000899000 | -5.152555000 | 0.848044000  |
| 1 | -10.320775000 | -7.419836000 | 0.225231000  |
| 1 | -7.897219000  | -7.960581000 | -0.043613000 |
| 1 | -6.203284000  | -6.195637000 | 0.319354000  |
| 6 | -3.595306000  | 3.993252000  | -1.133738000 |
| 6 | -3.514600000  | 5.357535000  | -0.828107000 |
| 6 | -4.676348000  | 6.091894000  | -0.612714000 |
| 6 | -5.918784000  | 5.471148000  | -0.692713000 |
| 1 | -4.614642000  | 7.148176000  | -0.377143000 |
| 1 | -6.806221000  | 6.064447000  | -0.509250000 |
| 1 | -2.538937000  | 5.824490000  | -0.758424000 |
| 6 | -6.061540000  | 4.107300000  | -0.996080000 |
| 6 | -4.875242000  | 3.364141000  | -1.233908000 |
| 7 | -4.926864000  | 2.025566000  | -1.545401000 |
| 6 | -7.375824000  | 3.443610000  | -1.035054000 |
| 1 | -4.010131000  | 1.605579000  | -1.662723000 |
| 6 | -7.438964000  | 2.056668000  | -1.317399000 |
| 5 | -6.153173000  | 1.296573000  | -1.584334000 |
| 7 | -6.238709000  | -0.099086000 | -1.851979000 |
| 6 | -8.669532000  | 1.353956000  | -1.322099000 |
| 1 | -5.428889000  | -0.680468000 | -2.025713000 |
| 6 | -7.451595000  | -0.779947000 | -1.853311000 |
| 6 | -8.667384000  | -0.088284000 | -1.606445000 |
| 6 | -9.852269000  | -0.846659000 | -1.628562000 |
| 6 | -9.856438000  | -2.210596000 | -1.870355000 |
| 6 | -8.648931000  | -2.877385000 | -2.099255000 |
| 6 | -7.462597000  | -2.163741000 | -2.089464000 |
| 1 | -10.795766000 | -0.352465000 | -1.434068000 |
| 1 | -10.790408000 | -2.760145000 | -1.860386000 |
| 1 | -8.635590000  | -3.948253000 | -2.267219000 |
| 1 | -6.516801000  | -2.671058000 | -2.259976000 |
| 6 | 5.918784000   | -5.471148000 | -0.692713000 |
| 6 | 3.595306000   | -3.993252000 | -1.133738000 |

|   |               |              |              |
|---|---------------|--------------|--------------|
| 6 | 3.514600000   | -5.357535000 | -0.828107000 |
| 6 | 4.676348000   | -6.091894000 | -0.612714000 |
| 1 | 6.806221000   | -6.064447000 | -0.509250000 |
| 1 | 2.538937000   | -5.824490000 | -0.758424000 |
| 1 | 4.614642000   | -7.148176000 | -0.377143000 |
| 6 | 4.875242000   | -3.364141000 | -1.233908000 |
| 6 | 6.061540000   | -4.107300000 | -0.996080000 |
| 6 | 7.375824000   | -3.443610000 | -1.035054000 |
| 7 | 4.926864000   | -2.025566000 | -1.545401000 |
| 1 | 4.010131000   | -1.605579000 | -1.662723000 |
| 5 | 6.153173000   | -1.296573000 | -1.584334000 |
| 6 | 7.438964000   | -2.056668000 | -1.317399000 |
| 6 | 8.669532000   | -1.353956000 | -1.322099000 |
| 7 | 6.238709000   | 0.099086000  | -1.851979000 |
| 1 | 5.428889000   | 0.680468000  | -2.025713000 |
| 6 | 8.667384000   | 0.088284000  | -1.606445000 |
| 6 | 7.451595000   | 0.779947000  | -1.853311000 |
| 6 | 7.462597000   | 2.163741000  | -2.089464000 |
| 6 | 8.648931000   | 2.877385000  | -2.099255000 |
| 6 | 9.856438000   | 2.210596000  | -1.870355000 |
| 6 | 9.852269000   | 0.846659000  | -1.628562000 |
| 1 | 6.516801000   | 2.671058000  | -2.259976000 |
| 1 | 8.635590000   | 3.948253000  | -2.267219000 |
| 1 | 10.790408000  | 2.760145000  | -1.860386000 |
| 1 | 10.795766000  | 0.352465000  | -1.434068000 |
| 7 | -6.001464000  | -1.299607000 | 1.384583000  |
| 1 | -4.998970000  | -1.437246000 | 1.299312000  |
| 7 | -6.655141000  | -3.699825000 | 0.973896000  |
| 1 | -5.708044000  | -4.032983000 | 0.845470000  |
| 6 | -10.135580000 | -0.308342000 | 1.903010000  |
| 6 | -10.767183000 | -2.620781000 | 1.516681000  |
| 6 | -11.104429000 | -1.302691000 | 1.805212000  |
| 1 | -11.556794000 | -3.359214000 | 1.446924000  |
| 1 | -12.147796000 | -1.042962000 | 1.955293000  |
| 1 | -10.445787000 | 0.706224000  | 2.119669000  |
| 6 | -9.842587000  | 2.067220000  | -1.030889000 |
| 6 | -8.573257000  | 4.122917000  | -0.764792000 |
| 6 | -9.781442000  | 3.431751000  | -0.762376000 |
| 1 | -10.804932000 | 1.570640000  | -1.008003000 |
| 1 | -8.577476000  | 5.183518000  | -0.543907000 |
| 1 | -10.698491000 | 3.969757000  | -0.542710000 |
| 6 | 8.573257000   | -4.122917000 | -0.764792000 |
| 6 | 9.842587000   | -2.067220000 | -1.030889000 |
| 6 | 9.781442000   | -3.431751000 | -0.762376000 |
| 1 | 10.804932000  | -1.570640000 | -1.008003000 |
| 1 | 10.698491000  | -3.969757000 | -0.542710000 |
| 1 | 8.577476000   | -5.183518000 | -0.543907000 |
| 6 | 10.767183000  | 2.620781000  | 1.516681000  |
| 6 | 10.135580000  | 0.308342000  | 1.903010000  |
| 6 | 11.104429000  | 1.302691000  | 1.805212000  |
| 1 | 11.556794000  | 3.359214000  | 1.446924000  |
| 1 | 12.147796000  | 1.042962000  | 1.955293000  |

|   |              |              |             |
|---|--------------|--------------|-------------|
| 1 | 10.445787000 | -0.706224000 | 2.119669000 |
|---|--------------|--------------|-------------|

168

C2 isomer D, -4235.03511

|   |              |              |              |
|---|--------------|--------------|--------------|
| 6 | 1.794303000  | 0.880341000  | -1.318253000 |
| 6 | 1.165638000  | 1.253700000  | -2.505352000 |
| 6 | -0.198403000 | 1.644054000  | -2.535748000 |
| 6 | -0.923777000 | 1.739545000  | -1.311942000 |
| 6 | -0.197528000 | 1.661551000  | -0.118047000 |
| 6 | 1.143085000  | 1.201427000  | -0.088630000 |
| 1 | 1.663417000  | 1.063794000  | -3.462529000 |
| 1 | -0.723484000 | 1.781931000  | 0.835286000  |
| 6 | 2.941912000  | -0.103739000 | -1.363953000 |
| 1 | 3.649306000  | 0.070793000  | -0.533876000 |
| 1 | 3.492480000  | 0.038934000  | -2.310706000 |
| 6 | 2.434173000  | -1.627522000 | -1.278927000 |
| 1 | 2.813154000  | -2.065532000 | -0.338474000 |
| 1 | 2.884262000  | -2.190340000 | -2.117701000 |
| 6 | -1.794303000 | -0.880341000 | -1.318253000 |
| 6 | -1.165638000 | -1.253700000 | -2.505352000 |
| 6 | 0.198403000  | -1.644054000 | -2.535748000 |
| 6 | 0.923777000  | -1.739545000 | -1.311942000 |
| 6 | 0.197528000  | -1.661551000 | -0.118047000 |
| 6 | -1.143085000 | -1.201427000 | -0.088630000 |
| 1 | -1.663417000 | -1.063794000 | -3.462529000 |
| 1 | 0.723484000  | -1.781931000 | 0.835286000  |
| 6 | -2.941912000 | 0.103739000  | -1.363953000 |
| 6 | -2.434173000 | 1.627522000  | -1.278927000 |
| 1 | -2.884262000 | 2.190340000  | -2.117701000 |
| 1 | -2.813154000 | 2.065532000  | -0.338474000 |
| 1 | -3.649306000 | -0.070793000 | -0.533876000 |
| 1 | -3.492480000 | -0.038934000 | -2.310706000 |
| 6 | 1.757238000  | 0.857400000  | 1.143421000  |
| 6 | 2.320286000  | 0.467227000  | 2.167553000  |
| 6 | -0.827582000 | 1.678763000  | -3.808582000 |
| 6 | -1.237757000 | 1.542333000  | -4.962150000 |
| 6 | -1.757238000 | -0.857400000 | 1.143421000  |
| 6 | -2.320286000 | -0.467227000 | 2.167553000  |
| 6 | 0.827582000  | -1.678763000 | -3.808582000 |
| 6 | 1.237757000  | -1.542333000 | -4.962150000 |
| 6 | 4.286110000  | -0.758217000 | 5.699334000  |
| 6 | 4.806931000  | -1.131443000 | 4.454476000  |
| 6 | 4.160812000  | -0.729491000 | 3.282527000  |
| 6 | 2.975116000  | 0.035221000  | 3.351031000  |
| 1 | 4.812132000  | -1.077912000 | 6.603761000  |
| 1 | 5.725051000  | -1.727781000 | 4.401426000  |
| 1 | 4.561068000  | -0.993722000 | 2.297515000  |
| 6 | 3.107409000  | 0.007949000  | 5.829384000  |
| 6 | 2.429574000  | 0.390132000  | 4.629501000  |
| 7 | 1.247290000  | 1.102524000  | 4.676303000  |
| 6 | 2.571618000  | 0.394623000  | 7.150154000  |

S88

|   |               |              |              |
|---|---------------|--------------|--------------|
| 1 | 0.849570000   | 1.313995000  | 3.756601000  |
| 5 | 0.618129000   | 1.462421000  | 5.917495000  |
| 6 | 1.336443000   | 1.100249000  | 7.212401000  |
| 6 | 0.751217000   | 1.469038000  | 8.457011000  |
| 7 | -0.632546000  | 2.148022000  | 6.007455000  |
| 1 | -1.199982000  | 2.380697000  | 5.190772000  |
| 6 | -0.542674000  | 2.177174000  | 8.457241000  |
| 6 | -1.203736000  | 2.493259000  | 7.229418000  |
| 6 | -2.450487000  | 3.156677000  | 7.245943000  |
| 6 | -3.060675000  | 3.507515000  | 8.449184000  |
| 6 | -2.424864000  | 3.206275000  | 9.666710000  |
| 6 | -1.190628000  | 2.556055000  | 9.655313000  |
| 1 | -2.935988000  | 3.385818000  | 6.289008000  |
| 1 | -4.030790000  | 4.019595000  | 8.439031000  |
| 1 | -2.892727000  | 3.477540000  | 10.620409000 |
| 1 | -0.713283000  | 2.324325000  | 10.612507000 |
| 6 | -2.797364000  | 0.670784000  | -8.786915000 |
| 6 | -1.755402000  | 1.293439000  | -6.260623000 |
| 6 | -0.957781000  | 1.444886000  | -7.413183000 |
| 6 | -1.484418000  | 1.138668000  | -8.672355000 |
| 1 | -3.180474000  | 0.428276000  | -9.783159000 |
| 1 | 0.074539000   | 1.790736000  | -7.302575000 |
| 1 | -0.863298000  | 1.254642000  | -9.567585000 |
| 6 | -3.102866000  | 0.818408000  | -6.383138000 |
| 6 | -3.639185000  | 0.491366000  | -7.665222000 |
| 6 | -5.016986000  | -0.031638000 | -7.789153000 |
| 5 | -5.197025000  | 0.147425000  | -5.256018000 |
| 6 | -5.795848000  | -0.220923000 | -6.610139000 |
| 6 | -7.122234000  | -0.740763000 | -6.664509000 |
| 6 | -7.289661000  | -0.573679000 | -4.147629000 |
| 6 | -7.873461000  | -0.924987000 | -5.405741000 |
| 6 | -9.185919000  | -1.453886000 | -5.382755000 |
| 6 | -9.900684000  | -1.635574000 | -4.198150000 |
| 6 | -9.309839000  | -1.284840000 | -2.971124000 |
| 6 | -8.018499000  | -0.760138000 | -2.952089000 |
| 1 | -9.661608000  | -1.734383000 | -6.328066000 |
| 1 | -10.914917000 | -2.050299000 | -4.228162000 |
| 1 | -9.856162000  | -1.422455000 | -2.030133000 |
| 1 | -7.546155000  | -0.485478000 | -1.999331000 |
| 6 | 1.755402000   | -1.293439000 | -6.260623000 |
| 6 | 0.957781000   | -1.444886000 | -7.413183000 |
| 6 | 1.484418000   | -1.138668000 | -8.672355000 |
| 6 | 2.797364000   | -0.670784000 | -8.786915000 |
| 1 | 0.863298000   | -1.254642000 | -9.567585000 |
| 1 | 3.180474000   | -0.428276000 | -9.783159000 |
| 1 | -0.074539000  | -1.790736000 | -7.302575000 |
| 6 | 3.639185000   | -0.491366000 | -7.665222000 |
| 6 | 3.102866000   | -0.818408000 | -6.383138000 |
| 7 | 3.857788000   | -0.662030000 | -5.233160000 |
| 6 | 5.016986000   | 0.031638000  | -7.789153000 |
| 1 | 3.363388000   | -0.938163000 | -4.379564000 |
| 6 | 5.795848000   | 0.220923000  | -6.610139000 |

|   |              |              |               |
|---|--------------|--------------|---------------|
| 5 | 5.197025000  | -0.147425000 | -5.256018000  |
| 7 | 6.000149000  | 0.047410000  | -4.087633000  |
| 6 | 7.122234000  | 0.740763000  | -6.664509000  |
| 1 | 5.675772000  | -0.178462000 | -3.145761000  |
| 6 | 7.289661000  | 0.573679000  | -4.147629000  |
| 6 | 7.873461000  | 0.924987000  | -5.405741000  |
| 6 | 9.185919000  | 1.453886000  | -5.382755000  |
| 6 | 9.900684000  | 1.635574000  | -4.198150000  |
| 6 | 9.309839000  | 1.284840000  | -2.971124000  |
| 6 | 8.018499000  | 0.760138000  | -2.952089000  |
| 1 | 9.661608000  | 1.734383000  | -6.328066000  |
| 1 | 10.914917000 | 2.050299000  | -4.228162000  |
| 1 | 9.856162000  | 1.422455000  | -2.030133000  |
| 1 | 7.546155000  | 0.485478000  | -1.999331000  |
| 6 | -4.286110000 | 0.758217000  | 5.699334000   |
| 6 | -2.975116000 | -0.035221000 | 3.351031000   |
| 6 | -4.160812000 | 0.729491000  | 3.282527000   |
| 6 | -4.806931000 | 1.131443000  | 4.454476000   |
| 1 | -4.812132000 | 1.077912000  | 6.603761000   |
| 1 | -4.561068000 | 0.993722000  | 2.297515000   |
| 1 | -5.725051000 | 1.727781000  | 4.401426000   |
| 6 | -2.429574000 | -0.390132000 | 4.629501000   |
| 6 | -3.107409000 | -0.007949000 | 5.829384000   |
| 6 | -2.571618000 | -0.394623000 | 7.150154000   |
| 7 | -1.247290000 | -1.102524000 | 4.676303000   |
| 1 | -0.849570000 | -1.313995000 | 3.756601000   |
| 5 | -0.618129000 | -1.462421000 | 5.917495000   |
| 6 | -1.336443000 | -1.100249000 | 7.212401000   |
| 6 | -0.751217000 | -1.469038000 | 8.457011000   |
| 7 | 0.632546000  | -2.148022000 | 6.007455000   |
| 1 | 1.199982000  | -2.380697000 | 5.190772000   |
| 6 | 0.542674000  | -2.177174000 | 8.457241000   |
| 6 | 1.203736000  | -2.493259000 | 7.229418000   |
| 6 | 2.450487000  | -3.156677000 | 7.245943000   |
| 6 | 3.060675000  | -3.507515000 | 8.449184000   |
| 6 | 2.424864000  | -3.206275000 | 9.666710000   |
| 6 | 1.190628000  | -2.556055000 | 9.655313000   |
| 1 | 2.935988000  | -3.385818000 | 6.289008000   |
| 1 | 4.030790000  | -4.019595000 | 8.439031000   |
| 1 | 2.892727000  | -3.477540000 | 10.620409000  |
| 1 | 0.713283000  | -2.324325000 | 10.612507000  |
| 7 | -3.857788000 | 0.662030000  | -5.233160000  |
| 1 | -3.363388000 | 0.938163000  | -4.379564000  |
| 7 | -6.000149000 | -0.047410000 | -4.087633000  |
| 1 | -5.675772000 | 0.178462000  | -3.145761000  |
| 6 | -5.596146000 | -0.363370000 | -9.032693000  |
| 6 | -7.661127000 | -1.061527000 | -7.929582000  |
| 6 | -6.900713000 | -0.868791000 | -9.088617000  |
| 1 | -8.675423000 | -1.461871000 | -8.025143000  |
| 1 | -7.336324000 | -1.120820000 | -10.063686000 |
| 1 | -5.041600000 | -0.232535000 | -9.967506000  |
| 6 | 7.661127000  | 1.061527000  | -7.929582000  |

|   |              |              |               |
|---|--------------|--------------|---------------|
| 6 | 5.596146000  | 0.363370000  | -9.032693000  |
| 6 | 6.900713000  | 0.868791000  | -9.088617000  |
| 1 | 8.675423000  | 1.461871000  | -8.025143000  |
| 1 | 5.041600000  | 0.232535000  | -9.967506000  |
| 1 | 7.336324000  | 1.120820000  | -10.063686000 |
| 6 | -3.227263000 | -0.077579000 | 8.357323000   |
| 6 | -1.434682000 | -1.123726000 | 9.642347000   |
| 6 | -2.655040000 | -0.442633000 | 9.580694000   |
| 1 | -1.021761000 | -1.377420000 | 10.623876000  |
| 1 | -3.170253000 | -0.177793000 | 10.511903000  |
| 1 | -4.176253000 | 0.465717000  | 8.361656000   |
| 6 | 1.434682000  | 1.123726000  | 9.642347000   |
| 6 | 3.227263000  | 0.077579000  | 8.357323000   |
| 6 | 2.655040000  | 0.442633000  | 9.580694000   |
| 1 | 1.021761000  | 1.377420000  | 10.623876000  |
| 1 | 3.170253000  | 0.177793000  | 10.511903000  |
| 1 | 4.176253000  | -0.465717000 | 8.361656000   |

72

"monomer", C1, -1752.14796

|   |             |              |              |
|---|-------------|--------------|--------------|
| C | 3.336877000 | -1.575664000 | -1.409804000 |
| C | 2.274375000 | -0.683363000 | -1.462938000 |
| C | 2.462272000 | 0.707835000  | -1.349946000 |
| C | 3.774866000 | 1.216169000  | -1.193331000 |
| C | 4.833348000 | 0.347515000  | -1.437006000 |
| C | 4.642433000 | -1.043385000 | -1.542694000 |
| H | 1.261383000 | -1.069994000 | -1.423088000 |
| H | 5.849867000 | 0.721162000  | -1.381716000 |
| C | 3.096559000 | -2.983999000 | -0.926571000 |
| H | 3.733858000 | -3.703137000 | -1.445165000 |
| H | 2.054606000 | -3.251296000 | -1.114757000 |
| C | 3.376834000 | -3.131040000 | 0.644675000  |
| H | 4.335450000 | -3.636642000 | 0.774608000  |
| H | 2.593599000 | -3.767045000 | 1.062638000  |
| C | 3.596891000 | 1.029172000  | 1.547638000  |
| C | 2.374212000 | 0.377910000  | 1.675915000  |
| C | 2.267770000 | -1.021538000 | 1.572220000  |
| C | 3.431910000 | -1.790694000 | 1.333551000  |
| C | 4.660083000 | -1.161034000 | 1.507705000  |
| C | 4.766266000 | 0.235955000  | 1.617799000  |
| H | 1.461244000 | 0.962206000  | 1.703624000  |
| H | 5.572130000 | -1.738087000 | 1.401915000  |
| C | 3.651969000 | 2.456220000  | 1.061243000  |
| C | 4.011735000 | 2.533655000  | -0.496896000 |
| H | 3.409478000 | 3.334639000  | -0.932592000 |
| H | 5.064408000 | 2.804163000  | -0.596154000 |
| H | 4.403266000 | 3.037979000  | 1.600206000  |
| H | 2.678017000 | 2.923412000  | 1.217580000  |
| C | 5.769457000 | -1.905468000 | -1.588623000 |
| C | 6.727287000 | -2.644292000 | -1.611032000 |
| C | 1.334633000 | 1.538046000  | -1.167276000 |
| C | 0.360504000 | 2.236141000  | -0.943252000 |

S91



|   |              |              |              |
|---|--------------|--------------|--------------|
| C | 6.050009000  | 0.843496000  | 1.609342000  |
| C | 7.141956000  | 1.363220000  | 1.589649000  |
| C | 0.978056000  | -1.617855000 | 1.549460000  |
| C | -0.127777000 | -2.110195000 | 1.549215000  |
| C | -3.278899000 | 4.145389000  | -0.083756000 |
| C | -0.847185000 | 2.909359000  | -0.656057000 |
| C | -0.925076000 | 4.305357000  | -0.567537000 |
| C | -2.140036000 | 4.918273000  | -0.281321000 |
| H | -4.212971000 | 4.648332000  | 0.135584000  |
| H | -0.028483000 | 4.892054000  | -0.730389000 |
| H | -2.201366000 | 5.998481000  | -0.214863000 |
| C | -2.017259000 | 2.119210000  | -0.446630000 |
| C | -3.259760000 | 2.742388000  | -0.157644000 |
| C | -4.469559000 | 1.929682000  | 0.056126000  |
| B | -3.032805000 | -0.116429000 | -0.351212000 |
| C | -4.376040000 | 0.517833000  | -0.035276000 |
| C | -5.506839000 | -0.314921000 | 0.159105000  |
| C | -4.080895000 | -2.346903000 | -0.254715000 |
| C | -5.345580000 | -1.774049000 | 0.052994000  |
| C | -6.420866000 | -2.660581000 | 0.246855000  |
| C | -6.279072000 | -4.036466000 | 0.146450000  |
| C | -5.027728000 | -4.580934000 | -0.158996000 |
| C | -3.943917000 | -3.740866000 | -0.356500000 |
| H | -7.397751000 | -2.256756000 | 0.484178000  |
| H | -7.135154000 | -4.682891000 | 0.303634000  |
| H | -4.900602000 | -5.654864000 | -0.243045000 |
| H | -2.967550000 | -4.153254000 | -0.598254000 |
| N | -1.910909000 | 0.747026000  | -0.530245000 |
| H | -0.966281000 | 0.422209000  | -0.715152000 |
| N | -2.967915000 | -1.536853000 | -0.454165000 |
| H | -2.113976000 | -2.032723000 | -0.677710000 |
| C | -5.719780000 | 2.496893000  | 0.346098000  |
| C | -6.738840000 | 0.293371000  | 0.445308000  |
| C | -6.830106000 | 1.679114000  | 0.534853000  |
| H | -7.632319000 | -0.299754000 | 0.598396000  |
| H | -7.790533000 | 2.133356000  | 0.756736000  |
| H | -5.841907000 | 3.570212000  | 0.426372000  |
| H | 8.106302000  | 1.812929000  | 1.581216000  |
| H | -1.104339000 | -2.530670000 | 1.603354000  |
| H | 7.574898000  | -3.286826000 | -1.640618000 |

104

"dimer through space", C2, -2579.79545

|   |              |             |             |
|---|--------------|-------------|-------------|
| C | -0.988966000 | 1.689026000 | 5.198185000 |
| C | -0.203796000 | 1.639714000 | 6.344280000 |
| C | 1.154276000  | 1.274446000 | 6.297988000 |
| C | 1.742893000  | 0.953583000 | 5.051007000 |
| C | 1.037616000  | 1.290431000 | 3.902675000 |
| C | -0.323564000 | 1.650730000 | 3.946617000 |
| H | -0.677636000 | 1.727214000 | 7.315858000 |
| H | 1.489602000  | 1.105255000 | 2.934240000 |

S92

|   |              |              |              |
|---|--------------|--------------|--------------|
| C | -2.481952000 | 1.493814000  | 5.297037000  |
| H | -3.021183000 | 2.154851000  | 4.614251000  |
| H | -2.801065000 | 1.720435000  | 6.315941000  |
| C | -2.915001000 | -0.009301000 | 4.956613000  |
| H | -3.311737000 | -0.034470000 | 3.939682000  |
| H | -3.715964000 | -0.285392000 | 5.645919000  |
| C | 0.988966000  | -1.689026000 | 5.198185000  |
| C | 0.203796000  | -1.639714000 | 6.344280000  |
| C | -1.154276000 | -1.274446000 | 6.297988000  |
| C | -1.742893000 | -0.953583000 | 5.051007000  |
| C | -1.037616000 | -1.290431000 | 3.902675000  |
| C | 0.323564000  | -1.650730000 | 3.946617000  |
| H | 0.677636000  | -1.727214000 | 7.315858000  |
| H | -1.489602000 | -1.105255000 | 2.934240000  |
| C | 2.481952000  | -1.493814000 | 5.297037000  |
| C | 2.915001000  | 0.009301000  | 4.956613000  |
| H | 3.715964000  | 0.285392000  | 5.645919000  |
| H | 3.311737000  | 0.034470000  | 3.939682000  |
| H | 3.021183000  | -2.154851000 | 4.614251000  |
| H | 2.801065000  | -1.720435000 | 6.315941000  |
| C | -1.055270000 | 1.767248000  | 2.744453000  |
| C | -1.722020000 | 1.837017000  | 1.726127000  |
| C | 1.860991000  | 1.046716000  | 7.507861000  |
| C | 2.461166000  | 0.838392000  | 8.537522000  |
| C | 1.055270000  | -1.767248000 | 2.744453000  |
| C | 1.722020000  | -1.837017000 | 1.726127000  |
| C | -1.860991000 | -1.046716000 | 7.507861000  |
| C | -2.461166000 | -0.838392000 | 8.537522000  |
| C | -3.865452000 | 2.181520000  | -1.867890000 |
| C | -4.549494000 | 2.221055000  | -0.657491000 |
| C | -3.849063000 | 2.105418000  | 0.536991000  |
| C | -2.455911000 | 1.937443000  | 0.523532000  |
| H | -4.430228000 | 2.271571000  | -2.786710000 |
| H | -5.625948000 | 2.348499000  | -0.646885000 |
| H | -4.360889000 | 2.148834000  | 1.491486000  |
| C | -2.473022000 | 2.017766000  | -1.941868000 |
| C | -1.760449000 | 1.879655000  | -0.720662000 |
| N | -0.395095000 | 1.686293000  | -0.710293000 |
| C | -1.764574000 | 1.972403000  | -3.230346000 |
| H | -0.000311000 | 1.606100000  | 0.222071000  |
| B | 0.366465000  | 1.573487000  | -1.917658000 |
| C | -0.366465000 | 1.742556000  | -3.237043000 |
| C | 0.361254000  | 1.659936000  | -4.449571000 |
| N | 1.767358000  | 1.322546000  | -1.957275000 |
| H | 2.323634000  | 1.148967000  | -1.129366000 |
| C | 1.805696000  | 1.397701000  | -4.397925000 |
| C | 2.469970000  | 1.229701000  | -3.153516000 |
| C | 3.846734000  | 0.958472000  | -3.119299000 |
| C | 4.579278000  | 0.847810000  | -4.289389000 |
| C | 3.944421000  | 1.016082000  | -5.524075000 |
| C | 2.585492000  | 1.286503000  | -5.562718000 |
| H | 4.327187000  | 0.823238000  | -2.154894000 |

|   |              |              |              |
|---|--------------|--------------|--------------|
| H | 5.641951000  | 0.634348000  | -4.241671000 |
| H | 4.508054000  | 0.934463000  | -6.446762000 |
| H | 2.107291000  | 1.407251000  | -6.527016000 |
| C | 3.865452000  | -2.181520000 | -1.867890000 |
| C | 2.455911000  | -1.937443000 | 0.523532000  |
| C | 3.849063000  | -2.105418000 | 0.536991000  |
| C | 4.549494000  | -2.221055000 | -0.657491000 |
| H | 4.430228000  | -2.271571000 | -2.786710000 |
| H | 4.360889000  | -2.148834000 | 1.491486000  |
| H | 5.625948000  | -2.348499000 | -0.646885000 |
| C | 1.760449000  | -1.879655000 | -0.720662000 |
| C | 2.473022000  | -2.017766000 | -1.941868000 |
| C | 1.764574000  | -1.972403000 | -3.230346000 |
| N | 0.395095000  | -1.686293000 | -0.710293000 |
| H | 0.000311000  | -1.606100000 | 0.222071000  |
| B | -0.366465000 | -1.573487000 | -1.917658000 |
| C | 0.366465000  | -1.742556000 | -3.237043000 |
| C | -0.361254000 | -1.659936000 | -4.449571000 |
| N | -1.767358000 | -1.322546000 | -1.957275000 |
| H | -2.323634000 | -1.148967000 | -1.129366000 |
| C | -1.805696000 | -1.397701000 | -4.397925000 |
| C | -2.469970000 | -1.229701000 | -3.153516000 |
| C | -3.846734000 | -0.958472000 | -3.119299000 |
| C | -4.579278000 | -0.847810000 | -4.289389000 |
| C | -3.944421000 | -1.016082000 | -5.524075000 |
| C | -2.585492000 | -1.286503000 | -5.562718000 |
| H | -4.327187000 | -0.823238000 | -2.154894000 |
| H | -5.641951000 | -0.634348000 | -4.241671000 |
| H | -4.508054000 | -0.934463000 | -6.446762000 |
| H | -2.107291000 | -1.407251000 | -6.527016000 |
| C | 2.423529000  | -2.134940000 | -4.456228000 |
| C | 0.337445000  | -1.818826000 | -5.655992000 |
| C | 1.707633000  | -2.055739000 | -5.646110000 |
| H | -0.175088000 | -1.754170000 | -6.608092000 |
| H | 2.233515000  | -2.171182000 | -6.588397000 |
| H | 3.491614000  | -2.304057000 | -4.500325000 |
| C | -0.337445000 | 1.818826000  | -5.655992000 |
| C | -2.423529000 | 2.134940000  | -4.456228000 |
| C | -1.707633000 | 2.055739000  | -5.646110000 |
| H | 0.175088000  | 1.754170000  | -6.608092000 |
| H | -2.233515000 | 2.171182000  | -6.588397000 |
| H | -3.491614000 | 2.304057000  | -4.500325000 |
| H | 2.985160000  | 0.666276000  | 9.447452000  |
| H | -2.985160000 | -0.666276000 | 9.447452000  |

104

|                           |              |              |              |
|---------------------------|--------------|--------------|--------------|
| "dimer through bond", C2, | -2579.76947  |              |              |
| C                         | 1.416564000  | -0.059092000 | -1.298967000 |
| C                         | 0.657412000  | -1.211977000 | -1.446297000 |
| C                         | -0.752509000 | -1.185593000 | -1.438437000 |
| C                         | -1.416564000 | 0.059092000  | -1.298967000 |

S94

|   |              |              |              |
|---|--------------|--------------|--------------|
| C | -0.657412000 | 1.211977000  | -1.446297000 |
| C | 0.752509000  | 1.185593000  | -1.438437000 |
| H | 1.152188000  | -2.176141000 | -1.394012000 |
| H | -1.152188000 | 2.176141000  | -1.394012000 |
| C | 2.800974000  | -0.142345000 | -0.706191000 |
| H | 3.489025000  | 0.558140000  | -1.185210000 |
| H | 3.187739000  | -1.153089000 | -0.849012000 |
| C | 2.799181000  | 0.180253000  | 0.862918000  |
| H | 3.170933000  | 1.196104000  | 1.006795000  |
| H | 3.494509000  | -0.511956000 | 1.342944000  |
| C | -1.414171000 | -0.076912000 | 1.450546000  |
| C | -0.640214000 | -1.222718000 | 1.604298000  |
| C | 0.765134000  | -1.170617000 | 1.611141000  |
| C | 1.414171000  | 0.076912000  | 1.450546000  |
| C | 0.640214000  | 1.222718000  | 1.604298000  |
| C | -0.765134000 | 1.170617000  | 1.611141000  |
| H | -1.118770000 | -2.195239000 | 1.572212000  |
| H | 1.118770000  | 2.195239000  | 1.572212000  |
| C | -2.799181000 | -0.180253000 | 0.862918000  |
| C | -2.800974000 | 0.142345000  | -0.706191000 |
| H | -3.489025000 | -0.558140000 | -1.185210000 |
| H | -3.187739000 | 1.153089000  | -0.849012000 |
| H | -3.494509000 | 0.511956000  | 1.342944000  |
| H | -3.170933000 | -1.196104000 | 1.006795000  |
| C | 1.463605000  | 2.400872000  | -1.339663000 |
| C | 2.072407000  | 3.446925000  | -1.189740000 |
| C | -1.463605000 | -2.400872000 | -1.339663000 |
| C | -2.072407000 | -3.446925000 | -1.189740000 |
| C | -1.505506000 | 2.383157000  | 1.630840000  |
| C | -2.123216000 | 3.422985000  | 1.677050000  |
| C | 1.505506000  | -2.383157000 | 1.630840000  |
| C | 2.123216000  | -3.422985000 | 1.677050000  |
| C | 3.683909000  | 7.263538000  | -0.503766000 |
| C | 4.541291000  | 6.210650000  | -0.803028000 |
| C | 4.026992000  | 4.939782000  | -1.035189000 |
| C | 2.644834000  | 4.719259000  | -0.970381000 |
| H | 4.110370000  | 8.243266000  | -0.325820000 |
| H | 5.610300000  | 6.382060000  | -0.855773000 |
| H | 4.680162000  | 4.107968000  | -1.271669000 |
| C | 2.290645000  | 7.100640000  | -0.422608000 |
| C | 1.768059000  | 5.802784000  | -0.663341000 |
| N | 0.412267000  | 5.558025000  | -0.602221000 |
| C | 1.389281000  | 8.218292000  | -0.093879000 |
| H | 0.165656000  | 4.587125000  | -0.770979000 |
| B | -0.534111000 | 6.583451000  | -0.302995000 |
| C | -0.006674000 | 7.980245000  | -0.025421000 |
| C | -0.921309000 | 9.015717000  | 0.292443000  |
| N | -1.943600000 | 6.375560000  | -0.252063000 |
| H | -2.373088000 | 5.479300000  | -0.444923000 |
| C | -2.358493000 | 8.704559000  | 0.355222000  |
| C | -2.832745000 | 7.393291000  | 0.076659000  |
| C | -4.207643000 | 7.113186000  | 0.136308000  |

|   |              |               |              |
|---|--------------|---------------|--------------|
| C | -5.122953000 | 8.098317000   | 0.470099000  |
| C | -4.675206000 | 9.392958000   | 0.750517000  |
| C | -3.319096000 | 9.676468000   | 0.689762000  |
| H | -4.545672000 | 6.104493000   | -0.088422000 |
| H | -6.180554000 | 7.860913000   | 0.511334000  |
| H | -5.381096000 | 10.172606000  | 1.013481000  |
| H | -2.990199000 | 10.684861000  | 0.909895000  |
| C | -3.683909000 | -7.263538000  | -0.503766000 |
| C | -2.644834000 | -4.719259000  | -0.970381000 |
| C | -4.026992000 | -4.939782000  | -1.035189000 |
| C | -4.541291000 | -6.210650000  | -0.803028000 |
| H | -4.110370000 | -8.243266000  | -0.325820000 |
| H | -4.680162000 | -4.107968000  | -1.271669000 |
| H | -5.610300000 | -6.382060000  | -0.855773000 |
| C | -1.768059000 | -5.802784000  | -0.663341000 |
| C | -2.290645000 | -7.100640000  | -0.422608000 |
| C | -1.389281000 | -8.218292000  | -0.093879000 |
| B | 0.534111000  | -6.583451000  | -0.302995000 |
| C | 0.006674000  | -7.980245000  | -0.025421000 |
| C | 0.921309000  | -9.015717000  | 0.292443000  |
| C | 2.832745000  | -7.393291000  | 0.076659000  |
| C | 2.358493000  | -8.704559000  | 0.355222000  |
| C | 3.319096000  | -9.676468000  | 0.689762000  |
| C | 4.675206000  | -9.392958000  | 0.750517000  |
| C | 5.122953000  | -8.098317000  | 0.470099000  |
| C | 4.207643000  | -7.113186000  | 0.136308000  |
| H | 2.990199000  | -10.684861000 | 0.909895000  |
| H | 5.381096000  | -10.172606000 | 1.013481000  |
| H | 6.180554000  | -7.860913000  | 0.511334000  |
| H | 4.545672000  | -6.104493000  | -0.088422000 |
| N | -0.412267000 | -5.558025000  | -0.602221000 |
| H | -0.165656000 | -4.587125000  | -0.770979000 |
| N | 1.943600000  | -6.375560000  | -0.252063000 |
| H | 2.373088000  | -5.479300000  | -0.444923000 |
| C | -1.856351000 | -9.517291000  | 0.157887000  |
| C | 0.412267000  | -10.300502000 | 0.536804000  |
| C | -0.957749000 | -10.534327000 | 0.466734000  |
| H | 1.070984000  | -11.125351000 | 0.780229000  |
| H | -1.334924000 | -11.534059000 | 0.657877000  |
| H | -2.913688000 | -9.749673000  | 0.117056000  |
| C | -0.412267000 | 10.300502000  | 0.536804000  |
| C | 1.856351000  | 9.517291000   | 0.157887000  |
| C | 0.957749000  | 10.534327000  | 0.466734000  |
| H | -1.070984000 | 11.125351000  | 0.780229000  |
| H | 1.334924000  | 11.534059000  | 0.657877000  |
| H | 2.913688000  | 9.749673000   | 0.117056000  |
| H | -2.651658000 | 4.341990000   | 1.775053000  |
| H | 2.651658000  | -4.341990000  | 1.775053000  |

## Adiabatic Ionization Energies

All Cartesian coordinates given below were computed at the RI-TPSS-D3(BJ)/def2-TZVP level of theory and are given in Å and absolute energies are given in atomic units.

168

neutral **6'**, -4234.93592

|   |              |              |              |
|---|--------------|--------------|--------------|
| 6 | 0.059573267  | 1.430576032  | -1.370437850 |
| 6 | 1.213541409  | 0.670428883  | -1.519792690 |
| 6 | 1.182396224  | -0.740230518 | -1.511412679 |
| 6 | -0.065345330 | -1.405107795 | -1.371670651 |
| 6 | -1.219713047 | -0.644840219 | -1.516656230 |
| 6 | -1.188590587 | 0.765840090  | -1.506976505 |
| 1 | 2.179843556  | 1.164002128  | -1.474611587 |
| 1 | -2.185742682 | -1.138768789 | -1.469712867 |
| 6 | 0.151407643  | 2.817752617  | -0.784606656 |
| 1 | -0.555915609 | 3.506525198  | -1.255017711 |
| 1 | 1.160824308  | 3.204376768  | -0.945217494 |
| 6 | -0.148810067 | 2.817094643  | 0.788005540  |
| 1 | -1.157794594 | 3.204619338  | 0.949282043  |
| 1 | 0.559309200  | 3.504744968  | 1.258851540  |
| 6 | 0.064023876  | -1.406603097 | 1.370688342  |
| 6 | 1.219111216  | -0.647543101 | 1.516434726  |
| 6 | 1.189212722  | 0.763171661  | 1.508107392  |
| 6 | -0.058345053 | 1.429215382  | 1.372372898  |
| 6 | -1.212976774 | 0.669958199  | 1.521084933  |
| 6 | -1.183105302 | -0.740690340 | 1.511232038  |
| 1 | 2.184714936  | -1.142304157 | 1.469008547  |
| 1 | -2.178907767 | 1.164369941  | 1.477054581  |
| 6 | 0.152646338  | -2.793803995 | 0.784350124  |
| 6 | -0.155352399 | -2.792798220 | -0.786728988 |
| 1 | 0.549171564  | -3.481692433 | -1.261161058 |
| 1 | -1.165882996 | -3.178280119 | -0.942986329 |
| 1 | -0.552555747 | -3.482524098 | 1.258044157  |
| 1 | 1.162799246  | -3.180498786 | 0.940130065  |
| 6 | -2.398728805 | 1.491286909  | -1.420398709 |
| 6 | -3.426442828 | 2.140617762  | -1.301818404 |
| 6 | 2.392130556  | -1.466733383 | -1.428995899 |
| 6 | 3.418064030  | -2.119306843 | -1.313217336 |
| 6 | -2.393461321 | -1.466169010 | 1.428775466  |
| 6 | -3.419320795 | -2.118230784 | 1.309343609  |
| 6 | 2.399906540  | 1.487754427  | 1.422387493  |
| 6 | 3.427543906  | 2.136593747  | 1.300518293  |
| 6 | -6.987829390 | 4.348052462  | -0.955150724 |
| 6 | -5.762369402 | 4.993813706  | -0.816262005 |
| 6 | -4.580671106 | 4.269354379  | -0.929886048 |
| 6 | -4.621058359 | 2.885725025  | -1.171181383 |
| 1 | -7.895542887 | 4.934200207  | -0.868297214 |
| 1 | -5.730136130 | 6.062033150  | -0.624295812 |
| 1 | -3.615783445 | 4.757881136  | -0.836098490 |
| 6 | -7.087680009 | 2.967571047  | -1.199483257 |

|   |               |              |              |
|---|---------------|--------------|--------------|
| 6 | -5.879259560  | 2.221970793  | -1.292958956 |
| 7 | -5.898571221  | 0.859259067  | -1.500261413 |
| 6 | -8.392286864  | 2.300553576  | -1.346798658 |
| 1 | -4.978504696  | 0.428889018  | -1.555079801 |
| 5 | -7.121407209  | 0.122533560  | -1.616727431 |
| 6 | -8.426786866  | 0.898006757  | -1.551313039 |
| 6 | -9.654558438  | 0.202013501  | -1.690166010 |
| 7 | -7.186026841  | -1.286190014 | -1.811034200 |
| 1 | -6.361637369  | -1.875402591 | -1.861152251 |
| 6 | -9.628203801  | -1.254010085 | -1.893900404 |
| 6 | -8.393401238  | -1.959313333 | -1.946683697 |
| 6 | -8.383831191  | -3.353120867 | -2.129905619 |
| 6 | -9.567964522  | -4.061389471 | -2.261867444 |
| 6 | -10.792835775 | -3.384020346 | -2.215701209 |
| 6 | -10.808662282 | -2.008358725 | -2.033917981 |
| 1 | -7.426503367  | -3.867495960 | -2.157405758 |
| 1 | -9.539179904  | -5.139227987 | -2.397202885 |
| 1 | -11.726818256 | -3.929480703 | -2.314902188 |
| 1 | -11.766578355 | -1.500449776 | -1.991691767 |
| 6 | 6.966725554   | -4.347176517 | -0.967033695 |
| 6 | 4.608706493   | -2.870850871 | -1.183667009 |
| 6 | 4.560014528   | -4.254906188 | -0.946309435 |
| 6 | 5.737343257   | -4.986452286 | -0.832707330 |
| 1 | 7.871162482   | -4.938291251 | -0.880033083 |
| 1 | 3.592098079   | -4.738106410 | -0.856143642 |
| 1 | 5.698377907   | -6.055087486 | -0.644168366 |
| 6 | 5.870764812   | -2.213965867 | -1.301817787 |
| 6 | 7.074731350   | -2.966604014 | -1.207160390 |
| 6 | 8.383423407   | -2.306594075 | -1.349139136 |
| 5 | 7.125343772   | -0.121486920 | -1.621612092 |
| 6 | 8.426233852   | -0.904179766 | -1.552944524 |
| 6 | 9.658245655   | -0.214866768 | -1.687281785 |
| 6 | 8.409583047   | 1.953390296  | -1.948221317 |
| 6 | 9.640408690   | 1.241297472  | -1.891099037 |
| 6 | 10.825491087  | 1.989069898  | -2.027272483 |
| 6 | 10.817881691  | 3.364760371  | -2.209435071 |
| 6 | 9.596886192   | 4.048829271  | -2.260033235 |
| 6 | 8.408365011   | 3.347186991  | -2.131906838 |
| 1 | 11.780455601  | 1.475890840  | -1.981667908 |
| 1 | 11.755249898  | 3.904981509  | -2.305244468 |
| 1 | 9.574675017   | 5.126795118  | -2.395608288 |
| 1 | 7.454071619   | 3.866949184  | -2.163022365 |
| 6 | 4.622166357   | 2.881804216  | 1.170892996  |
| 6 | 4.581584192   | 4.265357577  | 0.929226212  |
| 6 | 5.763149501   | 4.990136635  | 0.816587460  |
| 6 | 6.988620852   | 4.344643695  | 0.956483908  |
| 1 | 5.730880079   | 6.058286811  | 0.624284081  |
| 1 | 7.895908692   | 4.931383400  | 0.869353403  |
| 1 | 3.616652664   | 4.753570210  | 0.834253196  |
| 6 | 7.088795109   | 2.964252867  | 1.201117507  |
| 6 | 5.880435043   | 2.218327238  | 1.293919253  |
| 7 | 5.899828867   | 0.855734474  | 1.501385088  |

|   |               |              |              |
|---|---------------|--------------|--------------|
| 6 | 8.393470185   | 2.297522167  | 1.349419285  |
| 1 | 4.979860981   | 0.424994194  | 1.555601913  |
| 6 | 8.428044653   | 0.894911715  | 1.553802721  |
| 5 | 7.122713996   | 0.119171844  | 1.618157352  |
| 7 | 7.187341756   | -1.289617435 | 1.811576603  |
| 6 | 9.655808594   | 0.198938591  | 1.693078826  |
| 1 | 6.362608214   | -1.878644776 | 1.859000990  |
| 6 | 8.394664818   | -1.962716152 | 1.947020648  |
| 6 | 9.629457267   | -1.257221549 | 1.895775559  |
| 6 | 10.809976093  | -2.011505118 | 2.035752565  |
| 6 | 10.794236382  | -3.387375235 | 2.215855256  |
| 6 | 9.569415786   | -4.064982687 | 2.260190877  |
| 6 | 8.385231869   | -3.356799792 | 2.128378892  |
| 1 | 11.767809065  | -1.503339308 | 1.994845190  |
| 1 | 11.728217518  | -3.932824162 | 2.315161979  |
| 1 | 9.540750452   | -5.143030416 | 2.393933681  |
| 1 | 7.428025537   | -3.871481267 | 2.154254102  |
| 6 | -6.968367500  | -4.345398303 | 0.963806206  |
| 6 | -4.610144171  | -2.869542615 | 1.180212209  |
| 6 | -4.561744354  | -4.253232271 | 0.940609063  |
| 6 | -5.739190181  | -4.984583916 | 0.827309820  |
| 1 | -7.872923896  | -4.936277512 | 0.876524364  |
| 1 | -3.593972598  | -4.736320146 | 0.848449384  |
| 1 | -5.700496693  | -6.052908642 | 0.637012441  |
| 6 | -5.872026579  | -2.212756329 | 1.300780403  |
| 6 | -7.076096257  | -2.965165985 | 1.206031522  |
| 6 | -8.384677718  | -2.305288995 | 1.349644729  |
| 7 | -5.899166807  | -0.850109551 | 1.507710398  |
| 1 | -4.981591375  | -0.414450202 | 1.563961090  |
| 5 | -7.126367633  | -0.120297876 | 1.622306964  |
| 6 | -8.427292775  | -0.903003694 | 1.554228992  |
| 6 | -9.659242534  | -0.213707670 | 1.689169220  |
| 7 | -7.199185961  | 1.288094604  | 1.816195998  |
| 1 | -6.378028667  | 1.881827932  | 1.866749802  |
| 6 | -9.641366176  | 1.242378926  | 1.893183582  |
| 6 | -8.410587347  | 1.954532581  | 1.948889014  |
| 6 | -8.409220349  | 3.348407975  | 2.132063469  |
| 6 | -9.597615011  | 4.050061360  | 2.261087742  |
| 6 | -10.818600637 | 3.365889704  | 2.212151375  |
| 6 | -10.826334555 | 1.990124928  | 2.030535724  |
| 1 | -7.454909406  | 3.868246463  | 2.162117045  |
| 1 | -9.575328706  | 5.128076357  | 2.396224288  |
| 1 | -11.755903381 | 3.906053177  | 2.308989684  |
| 1 | -11.781361561 | 1.476924955  | 1.986358305  |
| 7 | 5.898267464   | -0.851161403 | -1.506947066 |
| 1 | 4.981149801   | -0.414522539 | -1.563043192 |
| 7 | 7.198150103   | 1.286847623  | -1.816100242 |
| 1 | 6.376480781   | 1.879662890  | -1.870513576 |
| 6 | 9.594167521   | -3.012525319 | -1.279772455 |
| 6 | 10.848885278  | -0.956048676 | -1.606358166 |
| 6 | 10.803232579  | -2.333256683 | -1.406591738 |
| 1 | 11.815810541  | -0.470727564 | -1.686711987 |



|   |               |              |              |
|---|---------------|--------------|--------------|
| 1 | 11.733680984  | -2.890475503 | -1.335518308 |
| 1 | 9.610893912   | -4.083653376 | -1.112943752 |
| 6 | 10.850771113  | 0.933750530  | 1.617727188  |
| 6 | 9.608390298   | 2.996781532  | 1.285938277  |
| 6 | 10.813307600  | 2.311191161  | 1.418292662  |
| 1 | 11.814699938  | 0.443263149  | 1.702561704  |
| 1 | 9.632577515   | 4.067818199  | 1.119682130  |
| 1 | 11.746946137  | 2.863708538  | 1.352382898  |
| 6 | -9.595449510  | -3.011205899 | 1.280589371  |
| 6 | -10.849939423 | -0.954811313 | 1.608331775  |
| 6 | -10.804435348 | -2.331942716 | 1.408122594  |
| 1 | -11.816855421 | -0.469486733 | 1.688756926  |
| 1 | -11.734944921 | -2.889061624 | 1.337081332  |
| 1 | -9.612332671  | -4.082254357 | 1.113287089  |
| 6 | -10.849489031 | 0.936751179  | -1.613783070 |
| 6 | -9.607119548  | 2.999851572  | -1.282132929 |
| 6 | -10.812043407 | 2.314156571  | -1.413817756 |
| 1 | -11.813482586 | 0.446298970  | -1.698252387 |
| 1 | -11.745740496 | 2.866477844  | -1.347000205 |
| 1 | -9.630512252  | 4.070898896  | -1.115858701 |

168

radical cation **6'**<sup>+</sup>, -4234.74934

|   |              |              |              |
|---|--------------|--------------|--------------|
| 6 | 0.044001477  | 1.520921251  | -1.317455953 |
| 6 | 1.198800767  | 0.775671281  | -1.506571417 |
| 6 | 1.171300837  | -0.635070575 | -1.564424749 |
| 6 | -0.073695852 | -1.315304819 | -1.462791577 |
| 6 | -1.229579070 | -0.553069813 | -1.576390842 |
| 6 | -1.201721456 | 0.857028109  | -1.498565021 |
| 1 | 2.163046359  | 1.269481433  | -1.438320589 |
| 1 | -2.193866343 | -1.052301569 | -1.571807856 |
| 6 | 0.128422833  | 2.868692618  | -0.647093290 |
| 1 | -0.582416727 | 3.582816820  | -1.070966390 |
| 1 | 1.135669637  | 3.269771957  | -0.782665104 |
| 6 | -0.171584544 | 2.759321599  | 0.922134079  |
| 1 | -1.181049208 | 3.131965552  | 1.110140102  |
| 1 | 0.534381840  | 3.415397288  | 1.438534501  |
| 6 | 0.058702638  | -1.498592000 | 1.270732665  |
| 6 | 1.209104058  | -0.745464279 | 1.454577269  |
| 6 | 1.172309133  | 0.665093927  | 1.512799129  |
| 6 | -0.077472334 | 1.336975134  | 1.416358063  |
| 6 | -1.227658489 | 0.566955652  | 1.535168601  |
| 6 | -1.190471305 | -0.842987836 | 1.457826157  |
| 1 | 2.176356554  | -1.232847064 | 1.382680382  |
| 1 | -2.195440282 | 1.059311884  | 1.534545946  |
| 6 | 0.149648621  | -2.845760431 | 0.600120305  |
| 6 | -0.156078789 | -2.738331657 | -0.968188462 |
| 1 | 0.552722226  | -3.389255403 | -1.487194048 |
| 1 | -1.163359772 | -3.118597365 | -1.152686489 |
| 1 | -0.555295549 | -3.564366002 | 1.026226423  |
| 1 | 1.159866811  | -3.240342736 | 0.732723781  |

|   |               |              |              |
|---|---------------|--------------|--------------|
| 6 | -2.406192134  | 1.585636452  | -1.409585208 |
| 6 | -3.421434530  | 2.260331088  | -1.315929900 |
| 6 | 2.387172028   | -1.344890675 | -1.492033081 |
| 6 | 3.432475992   | -1.962016977 | -1.352479795 |
| 6 | -2.390611671  | -1.579549241 | 1.377336924  |
| 6 | -3.402746669  | -2.260089471 | 1.293067164  |
| 6 | 2.384394625   | 1.381044830  | 1.437481816  |
| 6 | 3.429508102   | 1.998683206  | 1.298744556  |
| 6 | -6.996671621  | 4.470897556  | -1.078830328 |
| 6 | -5.771886588  | 5.119381100  | -0.942989445 |
| 6 | -4.581573779  | 4.401823418  | -1.020235282 |
| 6 | -4.609505221  | 3.014740097  | -1.225601332 |
| 1 | -7.904144821  | 5.059722850  | -1.014632266 |
| 1 | -5.746115480  | 6.192028966  | -0.778668231 |
| 1 | -3.623827982  | 4.902277418  | -0.923615713 |
| 6 | -7.090646089  | 3.085974979  | -1.288327901 |
| 6 | -5.870442351  | 2.346561516  | -1.349236955 |
| 7 | -5.878698569  | 0.986275772  | -1.519696879 |
| 6 | -8.382911352  | 2.402133683  | -1.429500194 |
| 1 | -4.953207638  | 0.565653269  | -1.592563072 |
| 5 | -7.093334353  | 0.235747675  | -1.617862704 |
| 6 | -8.402584704  | 0.992687224  | -1.560929963 |
| 6 | -9.619272973  | 0.275275030  | -1.672036160 |
| 7 | -7.130512662  | -1.178727623 | -1.786608637 |
| 1 | -6.293374667  | -1.747708067 | -1.873192848 |
| 6 | -9.572584499  | -1.183885698 | -1.790450954 |
| 6 | -8.319895628  | -1.874558522 | -1.862459464 |
| 6 | -8.283432042  | -3.276150579 | -1.995163704 |
| 6 | -9.453812981  | -4.007774551 | -2.031101257 |
| 6 | -10.693226989 | -3.349863833 | -1.944570329 |
| 6 | -10.739956346 | -1.970027305 | -1.833092572 |
| 1 | -7.316769047  | -3.768836293 | -2.052861476 |
| 1 | -9.413661310  | -5.089316300 | -2.120616862 |
| 1 | -11.615580895 | -3.921958674 | -1.963727221 |
| 1 | -11.707393532 | -1.485358670 | -1.763954643 |
| 6 | 7.045080209   | -4.054334217 | -0.821833391 |
| 6 | 4.638208655   | -2.669737288 | -1.171590165 |
| 6 | 4.631931637   | -4.040555185 | -0.876567617 |
| 6 | 5.832137413   | -4.723688108 | -0.698736385 |
| 1 | 7.961642794   | -4.615331562 | -0.686500118 |
| 1 | 3.681322039   | -4.556673627 | -0.792269648 |
| 1 | 5.821707275   | -5.784100667 | -0.467944597 |
| 6 | 5.886884385   | -1.976174978 | -1.284504959 |
| 6 | 7.116699128   | -2.682210365 | -1.115690495 |
| 6 | 8.399629406   | -1.984828104 | -1.247659358 |
| 5 | 7.083644145   | 0.128301272  | -1.694353063 |
| 6 | 8.403040151   | -0.601855849 | -1.548586437 |
| 6 | 9.613217733   | 0.119063054  | -1.699843184 |
| 6 | 8.298249487   | 2.219250173  | -2.121579648 |
| 6 | 9.554872325   | 1.546147819  | -2.010481450 |
| 6 | 10.719514577  | 2.317615955  | -2.208898068 |
| 6 | 10.664732541  | 3.672740606  | -2.483321080 |

|   |              |              |              |
|---|--------------|--------------|--------------|
| 6 | 9.420851787  | 4.321215497  | -2.569039861 |
| 6 | 8.254603083  | 3.601390374  | -2.390412358 |
| 1 | 11.689186987 | 1.837722254  | -2.140241347 |
| 1 | 11.582872695 | 4.233170796  | -2.628970636 |
| 1 | 9.371901561  | 5.385518667  | -2.778477881 |
| 1 | 7.285433938  | 4.087544037  | -2.460599417 |
| 6 | 4.640839889  | 2.698708547  | 1.125836370  |
| 6 | 4.648495704  | 4.068514936  | 0.826738104  |
| 6 | 5.856209713  | 4.741995232  | 0.662454408  |
| 6 | 7.062507189  | 4.064280546  | 0.803991364  |
| 1 | 5.857068257  | 5.801740791  | 0.428467373  |
| 1 | 7.984889018  | 4.618427761  | 0.679994937  |
| 1 | 3.703079821  | 4.591553411  | 0.728079308  |
| 6 | 7.120192504  | 2.692336381  | 1.102035166  |
| 6 | 5.882940956  | 1.995820579  | 1.255081117  |
| 7 | 5.858390765  | 0.650563619  | 1.522356848  |
| 6 | 8.395720210  | 1.985650638  | 1.254369766  |
| 1 | 4.924496743  | 0.257837883  | 1.629698031  |
| 6 | 8.384190237  | 0.602834808  | 1.555831460  |
| 5 | 7.057508616  | -0.117710288 | 1.682027667  |
| 7 | 7.071927807  | -1.518280255 | 1.946192433  |
| 6 | 9.586530171  | -0.126937251 | 1.725415435  |
| 1 | 6.226178222  | -2.070303143 | 2.055252456  |
| 6 | 8.249989470  | -2.217009645 | 2.127629252  |
| 6 | 9.513024534  | -1.553144381 | 2.036291575  |
| 6 | 10.668834393 | -2.332538561 | 2.254360484  |
| 6 | 10.599629416 | -3.687052135 | 2.528416896  |
| 6 | 9.349808136  | -4.326640481 | 2.593820629  |
| 6 | 8.191807401  | -3.598683198 | 2.396082068  |
| 1 | 11.642538722 | -1.858629124 | 2.202104824  |
| 1 | 11.510966938 | -4.254211595 | 2.689991624  |
| 1 | 9.289781270  | -5.390480994 | 2.802884725  |
| 1 | 7.217514869  | -4.076469012 | 2.450927700  |
| 6 | -6.972909417 | -4.482125614 | 1.091870800  |
| 6 | -4.588763108 | -3.018840071 | 1.214128518  |
| 6 | -4.558535180 | -4.406109478 | 1.011005349  |
| 6 | -5.747471917 | -5.127234323 | 0.946077647  |
| 1 | -7.879077200 | -5.073861667 | 1.036712343  |
| 1 | -3.600178727 | -4.903975307 | 0.907501512  |
| 1 | -5.719916012 | -6.200093038 | 0.783404143  |
| 6 | -5.850461107 | -2.354162048 | 1.348616203  |
| 6 | -7.069130761 | -3.097097674 | 1.299705963  |
| 6 | -8.361877278 | -2.416564181 | 1.451378131  |
| 7 | -5.860832303 | -0.993845230 | 1.517679736  |
| 1 | -4.936015138 | -0.569648949 | 1.579070012  |
| 5 | -7.076375177 | -0.246839500 | 1.628914208  |
| 6 | -8.383953611 | -1.007251542 | 1.583692386  |
| 6 | -9.601393350 | -0.292941423 | 1.705085587  |
| 7 | -7.115391169 | 1.167438420  | 1.799383365  |
| 1 | -6.278572198 | 1.738089001  | 1.878734725  |
| 6 | -9.557299959 | 1.166273726  | 1.823255118  |
| 6 | -8.305734054 | 1.860188392  | 1.885528360  |

|   |               |              |              |
|---|---------------|--------------|--------------|
| 6 | -8.271834517  | 3.261908617  | 2.018155688  |
| 6 | -9.443830115  | 3.990422950  | 2.062735074  |
| 6 | -10.682197815 | 3.329281313  | 1.985263474  |
| 6 | -10.726393344 | 1.949306258  | 1.874373358  |
| 1 | -7.306065606  | 3.757176218  | 2.068604872  |
| 1 | -9.405943990  | 5.072106200  | 2.151620864  |
| 1 | -11.605788479 | 3.899160662  | 2.009982842  |
| 1 | -11.692786213 | 1.461666288  | 1.811655958  |
| 7 | 5.876449791   | -0.630618392 | -1.551359219 |
| 1 | 4.947663442   | -0.229786332 | -1.672749989 |
| 7 | 7.112452223   | 1.528706650  | -1.958607085 |
| 1 | 6.271627322   | 2.085248231  | -2.081815953 |
| 6 | 9.634904218   | -2.637347464 | -1.075341585 |
| 6 | 10.829720276  | -0.570384674 | -1.519410812 |
| 6 | 10.824988795  | -1.928174185 | -1.214052118 |
| 1 | 11.780874278  | -0.059012731 | -1.612043412 |
| 1 | 11.769437500  | -2.443890167 | -1.067909146 |
| 1 | 9.682609424   | -3.691316148 | -0.827024974 |
| 6 | 10.810938550  | 0.552917324  | 1.562878229  |
| 6 | 9.638429921   | 2.629024129  | 1.102045424  |
| 6 | 10.820986768  | 1.910894965  | 1.258474602  |
| 1 | 11.756132315  | 0.033116722  | 1.668605786  |
| 1 | 9.697765905   | 3.682927223  | 0.855754544  |
| 1 | 11.771409556  | 2.419746063  | 1.127438420  |
| 6 | -9.585319247  | -3.109713515 | 1.461458707  |
| 6 | -10.805671283 | -1.021293291 | 1.701553176  |
| 6 | -10.782104273 | -2.407962053 | 1.587711617  |
| 1 | -11.762951561 | -0.519761402 | 1.791454466  |
| 1 | -11.719478712 | -2.956635625 | 1.588683593  |
| 1 | -9.620037190  | -4.189728539 | 1.372394995  |
| 6 | -10.825079122 | 1.000873536  | -1.659147242 |
| 6 | -9.607953929  | 3.092408397  | -1.430851624 |
| 6 | -10.804018543 | 2.387678974  | -1.546958880 |
| 1 | -11.782125723 | 0.497570979  | -1.741397463 |
| 1 | -11.742702581 | 2.934133140  | -1.542018346 |
| 1 | -9.644465988  | 4.172488953  | -1.343248508 |

168

diradical dication  $\mathbf{6}^{2+}$ , -4234.57581

|   |              |              |              |
|---|--------------|--------------|--------------|
| 6 | 0.044001477  | 1.520921251  | -1.317455953 |
| 6 | 1.198800767  | 0.775671281  | -1.506571417 |
| 6 | 1.171300837  | -0.635070575 | -1.564424749 |
| 6 | -0.073695852 | -1.315304819 | -1.462791577 |
| 6 | -1.229579070 | -0.553069813 | -1.576390842 |
| 6 | -1.201721456 | 0.857028109  | -1.498565021 |
| 1 | 2.163046359  | 1.269481433  | -1.438320589 |
| 1 | -2.193866343 | -1.052301569 | -1.571807856 |
| 6 | 0.128422833  | 2.868692618  | -0.647093290 |
| 1 | -0.582416727 | 3.582816820  | -1.070966390 |
| 1 | 1.135669637  | 3.269771957  | -0.782665104 |
| 6 | -0.171584544 | 2.759321599  | 0.922134079  |

|   |               |              |              |
|---|---------------|--------------|--------------|
| 1 | -1.181049208  | 3.131965552  | 1.110140102  |
| 1 | 0.534381840   | 3.415397288  | 1.438534501  |
| 6 | 0.058702638   | -1.498592000 | 1.270732665  |
| 6 | 1.209104058   | -0.745464279 | 1.454577269  |
| 6 | 1.172309133   | 0.665093927  | 1.512799129  |
| 6 | -0.077472334  | 1.336975134  | 1.416358063  |
| 6 | -1.227658489  | 0.566955652  | 1.535168601  |
| 6 | -1.190471305  | -0.842987836 | 1.457826157  |
| 1 | 2.176356554   | -1.232847064 | 1.382680382  |
| 1 | -2.195440282  | 1.059311884  | 1.534545946  |
| 6 | 0.149648621   | -2.845760431 | 0.600120305  |
| 6 | -0.156078789  | -2.738331657 | -0.968188462 |
| 1 | 0.552722226   | -3.389255403 | -1.487194048 |
| 1 | -1.163359772  | -3.118597365 | -1.152686489 |
| 1 | -0.555295549  | -3.564366002 | 1.026226423  |
| 1 | 1.159866811   | -3.240342736 | 0.732723781  |
| 6 | -2.406192134  | 1.585636452  | -1.409585208 |
| 6 | -3.421434530  | 2.260331088  | -1.315929900 |
| 6 | 2.387172028   | -1.344890675 | -1.492033081 |
| 6 | 3.432475992   | -1.962016977 | -1.352479795 |
| 6 | -2.390611671  | -1.579549241 | 1.377336924  |
| 6 | -3.402746669  | -2.260089471 | 1.293067164  |
| 6 | 2.384394625   | 1.381044830  | 1.437481816  |
| 6 | 3.429508102   | 1.998683206  | 1.298744556  |
| 6 | -6.996671621  | 4.470897556  | -1.078830328 |
| 6 | -5.771886588  | 5.119381100  | -0.942989445 |
| 6 | -4.581573779  | 4.401823418  | -1.020235282 |
| 6 | -4.609505221  | 3.014740097  | -1.225601332 |
| 1 | -7.904144821  | 5.059722850  | -1.014632266 |
| 1 | -5.746115480  | 6.192028966  | -0.778668231 |
| 1 | -3.623827982  | 4.902277418  | -0.923615713 |
| 6 | -7.090646089  | 3.085974979  | -1.288327901 |
| 6 | -5.870442351  | 2.346561516  | -1.349236955 |
| 7 | -5.878698569  | 0.986275772  | -1.519696879 |
| 6 | -8.382911352  | 2.402133683  | -1.429500194 |
| 1 | -4.953207638  | 0.565653269  | -1.592563072 |
| 5 | -7.093334353  | 0.235747675  | -1.617862704 |
| 6 | -8.402584704  | 0.992687224  | -1.560929963 |
| 6 | -9.619272973  | 0.275275030  | -1.672036160 |
| 7 | -7.130512662  | -1.178727623 | -1.786608637 |
| 1 | -6.293374667  | -1.747708067 | -1.873192848 |
| 6 | -9.572584499  | -1.183885698 | -1.790450954 |
| 6 | -8.319895628  | -1.874558522 | -1.862459464 |
| 6 | -8.283432042  | -3.276150579 | -1.995163704 |
| 6 | -9.453812981  | -4.007774551 | -2.031101257 |
| 6 | -10.693226989 | -3.349863833 | -1.944570329 |
| 6 | -10.739956346 | -1.970027305 | -1.833092572 |
| 1 | -7.316769047  | -3.768836293 | -2.052861476 |
| 1 | -9.413661310  | -5.089316300 | -2.120616862 |
| 1 | -11.615580895 | -3.921958674 | -1.963727221 |
| 1 | -11.707393532 | -1.485358670 | -1.763954643 |
| 6 | 7.045080209   | -4.054334217 | -0.821833391 |

|   |              |              |              |
|---|--------------|--------------|--------------|
| 6 | 4.638208655  | -2.669737288 | -1.171590165 |
| 6 | 4.631931637  | -4.040555185 | -0.876567617 |
| 6 | 5.832137413  | -4.723688108 | -0.698736385 |
| 1 | 7.961642794  | -4.615331562 | -0.686500118 |
| 1 | 3.681322039  | -4.556673627 | -0.792269648 |
| 1 | 5.821707275  | -5.784100667 | -0.467944597 |
| 6 | 5.886884385  | -1.976174978 | -1.284504959 |
| 6 | 7.116699128  | -2.682210365 | -1.115690495 |
| 6 | 8.399629406  | -1.984828104 | -1.247659358 |
| 5 | 7.083644145  | 0.128301272  | -1.694353063 |
| 6 | 8.403040151  | -0.601855849 | -1.548586437 |
| 6 | 9.613217733  | 0.119063054  | -1.699843184 |
| 6 | 8.298249487  | 2.219250173  | -2.121579648 |
| 6 | 9.554872325  | 1.546147819  | -2.010481450 |
| 6 | 10.719514577 | 2.317615955  | -2.208898068 |
| 6 | 10.664732541 | 3.672740606  | -2.483321080 |
| 6 | 9.420851787  | 4.321215497  | -2.569039861 |
| 6 | 8.254603083  | 3.601390374  | -2.390412358 |
| 1 | 11.689186987 | 1.837722254  | -2.140241347 |
| 1 | 11.582872695 | 4.233170796  | -2.628970636 |
| 1 | 9.371901561  | 5.385518667  | -2.778477881 |
| 1 | 7.285433938  | 4.087544037  | -2.460599417 |
| 6 | 4.640839889  | 2.698708547  | 1.125836370  |
| 6 | 4.648495704  | 4.068514936  | 0.826738104  |
| 6 | 5.856209713  | 4.741995232  | 0.662454408  |
| 6 | 7.062507189  | 4.064280546  | 0.803991364  |
| 1 | 5.857068257  | 5.801740791  | 0.428467373  |
| 1 | 7.984889018  | 4.618427761  | 0.679994937  |
| 1 | 3.703079821  | 4.591553411  | 0.728079308  |
| 6 | 7.120192504  | 2.692336381  | 1.102035166  |
| 6 | 5.882940956  | 1.995820579  | 1.255081117  |
| 7 | 5.858390765  | 0.650563619  | 1.522356848  |
| 6 | 8.395720210  | 1.985650638  | 1.254369766  |
| 1 | 4.924496743  | 0.257837883  | 1.629698031  |
| 6 | 8.384190237  | 0.602834808  | 1.555831460  |
| 5 | 7.057508616  | -0.117710288 | 1.682027667  |
| 7 | 7.071927807  | -1.518280255 | 1.946192433  |
| 6 | 9.586530171  | -0.126937251 | 1.725415435  |
| 1 | 6.226178222  | -2.070303143 | 2.055252456  |
| 6 | 8.249989470  | -2.217009645 | 2.127629252  |
| 6 | 9.513024534  | -1.553144381 | 2.036291575  |
| 6 | 10.668834393 | -2.332538561 | 2.254360484  |
| 6 | 10.599629416 | -3.687052135 | 2.528416896  |
| 6 | 9.349808136  | -4.326640481 | 2.593820629  |
| 6 | 8.191807401  | -3.598683198 | 2.396082068  |
| 1 | 11.642538722 | -1.858629124 | 2.202104824  |
| 1 | 11.510966938 | -4.254211595 | 2.689991624  |
| 1 | 9.289781270  | -5.390480994 | 2.802884725  |
| 1 | 7.217514869  | -4.076469012 | 2.450927700  |
| 6 | -6.972909417 | -4.482125614 | 1.091870800  |
| 6 | -4.588763108 | -3.018840071 | 1.214128518  |
| 6 | -4.558535180 | -4.406109478 | 1.011005349  |

|   |               |              |              |
|---|---------------|--------------|--------------|
| 6 | -5.747471917  | -5.127234323 | 0.946077647  |
| 1 | -7.879077200  | -5.073861667 | 1.036712343  |
| 1 | -3.600178727  | -4.903975307 | 0.907501512  |
| 1 | -5.719916012  | -6.200093038 | 0.783404143  |
| 6 | -5.850461107  | -2.354162048 | 1.348616203  |
| 6 | -7.069130761  | -3.097097674 | 1.299705963  |
| 6 | -8.361877278  | -2.416564181 | 1.451378131  |
| 7 | -5.860832303  | -0.993845230 | 1.517679736  |
| 1 | -4.936015138  | -0.569648949 | 1.579070012  |
| 5 | -7.076375177  | -0.246839500 | 1.628914208  |
| 6 | -8.383953611  | -1.007251542 | 1.583692386  |
| 6 | -9.601393350  | -0.292941423 | 1.705085587  |
| 7 | -7.115391169  | 1.167438420  | 1.799383365  |
| 1 | -6.278572198  | 1.738089001  | 1.878734725  |
| 6 | -9.557299959  | 1.166273726  | 1.823255118  |
| 6 | -8.305734054  | 1.860188392  | 1.885528360  |
| 6 | -8.271834517  | 3.261908617  | 2.018155688  |
| 6 | -9.443830115  | 3.990422950  | 2.062735074  |
| 6 | -10.682197815 | 3.329281313  | 1.985263474  |
| 6 | -10.726393344 | 1.949306258  | 1.874373358  |
| 1 | -7.306065606  | 3.757176218  | 2.068604872  |
| 1 | -9.405943990  | 5.072106200  | 2.151620864  |
| 1 | -11.605788479 | 3.899160662  | 2.009982842  |
| 1 | -11.692786213 | 1.461666288  | 1.811655958  |
| 7 | 5.876449791   | -0.630618392 | -1.551359219 |
| 1 | 4.947663442   | -0.229786332 | -1.672749989 |
| 7 | 7.112452223   | 1.528706650  | -1.958607085 |
| 1 | 6.271627322   | 2.085248231  | -2.081815953 |
| 6 | 9.634904218   | -2.637347464 | -1.075341585 |
| 6 | 10.829720276  | -0.570384674 | -1.519410812 |
| 6 | 10.824988795  | -1.928174185 | -1.214052118 |
| 1 | 11.780874278  | -0.059012731 | -1.612043412 |
| 1 | 11.769437500  | -2.443890167 | -1.067909146 |
| 1 | 9.682609424   | -3.691316148 | -0.827024974 |
| 6 | 10.810938550  | 0.552917324  | 1.562878229  |
| 6 | 9.638429921   | 2.629024129  | 1.102045424  |
| 6 | 10.820986768  | 1.910894965  | 1.258474602  |
| 1 | 11.756132315  | 0.033116722  | 1.668605786  |
| 1 | 9.697765905   | 3.682927223  | 0.855754544  |
| 1 | 11.771409556  | 2.419746063  | 1.127438420  |
| 6 | -9.585319247  | -3.109713515 | 1.461458707  |
| 6 | -10.805671283 | -1.021293291 | 1.701553176  |
| 6 | -10.782104273 | -2.407962053 | 1.587711617  |
| 1 | -11.762951561 | -0.519761402 | 1.791454466  |
| 1 | -11.719478712 | -2.956635625 | 1.588683593  |
| 1 | -9.620037190  | -4.189728539 | 1.372394995  |
| 6 | -10.825079122 | 1.000873536  | -1.659147242 |
| 6 | -9.607953929  | 3.092408397  | -1.430851624 |
| 6 | -10.804018543 | 2.387678974  | -1.546958880 |
| 1 | -11.782125723 | 0.497570979  | -1.741397463 |
| 1 | -11.742702581 | 2.934133140  | -1.542018346 |
| 1 | -9.644465988  | 4.172488953  | -1.343248508 |

## References

- [1] W. H. Melhuish, *J. Phys. Chem.* **1960**, *64*, 762–764.
- [2] F. Zinna, T. Bruhn, C. A. Guido, J. Ahrens, M. Bröring, L. Di Bari, G. Pescitelli, *Chem. Eur. J.* **2016**, *22*, 16089–16098.
- [3] M. Fingerle, S. Stocker, H. F. Bettinger, *Synthesis* **2019**, *51*, 4147–4152.
- [4] B. König, B. Knieriem, A. De Meijere, *Chem. Ber.* **1993**, *126*, 1643–1650.
- [5] L. Bondarenko, I. Dix, H. Hinrichs, H. Hopf, *Synthesis* **2004**, *2004*, 2751–2759.
- [6] Y. Morisaki, M. Gon, T. Sasamori, N. Tokitoh, Y. Chujo, *J. Am. Chem. Soc.* **2014**, *136*, 3350–3353.
- [7] S. Schundelmeier, B. Speiser, H. F. Bettinger, R. Einholz, *ChemPhysChem* **2017**, *18*, 2266–2278.
- [8] A. Schank, B. Speiser, A. Stickel, *J. Electroanal. Chem.* **2016**, *779*, 137–145.
- [9] J. Tao, J. P. Perdew, V. N. Staroverov, G. E. Scuseria, *Phys. Rev. Lett.* **2003**, *91*, 146401.
- [10] S. Grimme, C. Mück-Lichtenfeld, *Isr. J. Chem.* **2012**, *52*, 180.
- [11] F. Weigend, F. Furche, R. Ahlrichs, *J. Chem. Phys.* **2003**, *119*, 12753–12762.
- [12] F. Weigend, *Phys. Chem. Chem. Phys.* **2006**, *8*, 1057–1065.
- [13] S. Grimme, J. Antony, S. Ehrlich, H. Krieg, *J. Chem. Phys.* **2010**, *132*, 154104.
- [14] S. Grimme, S. Ehrlich, L. Goerigk, *J. Comput. Chem.* **2011**, *32*, 1456–1465.
- [15] S. G. Balasubramani, G. P. Chen, S. Coriani, M. Diedenhofen, M. S. Frank, Y. J. Franzke, F. Furche, R. Grotjahn, M. E. Harding, C. Hättig, A. Hellweg, B. Helmich-Paris, C. Holzer, U. Huniar, M. Kaupp, A. Marefat Khah, S. Karbalaeei Khani, T. Müller, F. Mack, B. D. Nguyen, S. M. Parker, E. Perlt, D. Rappoport, K. Reiter, S. Roy, M. Rückert, G. Schmitz, M. Sierka, E. Tapavicza, D. P. Tew, C. Van Wüllen, V. K. Voora, F. Weigend, A. Wodyński, J. M. Yu, *J. Chem. Phys.* **2020**, *152*, 184107.
- [16] A. D. Becke, *J. Chem. Phys.* **1993**, *98*, 5648–5652.
- [17] C. Lee, W. Yang, R. G. Parr, *Phys. Rev. B* **1988**, *37*, 785–789.
- [18] Gaussian 16, Revision C.01, M. J. Frisch, G. W. Trucks, H. B. Schlegel, G. E. Scuseria, M. A. Robb, J. R. Cheeseman, G. Scalmani, V. Barone, G. a. Petersson, H. Nakatsuji, X. Li, M. Caricato, a. V. Marenich, J. Bloino, B. G. Janesko, R. Gomperts, B. Mennucci, H. P. Hratchian, J. V. Ortiz, a. F. Izmaylov, J. L. Sonnenberg, Williams, F. Ding, F. Lipparini, F. Egidi, J. Goings, B. Peng, A. Petrone, T. Henderson, D. Ranasinghe, V. G. Zakrzewski, J. Gao, N. Rega, G. Zheng, W. Liang, M. Hada, M. Ehara, K. Toyota, R. Fukuda, J. Hasegawa, M. Ishida, T. Nakajima, Y. Honda, O. Kitao, H. Nakai, T. Vreven, K. Throssell, J. a. Montgomery Jr., J. E. Peralta, F. Ogliaro, M. J. Bearpark, J. J. Heyd, E. N. Brothers, K. N. Kudin, V. N. Staroverov, T. a. Keith, R. Kobayashi, J. Normand, K. Raghavachari, a. P. Rendell, J. C. Burant, S. S. Iyengar, J. Tomasi, M. Cossi, J. M. Millam, M. Klene, C. Adamo, R. Cammi, J. W. Ochterski, R. L. Martin, K. Morokuma, O. Farkas, J. B. Foresman, D. J. Fox, **2016**.
- [19] J. Schirmer, *Phys. Rev. A* **1982**, *26*, 2395.



- [20] R. E. Stratmann, G. E. Scuseria, M. J. Frisch, *J. Chem. Phys.* **1998**, *109*, 8218–8224.
- [21] F. Weigend, M. Häser, H. Patzelt, R. Ahlrichs, *Chem. Phys. Lett.* **1998**, *294*, 143.
- [22] T. Yanai, D. P. Tew, N. C. Handy, *Chem. Phys. Lett.* **2004**, *393*, 51–57.
- [23] J. Da Chai, M. Head-Gordon, *Phys. Chem. Chem. Phys.* **2008**, *10*, 6615–6620.
- [24] Y. Zhao, D. G. Truhlar, *Theor. Chem. Acc.* **2008**, *120*, 215–241.
- [25] C. Hättig, *Adv. quantum Chem.* **2005**, *50*, 37.
- [26] H. Kubo, T. Hirose, T. Nakashima, T. Kawai, J. Y. Hasegawa, K. Matsuda, *J. Phys. Chem. Lett.* **2021**, *12*, 686–695.
- [27] F. Furche, R. Ahlrichs, *J. Chem. Phys.* **2002**, *117*, 7433–7447.
- [28] G. Scalmani, M. J. Frisch, B. Mennucci, J. Tomasi, R. Cammi, V. Barone, *J. Chem. Phys.* **2006**, *124*, 094107.
- [29] F. Weigend, R. Ahlrichs, *Phys. Chem. Chem. Phys.* **2005**, *7*, 3297–3305.
- [30] M. Gon, Y. Morisaki, Y. Chujo, *Eur. J. Org. Chem.* **2015**, *2015*, 7756–7762.
- [31] F. Neese, F. Wennmohs, A. Hansen, U. Becker, *Chem. Phys.* **2009**, *356*, 98–109.
- [32] A. V. Marenich, C. J. Cramer, D. G. Truhlar, *J. Phys. Chem. B* **2009**, *113*, 6378–6396.
- [33] F. Neese, *WIREs Comput. Mol. Sci.* **2012**, *2*, 73–78.
- [34] F. Neese, *WIREs Comput. Mol. Sci.* **2018**, *8*, e1327.
